# Supplementary material for: Proteomic and Biochemical Analyses of the Mechanism of Tolerance in Mutant Soybean Responding to Flooding Stress
Source: MDPI journal article supplement (doi:10.3390/ijms22169046), 2021-08-22
Supplement: s1 [file s1]

Supplemental Table S3. List of changed proteins in mutant line compared with wild type soybean under non-flooding

| Fold   |            |                                                        | Cov |    | MW    | calc  |         |
|--------|------------|--------------------------------------------------------|-----|----|-------|-------|---------|
| change | Accession  | Protein names                                          | (%) | MP | (kDa) | pI    | p-value |
| 6.2056 | C6TMB5     | Uncharacterized protein                                | 45  | 5  | 17.8  | 8.97  | 0.0013  |
| 5.8848 | C6T9K9     | Elongation factor Tu                                   | 49  | 17 | 49.8  | 7.05  | 0.0002  |
| 5.6934 | I1KMK2     | Uncharacterized protein                                | 4   | 3  | 162.5 | 8.13  | 0.0015  |
| 4.7650 | I1KZW3     | Uncharacterized protein                                | 32  | 6  | 32.8  | 5.92  | 0.0006  |
| 4.5582 | I1MV69     | Uncharacterized protein                                | 25  | 4  | 27.5  | 9.2   | 0.0042  |
| 4.3471 | I1KBD1     | Protein kinase domain-containing protein               | 4   | 2  | 129.2 | 6.74  | 0.0034  |
| 4.1682 | C6SYA5     | 60S ribosomal protein L18a                             | 29  | 4  | 21.3  | 10.42 | 0.0006  |
| 3.6515 | A0A0R4J4G7 | Uncharacterized protein                                | 15  | 2  | 29.4  | 6.79  | 0.0017  |
| 3.4478 | I1LVI3     | Uncharacterized protein                                | 12  | 9  | 100.1 | 9.07  | 0.0037  |
| 3.3423 | A0A0R0GL62 | PRA1 family protein                                    | 22  | 2  | 23.1  | 9.82  | 0.0004  |
| 3.3384 | I1KQE2     | Uncharacterized protein                                | 59  | 9  | 34.6  | 7.81  | 0.0126  |
| 3.0367 | A0A0R0I304 | Uncharacterized protein                                | 8   | 2  | 57.6  | 8.94  | 0.0405  |
| 2.9024 | I1JJ62     | Citrate synthase (EC 2.3.3.16)                         | 19  | 5  | 56.5  | 8.72  | 0.0285  |
| 2.8070 | C6TMH1     | ZnMc domain-containing protein                         | 12  | 2  | 40.1  | 5.63  | 0.0193  |
| 2.7239 | I1NCN7     | Uncharacterized protein                                | 5   | 3  | 115.7 | 6.46  | 0.0125  |
| 2.7003 | C6TKW5     | MHD domain-containing protein                          | 7   | 2  | 49.7  | 7.18  | 0.0038  |
| 2.6352 | I1KJ00     | Uncharacterized protein                                | 14  | 3  | 28.2  | 5.43  | 0.0334  |
| 2.4269 | A0A0R0KF48 | Uncharacterized protein                                | 41  | 14 | 65.2  | 6.21  | 0.0005  |
| 2.3746 | Q1WCP1     | Cytochrome P450 monooxygenase CYP94D24                 | 6   | 2  | 39.3  | 9.22  | 0.0012  |
| 2.3474 | I1LRQ2     | NEDD8-activating enzyme E1 regulatory subunit          | 21  | 5  | 57.9  | 5.24  | 0.0388  |
| 2.3034 | I1KLU0     | Mitogen-activated protein kinase (EC 2.7.11.24)        | 27  | 7  | 49.9  | 5.96  | 0.0309  |
| 2.3008 | K7KRK2     | Uncharacterized protein                                | 17  | 3  | 31.5  | 6.44  | 0.0265  |
| 2.2760 | I1NGM0     | Uncharacterized protein                                | 5   | 2  | 75.1  | 9.01  | 0.0018  |
| 2.2590 | I1LMC1     | RRM domain-containing protein                          | 10  | 2  | 31.7  | 11.41 | 0.0369  |
| 2.0603 | C6T721     | Aldose 1-epimerase (EC 5.1.3.3) (Galactose mutarotase) | 13  | 3  | 40.6  | 9.28  | 0.0178  |
| 1.9815 | I1L7R7     | CTP synthase (EC 6.3.4.2) (UTP--ammonia ligase)        | 9   | 3  | 61.6  | 6.05  | 0.0007  |
| 1.9552 | K7KU37     | Uncharacterized protein                                | 2   | 2  | 147.2 | 5.94  | 0.0106  |
| 1.8579 | I1LWX5     | Uncharacterized protein                                | 21  | 6  | 54.2  | 7.42  | 0.0172  |
| 1.7970 | I1JET8     | Uncharacterized protein                                | 6   | 2  | 56.9  | 6.48  | 0.0121  |
| 1.7764 | K7LF33     | RBR-type E3 ubiquitin transferase (EC 2.3.2.31)        | 10  | 3  | 68.2  | 5.26  | 0.0049  |
| 1.7466 | I1MRW2     | Importin N-terminal domain-containing protein          | 5   | 4  | 123.7 | 4.83  | 0.0006  |
| 1.6853 | C6TIP6     | Uncharacterized protein                                | 10  | 3  | 54.5  | 8.25  | 0.0492  |
| 1.6347 | K7LSJ2     | Importin N-terminal domain-containing protein          | 24  | 17 | 123.9 | 5.57  | 0.0132  |
| 1.4224 | A0A0R0EP22 | Uncharacterized protein                                | 14  | 6  | 76.5  | 7.87  | 0.0055  |
| 1.3771 | I1NB50     | Uncharacterized protein                                | 7   | 2  | 52.8  | 7.9   | 0.0258  |
| 1.3363 | I1N3Y0     | Uncharacterized protein                                | 15  | 4  | 46.1  | 7.05  | 0.0003  |
| 1.2035 | A0A0R0KFE8 | Chlorophyll a-b binding protein, chloroplastic         | 27  | 5  | 31.4  | 6.32  | 0.0008  |
| 1.1934 | I1LM96     | 60S ribosomal export protein NMD3                      | 8   | 3  | 58.5  | 6.73  | 0.0356  |
| 1.1687 | A0A0R0IH39 | Uncharacterized protein                                | 2   | 2  | 212.1 | 7.31  | 0.0270  |
| 1.1259 | A0A0R0EM40 | Uncharacterized protein                                | 8   | 3  | 57.1  | 8.63  | 0.0250  |
| 1.1152 | K7MFQ7     | Uncharacterized protein                                | 15  | 6  | 68.8  | 8.5   | 0.0137  |
| 1.1091 | I1LJG3     | Flavodoxin-like domain-containing protein              | 25  | 4  | 27.3  | 6     | 0.0399  |
| 1.0995 | K7MNN1     | Aminotran_1_2 domain-containing protein                | 12  | 3  | 52.8  | 7.94  | 0.0004  |
| 1.0771 | I1K072     | Uncharacterized protein                                | 33  | 16 | 77.3  | 5.14  | 0.0052  |
| 1.0701 | I1NAS0     | EF-hand domain-containing protein                      | 9   | 3  | 47.3  | 5.49  | 0.0233  |
| 1.0662 | I1K6B1     | NAB domain-containing protein                          | 5   | 4  | 139.4 | 4.94  | 0.0418  |
| 1.0491 | K7M034     | BED-type domain-containing protein                     | 8   | 6  | 122.7 | 5     | 0.0331  |
| 1.0433 | A0A0R0JDS4 | TP_methylase domain-containing protein                 | 24  | 2  | 30.8  | 5.39  | 0.0495  |

|         |            |                                                          |    |    |       |       |        |
|---------|------------|----------------------------------------------------------|----|----|-------|-------|--------|
| 0.9923  | C6T065     | Ribosomal_S17_N domain-containing protein                | 31 | 4  | 17.8  | 10.56 | 0.0173 |
| 0.9801  | I1L0D9     | Peroxidase (EC 1.11.1.7)                                 | 36 | 6  | 38    | 7.3   | 0.0262 |
| 0.9699  | I1JK97     | Protein kinase domain-containing protein                 | 19 | 6  | 55.1  | 5.99  | 0.0097 |
| 0.9108  | I1MY43     | Vacuolar protein sorting-associated protein 35           | 15 | 7  | 90.3  | 5.43  | 0.0012 |
| 0.8914  | A0A0R0FN05 | Gamma-tubulin complex component                          | 7  | 3  | 75.3  | 7.11  | 0.0056 |
| 0.8697  | A0A0R0F5Y7 | WD_REPEATS_REGION domain-containing protein              | 18 | 14 | 121.9 | 5.52  | 0.0016 |
| 0.8570  | K7LD67     | Uncharacterized protein                                  | 67 | 18 | 41.7  | 5.49  | 0.0106 |
| 0.8547  | C6TFJ4     | Uncharacterized protein                                  | 38 | 3  | 15.3  | 8.13  | 0.0424 |
| 0.8269  | Q39834     | Clathrin heavy chain                                     | 45 | 55 | 193.2 | 5.55  | 0.0050 |
| 0.8230  | I1KSA4     | Uncharacterized protein                                  | 24 | 2  | 19.4  | 5.67  | 0.0467 |
| 0.8031  | K7LXR3     | Uncharacterized protein                                  | 6  | 2  | 83.1  | 6.95  | 0.0465 |
| 0.8024  | K7MFC0     | GYF domain-containing protein                            | 5  | 7  | 179.2 | 6.23  | 0.0070 |
| 0.7973  | I1KY70     | Uncharacterized protein                                  | 5  | 2  | 86    | 6.02  | 0.0461 |
| 0.7577  | I1M7P3     | Uncharacterized protein                                  | 34 | 2  | 14.7  | 4.93  | 0.0013 |
| 0.7497  | K7LK00     | Uncharacterized protein                                  | 4  | 2  | 83.4  | 6.04  | 0.0059 |
|         |            | ATP-dependent 6-phosphofructokinase (ATP-PFK)            |    |    |       |       |        |
| 0.7371  | I1N1M0     | (Phosphofructokinase) (EC 2.7.1.11) (Phosphohexokinase)  | 13 | 4  | 58.4  | 7.59  | 0.0301 |
| 0.7351  | I1LPZ3     | V-type proton ATPase subunit a                           | 27 | 15 | 92.9  | 5.96  | 0.0383 |
| 0.7234  | I1J547     | Aminotran_1_2 domain-containing protein                  | 35 | 11 | 53.5  | 5.69  | 0.0021 |
| 0.7136  | I1LQR8     | Uncharacterized protein                                  | 34 | 5  | 26.2  | 7.85  | 0.0189 |
| 0.7040  | I1K108     | Uncharacterized protein                                  | 52 | 18 | 69.1  | 7.93  | 0.0007 |
| 0.6986  | I1LGI3     | RanBD1 domain-containing protein                         | 8  | 2  | 39.1  | 7.18  | 0.0007 |
| 0.6906  | I1LLG6     | Uncharacterized protein                                  | 5  | 4  | 179.7 | 6.14  | 0.0129 |
| 0.6572  | C6T3E5     | MPN domain-containing protein                            | 39 | 4  | 22.9  | 5.78  | 0.0122 |
| 0.6489  | K7L9D8     | Kinesin motor domain-containing protein                  | 2  | 2  | 143.1 | 6.16  | 0.0263 |
| 0.6375  | I1L090     | Endoglucanase (EC 3.2.1.4)                               | 13 | 6  | 68.3  | 8.68  | 0.0206 |
| 0.6353  | I1JMK6     | Uncharacterized protein                                  | 16 | 3  | 52.2  | 5.81  | 0.0078 |
| 0.6304  | I1LF85     | RING-type domain-containing protein                      | 14 | 2  | 31.8  | 4.75  | 0.0246 |
| 0.6188  | I1JMY9     | Uncharacterized protein                                  | 20 | 5  | 48.9  | 6.3   | 0.0428 |
| 0.6125  | C5NTE6     | Uncharacterized protein                                  | 52 | 8  | 34.1  | 8.66  | 0.0338 |
| 0.5934  | I1MVM6     | Protein kinase domain-containing protein                 | 20 | 5  | 40.6  | 8.66  | 0.0238 |
| 0.5863  | I1LL06     | Carboxypeptidase (EC 3.4.16.-)                           | 17 | 5  | 54.6  | 6.76  | 0.0035 |
| -0.5958 | I1MXD1     | Uncharacterized protein                                  | 25 | 12 | 69.1  | 5.88  | 0.0405 |
| -0.6015 | C6T374     | VOC domain-containing protein                            | 61 | 4  | 15.4  | 5.69  | 0.0091 |
| -0.6030 | I1N8M4     | NAC-A/B domain-containing protein                        | 45 | 6  | 22    | 4.55  | 0.0030 |
| -0.6068 | I1NDE9     | Uncharacterized protein                                  | 24 | 8  | 54.4  | 4.73  | 0.0021 |
| -0.6151 | C6SX29     | ACT domain-containing protein                            | 22 | 2  | 16.6  | 4.7   | 0.0022 |
| -0.6160 | I1KB60     | Uncharacterized protein                                  | 10 | 2  | 60    | 5.22  | 0.0340 |
|         |            | Dihydrolipoamide acetyltransferase component of pyruvate |    |    |       |       |        |
| -0.6489 | I1LD65     | dehydrogenase complex (EC 2.3.1.-)                       | 34 | 9  | 48.9  | 8.82  | 0.0421 |
| -0.6571 | Q43468     | Hsp70-Hsp90 organizing protein 1 (GmHop-1)               | 17 | 7  | 64.1  | 5.69  | 0.0347 |
| -0.6769 | K7MVZ6     | Glucose-6-phosphate isomerase (EC 5.3.1.9)               | 37 | 10 | 62.7  | 5.72  | 0.0469 |
| -0.6783 | A0A0R0L3G5 | Amino_oxidase domain-containing protein                  | 5  | 3  | 66.8  | 7.87  | 0.0268 |
| -0.6870 | C6T394     | UBIQUITIN_CONJUGAT_2 domain-containing protein           | 11 | 2  | 17.9  | 5.07  | 0.0050 |
| -0.6887 | I1JXR7     | Exostosin domain-containing protein                      | 12 | 3  | 47.1  | 6.65  | 0.0012 |
| -0.6961 | K7KCU6     | Protein kinase domain-containing protein                 | 6  | 3  | 92    | 8.16  | 0.0447 |
| -0.7225 | I1K1I6     | Isocitrate dehydrogenase [NADP] (EC 1.1.1.42)            | 30 | 13 | 53.3  | 8.12  | 0.0158 |
| -0.7306 | C6SWA6     | Histone H2A                                              | 46 | 4  | 15.7  | 10.67 | 0.0140 |
| -0.7332 | C6SV65     | Histone H2A                                              | 44 | 3  | 14.7  | 10.36 | 0.0069 |
| -0.7615 | I1K042     | Uncharacterized protein                                  | 6  | 2  | 66.5  | 9.95  | 0.0127 |
| -0.7905 | A0A0R0EWR2 | PCI domain-containing protein                            | 12 | 4  | 52.9  | 6.76  | 0.0080 |
| -0.7933 | Q8RVH5     | Basic 7S globulin 2 (SBg7S) (Bg)                         | 40 | 8  | 47.2  | 8.25  | 0.0419 |

|         |            |                                               |    |    |       |       |        |
|---------|------------|-----------------------------------------------|----|----|-------|-------|--------|
| -0.8351 | M1FIS9     | Ribosomal protein S4                          | 11 | 3  | 41.3  | 11.22 | 0.0297 |
| -0.8426 | K7LDT9     | Uncharacterized protein                       | 9  | 5  | 103.3 | 6.76  | 0.0271 |
| -0.9010 | C6SXR9     | Uncharacterized protein                       | 15 | 3  | 26.1  | 8.05  | 0.0078 |
| -0.9039 | I1KYS8     | Uncharacterized protein                       | 12 | 3  | 41.1  | 7.85  | 0.0113 |
| -0.9336 | C6TN86     | Uncharacterized protein                       | 10 | 2  | 38.3  | 6     | 0.0223 |
| -0.9470 | I1JN48     | DNA gyrase subunit B (EC 5.6.2.3)             | 7  | 3  | 81.1  | 8.38  | 0.0060 |
| -0.9739 | I1LRK0     | DUF1279 domain-containing protein             | 15 | 2  | 20.4  | 9.41  | 0.0431 |
| -1.0228 | I1MDY6     | Uncharacterized protein                       | 5  | 2  | 60.6  | 9.51  | 0.0010 |
| -1.0284 | I1KKH2     | Importin N-terminal domain-containing protein | 6  | 3  | 114.8 | 5.68  | 0.0076 |
| -1.1939 | C6TE68     | Uncharacterized protein                       | 11 | 2  | 26.5  | 7.2   | 0.0307 |
| -1.1947 | A6BM07     | Isoflavone 7-O-glucosyltransferase 1          | 11 | 3  | 52    | 5.34  | 0.0114 |
| -1.2152 | I1N1G8     | PKS_ER domain-containing protein              | 14 | 4  | 41.9  | 8.94  | 0.0229 |
| -1.3584 | A0A0R0KL81 | Uncharacterized protein                       | 7  | 3  | 80.9  | 7.14  | 0.0037 |
| -1.4020 | A0A0R0G7V6 | Uncharacterized protein                       | 5  | 2  | 62.8  | 6.99  | 0.0105 |
| -1.5596 | I1LZW4     | Tr-type G domain-containing protein           | 16 | 11 | 109.9 | 5.24  | 0.0104 |
| -1.5825 | K7M549     | APC1_C domain-containing protein              | 3  | 2  | 201.2 | 6.27  | 0.0421 |
| -1.6023 | I1JSX4     | AAA domain-containing protein                 | 18 | 8  | 74.1  | 6.19  | 0.0010 |
| -1.6412 | I1L8V8     | Uncharacterized protein                       | 45 | 5  | 17.7  | 8.7   | 0.0114 |
| -1.7599 | A0A0R0HAG1 | Uncharacterized protein                       | 3  | 2  | 120.9 | 5.83  | 0.0048 |
| -1.7742 | I1LYM0     | DUF1681 domain-containing protein             | 23 | 4  | 30.7  | 6.68  | 0.0084 |
| -1.9360 | K7K3E3     | Uncharacterized protein                       | 4  | 3  | 147.9 | 5.27  | 0.0134 |
| -1.9552 | A0A0R0I9A1 | 3-ketoacyl-CoA synthase (EC 2.3.1.-)          | 14 | 4  | 56.1  | 8.9   | 0.0416 |
| -2.2526 | I1LHJ6     | SHNi-TPR domain-containing protein            | 23 | 6  | 50.1  | 4.54  | 0.0000 |
| -2.2675 | C6T390     | Uncharacterized protein                       | 55 | 6  | 16.2  | 5.91  | 0.0122 |
| -2.3826 | K7KVD9     | Uncharacterized protein                       | 4  | 2  | 73.5  | 6.42  | 0.0035 |
| -2.6470 | I1MFV0     | Uncharacterized protein                       | 11 | 9  | 152.5 | 6.19  | 0.0165 |
| -4.1073 | C6T020     | Glutathione peroxidase                        | 33 | 3  | 18.7  | 5.72  | 0.0129 |
| -4.3460 | K7K8V7     | C2 domain-containing protein                  | 2  | 3  | 229.9 | 5.62  | 0.0028 |
| -5.8382 | K7MPG5     | Uncharacterized protein                       | 28 | 6  | 42.4  | 8.29  | 0.0003 |

Abbreviation means as follows: Cov, coverage; MP, matched protein; MW, molecular weight; Cal, calculated.

Grey background is to proteins not considered to be differentially accumulated.

Supplemental Table S4. List of changed proteins in mutant line compared with wild type soybean under flooding

| Fold change | Accession  | Protein names                                            | Cov (%) | MP | MW (kDa) | calc pI | p-value |
|-------------|------------|----------------------------------------------------------|---------|----|----------|---------|---------|
| 3.3229      | C6T2R5     | RNase H domain-containing protein                        | 14      | 2  | 26.7     | 7.34    | 0.0017  |
| 3.2103      | I1JZK8     | t-SNARE coiled-coil homology domain-containing protein   | 10      | 2  | 33.3     | 7.14    | 0.0000  |
| 3.1314      | K7N4G1     | Uncharacterized protein                                  | 33      | 10 | 46.6     | 6.79    | 0.0408  |
| 3.0888      | I1NGD0     | Lipoxygenase (EC 1.13.11.-)                              | 12      | 6  | 97.9     | 6.7     | 0.0396  |
| 2.6669      | K7MQS3     | Peptidase A1 domain-containing protein                   | 16      | 3  | 52       | 8.12    | 0.0011  |
| 2.2582      | A0A0R0KUR1 | Phenylalanine ammonia-lyase (EC 4.3.1.24)                | 20      | 9  | 77.9     | 6.42    | 0.0070  |
| 2.0875      | C6T2W1     | SHSP domain-containing protein                           | 24      | 3  | 21.9     | 6.71    | 0.0285  |
| 1.9052      | I1K6B1     | NAB domain-containing protein                            | 5       | 4  | 139.4    | 4.94    | 0.0469  |
| 1.6802      | I1J7C0     | Uncharacterized protein                                  | 11      | 2  | 37.3     | 4.88    | 0.0035  |
| 1.6645      | I1MXD5     | Uncharacterized protein                                  | 6       | 2  | 53.2     | 5.58    | 0.0376  |
| 1.5914      | I1LM80     | Sucrose synthase (EC 2.4.1.13)                           | 5       | 3  | 95.7     | 6.99    | 0.0354  |
| 1.5010      | I1LRM9     | Uncharacterized protein                                  | 12      | 2  | 50.4     | 7.08    | 0.0368  |
| 1.4174      | I1L0J1     | Uncharacterized protein                                  | 5       | 2  | 52.9     | 5.16    | 0.0002  |
| 1.3421      | I1JK18     | Translocase of chloroplast (EC 3.6.5.-)                  | 23      | 4  | 34.9     | 9.33    | 0.0456  |
| 1.2353      | A0A0R0FUC5 | Uncharacterized protein                                  | 21      | 3  | 21.4     | 5.29    | 0.0135  |
| 1.2302      | I1KZ04     | Cytochrome b561 and DOMON domain-containing protein      | 13      | 3  | 43.2     | 9.38    | 0.0019  |
| 1.1109      | A8C8H5     | Glutamate decarboxylase (EC 4.1.1.15)                    | 59      | 19 | 57.2     | 5.82    | 0.0114  |
| 1.0686      | I1M8S3     | Uncharacterized protein                                  | 36      | 15 | 82.1     | 7.39    | 0.0290  |
| 1.0161      | A0A0R0GIU4 | Peroxidase (EC 1.11.1.7)                                 | 24      | 5  | 35.2     | 7.83    | 0.0179  |
| 0.9979      | C6SZQ8     | Phytocyanin domain-containing protein                    | 24      | 2  | 17.3     | 6.76    | 0.0333  |
| 0.9801      | I1L3X9     | Sucrose synthase (EC 2.4.1.13)                           | 11      | 6  | 104.1    | 7.06    | 0.0483  |
| 0.9769      | I1KM99     | Uncharacterized protein                                  | 30      | 8  | 54.6     | 4.68    | 0.0043  |
| 0.9042      | I1MHW9     | Uncharacterized protein                                  | 12      | 4  | 59.1     | 6.11    | 0.0322  |
| 0.8976      | I1KMW1     | Uncharacterized protein                                  | 23      | 3  | 27.6     | 6.02    | 0.0185  |
| 0.8642      | I1MX49     | Uncharacterized protein                                  | 22      | 6  | 46       | 6.35    | 0.0055  |
| 0.8383      | K7M8I6     | Uncharacterized protein                                  | 6       | 3  | 60.9     | 6.55    | 0.0339  |
| 0.8057      | I1MMC2     | t-SNARE coiled-coil homology domain-containing protein   | 18      | 3  | 30       | 6.32    | 0.0369  |
| 0.7693      | I1KMW4     | TPR_REGION domain-containing protein                     | 12      | 4  | 50       | 8.18    | 0.0013  |
| 0.7260      | K7KQQ0     | Uncharacterized protein                                  | 13      | 2  | 30.8     | 7.28    | 0.0450  |
| 0.6872      | I1J414     | Uncharacterized protein                                  | 8       | 3  | 38.4     | 5.86    | 0.0273  |
| 0.6297      | I1LF63     | Importin N-terminal domain-containing protein            | 30      | 14 | 99.4     | 5.05    | 0.0258  |
| 0.6210      | K7L479     | J domain-containing protein                              | 8       | 4  | 103.3    | 6.55    | 0.0483  |
| 0.6141      | C6SXC9     | Prefoldin subunit 4                                      | 34      | 3  | 14.7     | 4.46    | 0.0325  |
| -0.6020     | C6THF2     | Uncharacterized protein                                  | 14      | 2  | 31.5     | 5.36    | 0.0074  |
| -0.6234     | C6SVK3     | PITH domain-containing protein                           | 21      | 2  | 22.7     | 5.27    | 0.0401  |
| -0.6262     | I1LLG3     | Peptidase A1 domain-containing protein                   | 29      | 6  | 46.8     | 9.01    | 0.0064  |
| -0.6307     | A0A0R0KFR5 | Uncharacterized protein                                  | 13      | 2  | 31.6     | 9.55    | 0.0266  |
| -0.6356     | A0A0R0HN41 | Uncharacterized protein (Fragment)                       | 61      | 4  | 12       | 4.46    | 0.0370  |
| -0.6470     | I1J5A5     | Aldedh domain-containing protein                         | 50      | 16 | 58.4     | 6.84    | 0.0405  |
| -0.6534     | I1N5M3     | Elongation factor Ts, mitochondrial (EF-Ts) (EF-TsMt)    | 7       | 2  | 38.3     | 8.24    | 0.0008  |
| -0.6609     | C6FF81     | Receptor-like serine/threonine kinase                    | 7       | 6  | 146.9    | 7.65    | 0.0329  |
| -0.7104     | A0A0R0ICF9 | Pectinesterase (EC 3.1.1.11)                             | 20      | 2  | 35.4     | 6.34    | 0.0175  |
| -0.7245     | I1K108     | Uncharacterized protein                                  | 52      | 18 | 69.1     | 7.93    | 0.0004  |
| -0.7455     | I1KN20     | Uncharacterized protein                                  | 6       | 2  | 54.8     | 5.15    | 0.0476  |
| -0.7619     | I1N842     | Xyloglucan endotransglucosylase/hydrolase (EC 2.4.1.207) | 28      | 7  | 34.1     | 7.71    | 0.0315  |
| -0.7811     | K7LKM1     | Peptidase_M28 domain-containing protein                  | 10      | 5  | 99.7     | 7.62    | 0.0057  |
| -0.8115     | K7MAX3     | Uncharacterized protein                                  | 2       | 2  | 186.9    | 6.9     | 0.0324  |

|         |            |                                                                                                                           |    |    |       |       |        |
|---------|------------|---------------------------------------------------------------------------------------------------------------------------|----|----|-------|-------|--------|
| -0.8146 | I1M4L7     | Beta-galactosidase (EC 3.2.1.23)                                                                                          | 12 | 5  | 91.6  | 6.76  | 0.0037 |
| -0.8344 | I1KJ00     | Uncharacterized protein                                                                                                   | 14 | 3  | 28.2  | 5.43  | 0.0080 |
| -0.8413 | A0A0R4J508 | Expansin                                                                                                                  | 11 | 2  | 27.9  | 9.26  | 0.0401 |
| -0.8540 | C6SX09     | Uncharacterized protein (Fragment)                                                                                        | 34 | 7  | 29.2  | 6.35  | 0.0068 |
| -0.8553 | M1FIP8     | NADH-ubiquinone oxidoreductase chain 5 (EC 7.1.1.2)                                                                       | 9  | 4  | 74    | 7.84  | 0.0212 |
| -0.8553 | I1MCF0     | Uncharacterized protein                                                                                                   | 23 | 5  | 45.2  | 6.43  | 0.0220 |
| -0.8602 | C6SYC0     | Ribosomal_L18e/L15P domain-containing protein                                                                             | 16 | 3  | 27.6  | 10.99 | 0.0064 |
| -0.8715 | I1MY52     | PKS_ER domain-containing protein                                                                                          | 22 | 4  | 39.4  | 7.33  | 0.0322 |
| -0.9106 | C6TMZ4     | Fe2OG dioxygenase domain-containing protein                                                                               | 30 | 5  | 36    | 5.38  | 0.0348 |
| -0.9261 | K7MJA4     | Uncharacterized protein                                                                                                   | 1  | 2  | 186.8 | 7.14  | 0.0248 |
| -1.0106 | C6TNM5     | Uncharacterized protein                                                                                                   | 17 | 3  | 36.4  | 7.17  | 0.0291 |
| -1.0379 | I1N9W1     | Uncharacterized protein                                                                                                   | 5  | 5  | 161.4 | 8.87  | 0.0078 |
| -1.0807 | K7MNN1     | Aminotran_1_2 domain-containing protein                                                                                   | 12 | 3  | 52.8  | 7.94  | 0.0025 |
| -1.1474 | C6SXF0     | Uncharacterized protein                                                                                                   | 23 | 3  | 22.6  | 10.23 | 0.0028 |
| -1.1716 | I1M192     | Uncharacterized protein                                                                                                   | 26 | 5  | 33.3  | 5.81  | 0.0246 |
| -1.3723 | I1J730     | Peptidylprolyl isomerase (EC 5.2.1.8)                                                                                     | 18 | 7  | 69.9  | 5.57  | 0.0075 |
| -1.4347 | Q8RVH5     | Basic 7S globulin 2 (SBg7S) (Bg) [Cleaved into: Basic 7S globulin 2 high kDa subunit;Basic 7S globulin 2 low kDa subunit] | 40 | 8  | 47.2  | 8.25  | 0.0215 |
| -1.4648 | I1JNW2     | tRNA (guanine-N(7)-)-methyltransferase non-catalytic subunit (WD repeat-containing protein 4 homolog)                     | 16 | 3  | 44.7  | 5.91  | 0.0010 |
| -1.4756 | C6T3E5     | MPN domain-containing protein                                                                                             | 39 | 4  | 22.9  | 5.78  | 0.0204 |
| -1.5000 | I1JQZ9     | Uncharacterized protein                                                                                                   | 10 | 3  | 83.9  | 7.23  | 0.0421 |
| -1.5599 | Q2MJR4     | Myo-inositol-1-phosphate synthase                                                                                         | 40 | 9  | 56.4  | 5.67  | 0.0239 |
| -1.5804 | I1MNI2     | Uncharacterized protein                                                                                                   | 16 | 3  | 39.6  | 6.8   | 0.0033 |
| -1.7512 | C6TJK9     | Peptidyl-prolyl cis-trans isomerase (PPIase) (EC 5.2.1.8)                                                                 | 10 | 2  | 28.3  | 8.6   | 0.0022 |
| -1.8013 | Q8LGT8     | Phosphoglycerate mutase-like protein                                                                                      | 20 | 4  | 31.8  | 6.34  | 0.0144 |
| -1.8176 | I1MZV7     | Uncharacterized protein                                                                                                   | 5  | 2  | 49.6  | 8.68  | 0.0251 |
| -1.8636 | A0A0R0HMK4 | Uncharacterized protein                                                                                                   | 8  | 2  | 46.1  | 7.5   | 0.0365 |
| -2.0019 | I1KG57     | Uncharacterized protein                                                                                                   | 32 | 9  | 46.6  | 5.88  | 0.0414 |
| -2.0281 | K7LYU8     | Uncharacterized protein                                                                                                   | 7  | 2  | 66.9  | 7.18  | 0.0316 |
| -2.0787 | P26413     | Heat shock 70 kDa protein                                                                                                 | 53 | 25 | 70.8  | 5.49  | 0.0073 |
| -2.2675 | A0A0R0LJE6 | Uncharacterized protein                                                                                                   | 4  | 2  | 83.1  | 7.11  | 0.0280 |
| -2.4074 | I1MTI4     | Protein kinase domain-containing protein                                                                                  | 8  | 2  | 43.7  | 7.65  | 0.0454 |
| -2.6402 | I1K3E9     | CULLIN_2 domain-containing protein                                                                                        | 10 | 6  | 88.5  | 7.65  | 0.0029 |
| -2.8521 | C6TKV3     | DHO_dh domain-containing protein                                                                                          | 35 | 9  | 46.1  | 5.96  | 0.0090 |
| -2.8558 | I1M1T9     | ALOG domain-containing protein                                                                                            | 20 | 3  | 20.2  | 9.72  | 0.0078 |
| -3.1430 | I1KLU0     | Mitogen-activated protein kinase (EC 2.7.11.24)                                                                           | 27 | 7  | 49.9  | 5.96  | 0.0013 |
| -3.5487 | C6TJZ9     | Uncharacterized protein                                                                                                   | 16 | 5  | 38.7  | 5.01  | 0.0015 |
| -6.1028 | I1K2B5     | Uncharacterized protein                                                                                                   | 20 | 9  | 79.6  | 6.6   | 0.0033 |
| -6.7510 | I1LEX5     | Uncharacterized protein                                                                                                   | 28 | 6  | 42.9  | 4.84  | 0.0002 |

Abbreviation means as follows: Cov, coverage; MP, matched protein; MW, molecular weight; Cal, calculated.

Grey background is to proteins not considered to be differentially accumulated.
