# Supplementary material for: Proteomic and Biochemical Analyses of the Mechanism of Tolerance in Mutant Soybean Responding to Flooding Stress
Source: MDPI journal article supplement (doi:10.3390/ijms22169046), 2021-08-22
Supplement: s1 [file s1]

Supplemental Table S1. List of changed proteins in wild type soybean under flooding compared with non-flooding

| Fold change | Accession  | Protein names                                       | Cov (%) | MP | MW (kDa) | Calc pI | p-value |
|-------------|------------|-----------------------------------------------------|---------|----|----------|---------|---------|
| 11.0852     | Q0WX05     | Polygalacturonase inhibiting protein                | 50      | 10 | 36.8     | 8.34    | 0.0002  |
| 9.1702      | I1JY29     | Uncharacterized protein                             | 42      | 10 | 41.2     | 6.00    | 0.0019  |
| 8.1164      | C6TMH1     | ZnMc domain-containing protein                      | 12      | 2  | 40.1     | 5.63    | 0.0002  |
| 8.0471      | Q42785     | Nonsymbiotic hemoglobin                             | 22      | 3  | 18.0     | 8.92    | 0.0000  |
| 7.7919      | A0A0R0KF48 | Uncharacterized protein                             | 41      | 14 | 65.2     | 6.21    | 0.0000  |
| 7.1804      | C6T390     | Uncharacterized protein                             | 55      | 6  | 16.2     | 5.91    | 0.0000  |
| 7.0691      | I1LJK0     | Uncharacterized protein                             | 52      | 3  | 7.9      | 6.60    | 0.0017  |
| 7.0066      | I1NF01     | Uncharacterized protein                             | 13      | 8  | 80.1     | 6.13    | 0.0001  |
| 6.9769      | A0A0R0GEW3 | Uncharacterized protein                             | 11      | 3  | 30.6     | 6.80    | 0.0001  |
| 6.6448      | I1LL87     | Uncharacterized protein                             | 18      | 2  | 19.3     | 4.96    | 0.0011  |
| 6.5690      | I1L3I1     | Lectin_legB domain-containing protein               | 12      | 3  | 33.2     | 5.10    | 0.0003  |
| 6.4617      | I1K9M3     | Uncharacterized protein                             | 21      | 7  | 73.0     | 5.30    | 0.0001  |
| 6.3329      | C6TMB5     | Uncharacterized protein                             | 45      | 5  | 17.8     | 8.97    | 0.0011  |
| 6.1785      | C6TMH8     | Ribosomal protein L19                               | 21      | 2  | 24.7     | 11.44   | 0.0001  |
| 6.0694      | I1MV69     | Uncharacterized protein                             | 25      | 4  | 27.5     | 9.20    | 0.0019  |
| 5.8079      | I1KJ00     | Uncharacterized protein                             | 14      | 3  | 28.2     | 5.43    | 0.0020  |
| 5.7866      | I1KR99     | LRRNT_2 domain-containing protein                   | 16      | 3  | 37.4     | 7.91    | 0.0026  |
| 5.7015      | C6TFF5     | Uncharacterized protein                             | 26      | 2  | 11.1     | 10.45   | 0.0003  |
| 5.5797      | C6T229     | Uncharacterized protein                             | 32      | 2  | 8.0      | 8.84    | 0.0008  |
| 5.5748      | C6T9K9     | Elongation factor Tu                                | 49      | 17 | 49.8     | 7.05    | 0.0003  |
| 5.5168      | A0A0R0IID0 | Uncharacterized protein                             | 31      | 4  | 24.0     | 6.02    | 0.0031  |
| 5.4166      | C6TDV4     | LRRNT_2 domain-containing protein                   | 7       | 2  | 36.2     | 8.43    | 0.0004  |
| 5.2223      | Q0WX04     | Polygalacturonase inhibiting protein                | 19      | 3  | 37.5     | 8.91    | 0.0010  |
| 5.0100      | A0A0R0K553 | Fe2OG dioxygenase domain-containing protein         | 38      | 8  | 34.8     | 5.58    | 0.0003  |
| 4.8041      | I1KZW3     | Uncharacterized protein                             | 32      | 6  | 32.8     | 5.92    | 0.0005  |
| 4.6002      | C6SYA5     | 60S ribosomal protein L18a                          | 29      | 4  | 21.3     | 10.42   | 0.0004  |
| 4.4636      | I1LC49     | Peptidase A1 domain-containing protein              | 18      | 4  | 47.3     | 8.24    | 0.0051  |
| 4.3081      | I1LT24     | DUF3700 domain-containing protein                   | 33      | 6  | 28.0     | 6.68    | 0.0001  |
| 4.2615      | K7MID0     | Uncharacterized protein                             | 8       | 4  | 96.9     | 6.39    | 0.0000  |
| 4.2281      | I1K9W9     | Uncharacterized protein                             | 14      | 2  | 34.7     | 8.54    | 0.0023  |
| 4.1308      | A0A0R4J4G7 | Uncharacterized protein                             | 15      | 2  | 29.4     | 6.79    | 0.0010  |
| 4.1117      | I1KBD1     | Protein kinase domain-containing protein            | 4       | 2  | 129.2    | 6.74    | 0.0057  |
| 4.0226      | C6TC19     | Rhodanese domain-containing protein                 | 13      | 2  | 16.4     | 8.25    | 0.0020  |
| 3.9660      | I1K467     | Uncharacterized protein                             | 50      | 18 | 59.0     | 6.51    | 0.0002  |
| 3.9646      | I1KNR7     | Uncharacterized protein                             | 3       | 2  | 81.5     | 6.37    | 0.0486  |
| 3.9423      | I1NF42     | Uncharacterized protein                             | 17      | 5  | 43.5     | 4.84    | 0.0011  |
| 3.9361      | I1KP32     | UVR domain-containing protein                       | 39      | 23 | 102.1    | 6.80    | 0.0034  |
| 3.8956      | I1K657     | RPN13_C domain-containing protein                   | 35      | 5  | 36.1     | 4.44    | 0.0325  |
| 3.8932      | A0A0R4J4H3 | Nascent polypeptide-associated complex subunit beta | 67      | 11 | 17.7     | 7.40    | 0.0034  |
| 3.8755      | I1KMK2     | Uncharacterized protein                             | 4       | 3  | 162.5    | 8.13    | 0.0067  |
| 3.8491      | C6THW8     | DUF3700 domain-containing protein                   | 40      | 7  | 28.0     | 6.61    | 0.0000  |
| 3.8122      | I1N846     | Uncharacterized protein                             | 27      | 11 | 83.9     | 6.73    | 0.0088  |
| 3.8117      | I1JQU3     | AMP-binding domain-containing protein               | 6       | 2  | 74.4     | 7.18    | 0.0022  |
| 3.7880      | K7LSP6     | WD_REPEATS_REGION domain-containing protein         | 7       | 2  | 37.2     | 5.10    | 0.0086  |
| 3.7775      | C6TLA6     | DUF3700 domain-containing protein                   | 20      | 3  | 27.5     | 7.37    | 0.0001  |
| 3.7581      | C6T721     | Aldose 1-epimerase                                  | 13      | 3  | 40.6     | 9.28    | 0.0031  |
| 3.6824      | I1J8C9     | Rab proteins geranylgeranyl transferase component   | 13      | 3  | 60.6     | 4.87    | 0.0074  |
| 3.6663      | I1MQG3     | Uncharacterized protein                             | 28      | 3  | 22.2     | 5.21    | 0.0165  |
| 3.5975      | C6TKX3     | Uncharacterized protein                             | 8       | 2  | 27.2     | 6.40    | 0.0348  |
| 3.5068      | K7MFQ7     | Uncharacterized protein                             | 15      | 6  | 68.8     | 8.50    | 0.0003  |
| 3.5011      | I1JS15     | Uncharacterized protein                             | 5       | 3  | 116.8    | 6.58    | 0.0495  |
| 3.4511      | I1MAE6     | PKS_ER domain-containing protein                    | 39      | 11 | 40.8     | 6.52    | 0.0003  |

|        |            |                                                    |    |    |       |       |        |
|--------|------------|----------------------------------------------------|----|----|-------|-------|--------|
| 3.3270 | I1LVI3     | Uncharacterized protein                            | 12 | 9  | 100.1 | 9.07  | 0.0082 |
| 3.3245 | Q948X9     | Beta-conglycinin alpha-subunit                     | 7  | 3  | 72.4  | 5.40  | 0.0099 |
| 3.3153 | I1ME27     | Uncharacterized protein                            | 3  | 2  | 140.8 | 6.15  | 0.0068 |
| 3.3099 | C6TCK6     | Uncharacterized protein                            | 13 | 2  | 25.8  | 6.86  | 0.0005 |
| 3.2972 | C6SXR2     | Ribosomal protein L19                              | 21 | 2  | 24.6  | 11.44 | 0.0052 |
| 3.2893 | I1J6C3     | Arf-GAP domain-containing protein                  | 34 | 8  | 43.2  | 8.92  | 0.0013 |
| 3.2155 | I1KQE2     | Uncharacterized protein                            | 59 | 9  | 34.6  | 7.81  | 0.0230 |
| 3.1936 | A0A0R4J594 | Peroxidase (EC 1.11.1.7)                           | 24 | 5  | 34.8  | 7.90  | 0.0002 |
| 3.1859 | Q42447     | Maturation protein (Maturation-associated protein) | 27 | 3  | 25.6  | 6.52  | 0.0106 |
| 3.1785 | A0A0R0FZI3 | AB hydrolase-1 domain-containing protein           | 9  | 2  | 33.6  | 6.54  | 0.0097 |
| 3.1366 | P11827     | Beta-conglycinin alpha' subunit                    | 18 | 8  | 72.2  | 5.71  | 0.0091 |
| 3.1003 | K7MNG2     | Cytosolic Fe-S cluster assembly factor NBP35       | 30 | 6  | 38.2  | 4.84  | 0.0000 |
| 3.0608 | K7KRK2     | Uncharacterized protein                            | 17 | 3  | 31.5  | 6.44  | 0.0083 |
| 2.9956 | I1MBS4     | Usp domain-containing protein                      | 27 | 3  | 18.0  | 9.41  | 0.0120 |
| 2.9562 | I1M7P3     | Uncharacterized protein                            | 34 | 2  | 14.7  | 4.93  | 0.0001 |
| 2.9492 | I1LRQ2     | NEDD8-activating enzyme E1 regulatory subunit      | 21 | 5  | 57.9  | 5.24  | 0.0045 |
| 2.9418 | Q9SEL0     | Seed maturation protein PM24                       | 20 | 3  | 26.8  | 5.33  | 0.0043 |
| 2.9249 | I1NCN7     | Uncharacterized protein                            | 5  | 3  | 115.7 | 6.46  | 0.0042 |
| 2.9114 | I1LVS8     | Xyloglucan endotransglucosylase/hydrolase          | 10 | 2  | 33.2  | 8.02  | 0.0055 |
| 2.9062 | K7KSU9     | GYF domain-containing protein                      | 2  | 2  | 197.7 | 6.47  | 0.0353 |
| 2.9043 | A0A024BT07 | Acyl-[acyl-carrier-protein] desaturase             | 12 | 4  | 44.0  | 7.23  | 0.0000 |
| 2.8734 | Q01527     | Maturation protein                                 | 38 | 2  | 15.6  | 9.66  | 0.0013 |
| 2.8361 | C6TKW5     | MHD domain-containing protein                      | 7  | 2  | 49.7  | 7.18  | 0.0092 |
| 2.8335 | P26413     | Heat shock 70 kDa protein                          | 53 | 25 | 70.8  | 5.49  | 0.0026 |
| 2.8313 | A0A0R4J364 | Uncharacterized protein                            | 67 | 16 | 40.9  | 6.40  | 0.0008 |
| 2.7764 | K7LSZ2     | AA_TRNA_LIGASE_II domain-containing protein        | 15 | 5  | 62.8  | 6.49  | 0.0499 |
| 2.7744 | A0A0G4DBR5 | UDP-glycosyltransferase 79B30                      | 10 | 2  | 51.1  | 5.78  | 0.0049 |
| 2.7738 | I1KQV7     | Uncharacterized protein                            | 38 | 19 | 72.5  | 6.04  | 0.0201 |
| 2.7331 | P51061     | Phosphoenolpyruvate carboxylase                    | 52 | 39 | 110.7 | 6.47  | 0.0316 |
| 2.7146 | I1MN40     | VWFA domain-containing protein                     | 15 | 3  | 42.4  | 4.73  | 0.0022 |
| 2.7038 | I1M138     | Peptidase A1 domain-containing protein             | 10 | 3  | 51.2  | 8.00  | 0.0000 |
| 2.6976 | I1K0A8     | Uncharacterized protein                            | 28 | 9  | 48.5  | 5.40  | 0.0320 |
| 2.6834 | I1LIN3     | Uncharacterized protein                            | 10 | 2  | 25.2  | 5.63  | 0.0007 |
| 2.6484 | A0A0R0KSG7 | Ribosomal protein L19                              | 17 | 2  | 24.7  | 11.40 | 0.0033 |
| 2.6462 | C6TDA6     | Protein kinase domain-containing protein           | 7  | 2  | 50.9  | 4.54  | 0.0042 |
| 2.6432 | I1JG72     | PlsC domain-containing protein                     | 8  | 2  | 43.2  | 9.36  | 0.0412 |
| 2.6401 | I1JJ62     | Citrate synthase (EC 2.3.3.16)                     | 19 | 5  | 56.5  | 8.72  | 0.0416 |
| 2.6183 | Q9ZTY1     | 35 kDa seed maturation protein                     | 10 | 2  | 35.3  | 6.32  | 0.0004 |
| 2.6044 | A0A0R0KXL5 | Uncharacterized protein                            | 23 | 2  | 13.6  | 8.18  | 0.0000 |
| 2.5993 | K7MEI2     | Exocyst subunit Exo70 family protein               | 8  | 2  | 75.6  | 6.00  | 0.0126 |
| 2.5586 | I1MUP6     | Uncharacterized protein                            | 47 | 14 | 46.4  | 5.11  | 0.0001 |
| 2.5507 | A0A0B5E8W0 | Tau class glutathione S-transferase                | 28 | 4  | 25.9  | 6.15  | 0.0367 |
| 2.5316 | A0A0R4J2I4 | Uncharacterized protein                            | 43 | 16 | 65.6  | 5.94  | 0.0005 |
| 2.5243 | I1N627     | PHB domain-containing protein                      | 26 | 6  | 31.5  | 5.24  | 0.0081 |
| 2.4710 | C6TB96     | Uncharacterized protein                            | 22 | 5  | 35.2  | 5.49  | 0.0005 |
| 2.4707 | A0A0R0ENW6 | Peptidase A1 domain-containing protein             | 35 | 8  | 46.3  | 8.53  | 0.0149 |
| 2.4705 | I1JKK8     | SEC7 domain-containing protein                     | 9  | 11 | 198.7 | 5.66  | 0.0079 |
| 2.4531 | I1MWJ3     | Uncharacterized protein                            | 19 | 2  | 19.0  | 9.48  | 0.0151 |
| 2.4432 | I1MR73     | Uncharacterized protein                            | 4  | 2  | 58.0  | 8.90  | 0.0065 |
| 2.4345 | I1KLU0     | Mitogen-activated protein kinase (EC 2.7.11.24)    | 27 | 7  | 49.9  | 5.96  | 0.0378 |
| 2.4337 | C6TEY7     | Ubiquitin thioesterase (EC 3.4.19.12)              | 39 | 6  | 33.8  | 4.91  | 0.0002 |
| 2.4160 | I1MWZ7     | Aldedh domain-containing protein                   | 16 | 5  | 53.2  | 7.61  | 0.0138 |
| 2.3960 | I1MCF0     | Uncharacterized protein                            | 23 | 5  | 45.2  | 6.43  | 0.0024 |
| 2.3355 | I1K7R0     | Uncharacterized protein                            | 27 | 3  | 16.1  | 5.35  | 0.0028 |
| 2.3231 | K7KU37     | Uncharacterized protein                            | 2  | 2  | 147.2 | 5.94  | 0.0051 |
| 2.3132 | I1MEX0     | MPN domain-containing protein                      | 57 | 8  | 34.6  | 6.71  | 0.0000 |
| 2.2754 | C6T545     | Uncharacterized protein                            | 32 | 2  | 14.9  | 9.47  | 0.0494 |

|        |            |                                                 |    |    |       |       |        |
|--------|------------|-------------------------------------------------|----|----|-------|-------|--------|
| 2.2593 | C6TME1     | Uncharacterized protein                         | 32 | 9  | 35.8  | 9.58  | 0.0001 |
| 2.2067 | I1L7R7     | CTP synthase (EC 6.3.4.2) (UTP--ammonia ligase) | 9  | 3  | 61.6  | 6.05  | 0.0003 |
| 2.1869 | K7MVZ6     | Glucose-6-phosphate isomerase (EC 5.3.1.9)      | 37 | 10 | 62.7  | 5.72  | 0.0014 |
| 2.1606 | C6TN86     | Uncharacterized protein                         | 10 | 2  | 38.3  | 6.00  | 0.0087 |
| 2.1304 | I1LUZ1     | Uncharacterized protein                         | 11 | 3  | 64.0  | 5.53  | 0.0001 |
| 2.1301 | A0A0R0ETL8 | Uncharacterized protein                         | 33 | 13 | 64.3  | 8.15  | 0.0464 |
| 2.1169 | I1K586     | Protein kinase domain-containing protein        | 3  | 2  | 123.3 | 4.93  | 0.0170 |
| 2.1117 | I1N0X9     | Uncharacterized protein                         | 5  | 3  | 118.3 | 6.54  | 0.0047 |
| 2.0934 | K7LDT9     | Uncharacterized protein                         | 9  | 5  | 103.3 | 6.76  | 0.0005 |
| 2.0925 | I1MEH8     | Uncharacterized protein                         | 41 | 6  | 22.2  | 7.20  | 0.0000 |
| 2.0884 | I1LC12     | SHSP domain-containing protein                  | 30 | 4  | 22.4  | 6.02  | 0.0038 |
| 2.0805 | I1J8S7     | Uncharacterized protein                         | 46 | 7  | 29.3  | 6.73  | 0.0028 |
| 2.0792 | I1JCQ0     | Amino oxidase domain-containing protein         | 11 | 4  | 60.8  | 6.90  | 0.0040 |
| 2.0723 | P04670     | Uricase-2 isozyme 1                             | 46 | 12 | 35.1  | 7.97  | 0.0006 |
| 2.0700 | K7LG16     | Uncharacterized protein                         | 7  | 3  | 109.1 | 5.67  | 0.0045 |
| 2.0688 | I1MQK0     | Uncharacterized protein                         | 16 | 3  | 41.7  | 5.78  | 0.0007 |
| 2.0649 | K7LF33     | RBR-type E3 ubiquitin transferase (EC 2.3.2.31) | 10 | 3  | 68.2  | 5.26  | 0.0006 |
| 2.0629 | K7KNK3     | Uncharacterized protein                         | 26 | 2  | 11.2  | 10.96 | 0.0057 |
| 2.0577 | I1KU42     | Uncharacterized protein                         | 3  | 2  | 91.4  | 6.23  | 0.0319 |
| 2.0372 | C6TFW0     | Uncharacterized protein                         | 37 | 3  | 13.3  | 9.16  | 0.0007 |
| 2.0333 | I1N7M0     | RIBOSOMAL_L9 domain-containing protein          | 20 | 2  | 25.6  | 9.58  | 0.0167 |
| 2.0297 | K7L1E9     | Fe2OG dioxygenase domain-containing protein     | 15 | 3  | 34.7  | 5.71  | 0.0004 |
| 2.0037 | I1MRW2     | Importin N-terminal domain-containing protein   | 5  | 4  | 123.7 | 4.83  | 0.0002 |
| 1.9896 | I1L7V7     | Usp domain-containing protein                   | 30 | 2  | 17.2  | 7.87  | 0.0046 |
| 1.9880 | A0A0R0IH39 | Uncharacterized protein                         | 2  | 2  | 212.1 | 7.31  | 0.0013 |
| 1.9790 | C6SVT0     | Usp domain-containing protein                   | 42 | 6  | 18.0  | 7.15  | 0.0002 |
| 1.9635 | K7MDW5     | Uncharacterized protein                         | 14 | 20 | 247.4 | 5.91  | 0.0138 |
| 1.9303 | K7M034     | BED-type domain-containing protein              | 8  | 6  | 122.7 | 5.00  | 0.0014 |
| 1.9238 | K7MPT4     | TPR_REGION domain-containing protein            | 6  | 2  | 59.8  | 7.37  | 0.0015 |
| 1.9153 | A0A0R0KE56 | Pectinesterase (EC 3.1.1.11)                    | 27 | 5  | 32.2  | 8.70  | 0.0015 |
| 1.8894 | I1KUE9     | WD_REPEATS_REGION domain-containing protein     | 10 | 2  | 38.8  | 8.22  | 0.0034 |
| 1.8374 | C6SVM2     | Uncharacterized protein                         | 27 | 2  | 17.4  | 8.94  | 0.0014 |
| 1.7842 | C6K8D1     | Seed biotinylated protein 68 kDa isoform        | 23 | 9  | 67.9  | 6.58  | 0.0000 |
| 1.7762 | I1L3K7     | Uncharacterized protein                         | 64 | 17 | 48.0  | 6.29  | 0.0000 |
| 1.7754 | A0A0R0JDS4 | TP_methylase domain-containing protein          | 24 | 2  | 30.8  | 5.39  | 0.0164 |
| 1.7692 | C6TNN5     | ZnMc domain-containing protein                  | 29 | 7  | 43.4  | 6.10  | 0.0003 |
| 1.7635 | C6T063     | ANK_REP_REGION domain-containing protein        | 36 | 2  | 16.8  | 4.63  | 0.0296 |
| 1.7312 | I1LM96     | 60S ribosomal export protein NMD3               | 8  | 3  | 58.5  | 6.73  | 0.0057 |
| 1.7243 | I1LDX7     | Uncharacterized protein                         | 7  | 3  | 84.6  | 8.69  | 0.0110 |
| 1.7114 | K7K676     | AP-1 complex subunit gamma                      | 21 | 10 | 95.5  | 6.51  | 0.0058 |
| 1.7109 | I1J9W0     | 40S ribosomal protein S30                       | 11 | 2  | 11.6  | 12.07 | 0.0020 |
| 1.7070 | I1K301     | Uncharacterized protein                         | 59 | 7  | 14.8  | 5.71  | 0.0015 |
| 1.6980 | I1M1V8     | Uncharacterized protein                         | 56 | 18 | 63.4  | 6.11  | 0.0001 |
| 1.6830 | A0A0R0H3L4 | Poly [ADP-ribose] polymerase                    | 40 | 21 | 91.6  | 5.59  | 0.0005 |
| 1.6761 | K7KNP4     | Uncharacterized protein                         | 6  | 8  | 213.8 | 6.13  | 0.0019 |
| 1.6701 | I1MY42     | Uncharacterized protein                         | 2  | 2  | 135.6 | 7.58  | 0.0322 |
| 1.6539 | A0A0R0F3E0 | Histone H2A                                     | 21 | 2  | 15.5  | 10.71 | 0.0019 |
| 1.6363 | K7KUE8     | DFP domain-containing protein                   | 13 | 4  | 36.4  | 7.94  | 0.0497 |
| 1.6352 | K7MFC0     | GYF domain-containing protein                   | 5  | 7  | 179.2 | 6.23  | 0.0005 |
| 1.6333 | Q8RVH5     | Basic 7S globulin 2                             | 40 | 8  | 47.2  | 8.25  | 0.0188 |
| 1.6318 | I1LWI3     | PHB domain-containing protein                   | 29 | 7  | 31.5  | 5.24  | 0.0029 |
| 1.6277 | A0A0R4J3M4 | Uncharacterized protein                         | 41 | 15 | 65.1  | 6.27  | 0.0009 |
| 1.6203 | C6TIP6     | Uncharacterized protein                         | 10 | 3  | 54.5  | 8.25  | 0.0470 |
| 1.6199 | K7M5G4     | GYF domain-containing protein                   | 3  | 3  | 205.6 | 6.46  | 0.0129 |
| 1.6118 | K7KGC7     | Sucrose synthase (EC 2.4.1.13)                  | 41 | 31 | 92.2  | 6.13  | 0.0007 |
| 1.5894 | K7MZJ0     | Sucrose synthase (EC 2.4.1.13)                  | 47 | 33 | 92.2  | 6.38  | 0.0000 |

|        |            |                                                   |    |    |       |       |        |
|--------|------------|---------------------------------------------------|----|----|-------|-------|--------|
| 1.5794 | C6TE39     | Ubiquinone biosynthesis O-methyltransferase       | 18 | 3  | 31.8  | 6.44  | 0.0090 |
| 1.5789 | A0A0R4J387 | Chalcone-flavonone isomerase family protein       | 62 | 8  | 23.5  | 5.00  | 0.0020 |
| 1.5765 | I1KR17     | Uncharacterized protein                           | 21 | 3  | 32.5  | 8.76  | 0.0007 |
| 1.5345 | C6TEE9     | Uncharacterized protein                           | 55 | 10 | 30.4  | 6.09  | 0.0001 |
| 1.5315 | I1JIE0     | Ferritin (EC 1.16.3.1)                            | 38 | 8  | 28.1  | 6.89  | 0.0041 |
| 1.5218 | I1K9P4     | ZF-HD dimerization-type domain-containing protein | 18 | 2  | 32.4  | 6.52  | 0.0081 |
| 1.5174 | K7LKJ0     | HMA domain-containing protein                     | 48 | 3  | 8.6   | 6.60  | 0.0016 |
| 1.5173 | A0A0R0ELP2 | Lipase_GDSL domain-containing protein             | 17 | 4  | 43.7  | 8.60  | 0.0431 |
| 1.5024 | I1NFP9     | PB1 domain-containing protein                     | 19 | 6  | 78.2  | 6.30  | 0.0056 |
| 1.4970 | C6SW77     | Uncharacterized protein                           | 34 | 5  | 25.8  | 9.69  | 0.0065 |
| 1.4876 | I1K964     | Proteasome subunit beta (EC 3.4.25.1)             | 78 | 11 | 25.1  | 5.55  | 0.0045 |
| 1.4810 | I1NA37     | Uncharacterized protein                           | 35 | 4  | 21.0  | 6.93  | 0.0081 |
| 1.4781 | A0A0R0GAQ3 | WD_REPEATS_REGION domain-containing protein       | 18 | 5  | 52.5  | 8.91  | 0.0222 |
| 1.4710 | A0A368UH26 | Uncharacterized protein                           | 17 | 2  | 21.8  | 6.01  | 0.0089 |
| 1.4696 | I1JET8     | Uncharacterized protein                           | 6  | 2  | 56.9  | 6.48  | 0.0279 |
| 1.4681 | I1N7K5     | UBX domain-containing protein                     | 20 | 2  | 29.1  | 7.18  | 0.0157 |
| 1.4581 | Q9SWB2     | Seed maturation protein PM41                      | 31 | 2  | 8.2   | 4.97  | 0.0415 |
| 1.4576 | C6TN05     | Hypersensitive induced reaction protein 4         | 12 | 2  | 32.6  | 5.31  | 0.0134 |
| 1.4419 | Q9XET0     | Seed maturation protein PM30                      | 30 | 4  | 15.1  | 8.90  | 0.0000 |
| 1.4330 | A0A0R0J2N5 | Uncharacterized protein                           | 10 | 2  | 29.7  | 6.73  | 0.0075 |
| 1.4321 | I1MGH2     | Fn3_like domain-containing protein                | 13 | 7  | 84.0  | 8.15  | 0.0230 |
| 1.4321 | A0A0R0F259 | Uncharacterized protein                           | 41 | 14 | 65.2  | 6.21  | 0.0140 |
| 1.4166 | A0A0R0EPA1 | Uncharacterized protein                           | 16 | 2  | 30.5  | 9.09  | 0.0262 |
| 1.3963 | I1JU00     | SHSP domain-containing protein                    | 15 | 2  | 17.9  | 7.18  | 0.0004 |
| 1.3755 | I1L8X8     | DUF5311 domain-containing protein                 | 2  | 2  | 169.3 | 5.87  | 0.0006 |
| 1.3681 | A0A0R4J2Q1 | Peptidase A1 domain-containing protein            | 27 | 8  | 46.4  | 8.34  | 0.0023 |
| 1.3651 | A0A0R0JL19 | Uncharacterized protein                           | 70 | 17 | 41.0  | 6.40  | 0.0001 |
| 1.3623 | I1JLC8     | Protein SLE2                                      | 35 | 3  | 11.5  | 5.60  | 0.0005 |
| 1.3526 | I1MUR0     | UBX domain-containing protein                     | 20 | 8  | 65.5  | 4.73  | 0.0020 |
| 1.3233 | I1MX00     | Protein kinase domain-containing protein          | 9  | 4  | 75.5  | 6.42  | 0.0072 |
| 1.3199 | I1J7T0     | Pectinesterase (EC 3.1.1.11)                      | 20 | 7  | 56.5  | 9.01  | 0.0118 |
| 1.3173 | K7MNN1     | Aminotran_1_2 domain-containing protein           | 12 | 3  | 52.8  | 7.94  | 0.0000 |
| 1.3010 | I1J4D5     | Uncharacterized protein                           | 41 | 6  | 26.6  | 5.90  | 0.0003 |
| 1.2938 | I1M3A7     | Uncharacterized protein                           | 12 | 3  | 63.8  | 5.73  | 0.0104 |
| 1.2933 | I1JAV9     | Pectinesterase (EC 3.1.1.11)                      | 36 | 13 | 61.0  | 8.59  | 0.0365 |
| 1.2838 | Q8LGT8     | Phosphoglycerate mutase-like protein              | 20 | 4  | 31.8  | 6.34  | 0.0053 |
| 1.2738 | I1KQB7     | Uncharacterized protein                           | 10 | 9  | 162.8 | 5.99  | 0.0021 |
| 1.2567 | I1M307     | Bulb-type lectin domain-containing protein        | 19 | 7  | 48.8  | 6.64  | 0.0059 |
| 1.2508 | K7LLK0     | Uncharacterized protein                           | 19 | 9  | 88.2  | 5.15  | 0.0416 |
| 1.2499 | I1L5Z2     | Aldose 1-epimerase                                | 28 | 6  | 40.7  | 9.32  | 0.0468 |
| 1.2483 | I1KSE3     | ALOG domain-containing protein                    | 20 | 2  | 18.8  | 9.88  | 0.0497 |
| 1.2460 | I1KG22     | Uncharacterized protein                           | 10 | 4  | 84.8  | 5.94  | 0.0010 |
| 1.2447 | I1MJC0     | Protein kinase domain-containing protein          | 3  | 2  | 139.5 | 5.21  | 0.0230 |
| 1.2397 | I1MKC8     | Starch synthase, chloroplastic/amyloplasti        | 26 | 10 | 68.1  | 7.06  | 0.0001 |
| 1.2377 | A0A0R0L1W4 | Glycosyltransferase                               | 16 | 5  | 56.7  | 6.58  | 0.0211 |
| 1.2239 | K7LM54     | Rab-GAP TBC domain-containing protein             | 15 | 8  | 93.2  | 4.83  | 0.0034 |
| 1.2219 | I1M3D5     | Arf-GAP domain-containing protein                 | 12 | 4  | 52.3  | 8.43  | 0.0083 |
| 1.2139 | A0A0R0ESZ7 | Uncharacterized protein                           | 19 | 2  | 19.6  | 4.65  | 0.0310 |
| 1.2126 | I1LKD9     | Protein transport protein Sec61 subunit beta      | 41 | 4  | 10.9  | 11.65 | 0.0092 |
| 1.2092 | C6TFE2     | Uncharacterized protein                           | 26 | 3  | 22.6  | 8.95  | 0.0106 |
| 1.2090 | C6T9H6     | Uncharacterized protein                           | 26 | 5  | 42.3  | 7.56  | 0.0050 |
| 1.2052 | K7MP42     | Ubiquitin-like domain-containing protein          | 14 | 9  | 98.7  | 5.43  | 0.0123 |
| 1.2049 | I1M2S7     | Lactamase_B domain-containing protein             | 47 | 15 | 41.4  | 8.72  | 0.0012 |
| 1.2037 | A0A0R0ICF9 | Pectinesterase (EC 3.1.1.11)                      | 20 | 2  | 35.4  | 6.34  | 0.0001 |
| 1.1981 | I1MPF6     | Uncharacterized protein                           | 31 | 7  | 40.4  | 5.27  | 0.0002 |
| 1.1950 | I1MVM6     | Protein kinase domain-containing protein          | 20 | 5  | 40.6  | 8.66  | 0.0017 |
| 1.1816 | I1K072     | Uncharacterized protein                           | 33 | 16 | 77.3  | 5.14  | 0.0038 |

|        |            |                                             |    |    |       |       |        |
|--------|------------|---------------------------------------------|----|----|-------|-------|--------|
| 1.1815 | O23959     | Ca+2-binding EF hand protein                | 23 | 4  | 27.0  | 6.44  | 0.0224 |
| 1.1814 | Q9MAZ9     | Nonclathrin coat protein zeta1-COP          | 46 | 4  | 20.1  | 4.86  | 0.0002 |
| 1.1751 | I1N3Y0     | Uncharacterized protein                     | 15 | 4  | 46.1  | 7.05  | 0.0007 |
| 1.1747 | I1KMS6     | Uncharacterized protein                     | 28 | 4  | 19.0  | 7.50  | 0.0023 |
| 1.1743 | I1L437     | PHB domain-containing protein               | 46 | 9  | 31.8  | 9.72  | 0.0345 |
| 1.1736 | I1L0W9     | Uncharacterized protein                     | 18 | 9  | 85.2  | 8.13  | 0.0010 |
| 1.1726 | A0A0R0FSB9 | Uncharacterized protein                     | 49 | 2  | 11.2  | 9.20  | 0.0135 |
| 1.1713 | K7KSA3     | Uncharacterized protein                     | 3  | 2  | 119.9 | 6.46  | 0.0218 |
| 1.1704 | I1MYR9     | Uncharacterized protein                     | 24 | 3  | 20.0  | 10.36 | 0.0001 |
| 1.1661 | I1J8U0     | Uncharacterized protein                     | 16 | 4  | 45.6  | 6.37  | 0.0327 |
| 1.1659 | I1MJS7     | RRM domain-containing protein               | 2  | 2  | 97.5  | 6.35  | 0.0230 |
| 1.1652 | Q2PMQ3     | DNA-directed RNA polymerase subunit alph    | 20 | 4  | 38.7  | 7.56  | 0.0076 |
| 1.1579 | C6T3U6     | Ribosomal protein L19                       | 17 | 2  | 24.8  | 11.44 | 0.0001 |
| 1.1467 | A0A0R0JWL2 | Uncharacterized protein                     | 45 | 4  | 21.2  | 8.47  | 0.0069 |
| 1.1366 | I1LLG6     | Uncharacterized protein                     | 5  | 4  | 179.7 | 6.14  | 0.0008 |
| 1.1320 | K7MZI8     | Pectinesterase (EC 3.1.1.11)                | 24 | 9  | 67.9  | 8.40  | 0.0182 |
| 1.1308 | I1KTY1     | Protein kinase domain-containing protein    | 4  | 3  | 138.0 | 5.81  | 0.0000 |
| 1.1304 | A8IFI1     | S1 ribosomal protein                        | 24 | 3  | 23.4  | 10.27 | 0.0365 |
| 1.1245 | A0A0R0GZ36 | Uncharacterized protein                     | 48 | 9  | 41.3  | 5.99  | 0.0005 |
| 1.1201 | I1LSH5     | Uncharacterized protein                     | 6  | 2  | 44.7  | 9.64  | 0.0052 |
| 1.1157 | I1LJ29     | Uncharacterized protein                     | 25 | 4  | 27.1  | 6.80  | 0.0158 |
| 1.1110 | A0A0R0I3N7 | WD_REPEATS_REGION domain-containing protein | 17 | 5  | 52.6  | 8.94  | 0.0071 |
| 1.1024 | I1JV82     | TPR_REGION domain-containing protein        | 32 | 4  | 24.1  | 8.70  | 0.0228 |
| 1.1016 | I1LJA4     | Nop domain-containing protein               | 29 | 10 | 60.8  | 9.03  | 0.0045 |
| 1.1014 | I1MKY3     | Uncharacterized protein                     | 40 | 4  | 12.6  | 6.74  | 0.0155 |
| 1.1014 | I1LUJ6     | PHB domain-containing protein               | 47 | 10 | 37.1  | 9.63  | 0.0245 |
| 1.1010 | K7MIR3     | Enolase_C domain-containing protein         | 67 | 15 | 38.3  | 6.80  | 0.0009 |
| 1.0996 | A0A0R0E8N5 | Uricase (EC 1.7.3.3) (Urate oxidase)        | 62 | 15 | 35.1  | 8.29  | 0.0004 |
| 1.0912 | I1NAS0     | EF-hand domain-containing protein           | 9  | 3  | 47.3  | 5.49  | 0.0078 |
| 1.0896 | I1JQI7     | Thioredox_DsbH domain-containing protein    | 12 | 6  | 90.9  | 6.43  | 0.0000 |
| 1.0852 | I1NEU8     | Aminotran_5 domain-containing protein       | 23 | 6  | 49.5  | 7.31  | 0.0095 |
| 1.0842 | K7MR36     | Citrate synthase (EC 2.3.3.16)              | 30 | 9  | 56.6  | 9.38  | 0.0120 |
| 1.0778 | A0A0R0F5Y7 | WD_REPEATS_REGION domain-containing protein | 18 | 14 | 121.9 | 5.52  | 0.0004 |
| 1.0759 | I1KW20     | PHB domain-containing protein               | 35 | 7  | 30.5  | 8.35  | 0.0343 |
| 1.0683 | I1LP93     | Phospholipid scramblase                     | 12 | 3  | 40.2  | 9.57  | 0.0015 |
| 1.0683 | Q8W198     | Phosphate transporter                       | 36 | 12 | 36.3  | 9.04  | 0.0001 |
| 1.0644 | K7MQ23     | Uncharacterized protein                     | 12 | 5  | 62.2  | 6.99  | 0.0009 |
| 1.0544 | I1L957     | Uncharacterized protein                     | 33 | 11 | 48.8  | 6.42  | 0.0006 |
| 1.0525 | A0A0A8WHK7 | Expansin                                    | 25 | 4  | 27.5  | 8.84  | 0.0151 |
| 1.0519 | A0A0R4J2T3 | Uncharacterized protein                     | 40 | 14 | 65.3  | 5.25  | 0.0018 |
| 1.0477 | C6T9B1     | cobW domain-containing protein              | 53 | 9  | 31.4  | 6.48  | 0.0006 |
| 1.0474 | I1J9W3     | J domain-containing protein                 | 4  | 2  | 59.9  | 9.09  | 0.0393 |
| 1.0459 | K7L3H1     | Uncharacterized protein                     | 11 | 3  | 47.7  | 9.85  | 0.0470 |
| 1.0439 | A0A0R0HN41 | Uncharacterized protein                     | 61 | 4  | 12.0  | 4.46  | 0.0236 |
| 1.0431 | Q948P5     | Ferritin-4, chloroplastic                   | 46 | 9  | 27.5  | 5.96  | 0.0120 |
| 1.0413 | I1KDR0     | Uncharacterized protein                     | 64 | 16 | 57.1  | 5.39  | 0.0007 |
| 1.0367 | C6TMZ4     | Fe2OG dioxygenase domain-containing protein | 30 | 5  | 36.0  | 5.38  | 0.0054 |
| 1.0359 | K7M9T4     | PUA domain-containing protein               | 8  | 2  | 66.2  | 9.25  | 0.0034 |
| 1.0323 | I1MDA0     | Uncharacterized protein                     | 19 | 2  | 17.1  | 10.17 | 0.0079 |
| 1.0304 | I1KYL4     | ER membrane protein complex subunit 3       | 26 | 5  | 27.8  | 8.97  | 0.0010 |
| 1.0294 | I1KW16     | Uncharacterized protein                     | 42 | 3  | 9.3   | 9.16  | 0.0162 |
| 1.0276 | I1LLT9     | Uncharacterized protein                     | 13 | 3  | 49.2  | 8.78  | 0.0024 |
| 1.0242 | C6T321     | Clat_adaptor_s domain-containing protein    | 21 | 2  | 19.7  | 4.86  | 0.0006 |
| 1.0145 | C6SWV4     | Uncharacterized protein                     | 40 | 5  | 18.8  | 6.32  | 0.0026 |
| 1.0143 | I1JA23     | Phospholipase D (EC 3.1.4.4)                | 4  | 3  | 96.0  | 7.75  | 0.0042 |
| 1.0120 | I1M099     | Uncharacterized protein                     | 16 | 4  | 31.4  | 9.67  | 0.0482 |

|        |            |                                                |    |    |       |      |        |
|--------|------------|------------------------------------------------|----|----|-------|------|--------|
| 1.0089 | I1LS05     | Uncharacterized protein                        | 34 | 7  | 45.8  | 7.02 | 0.0010 |
| 1.0061 | I1KQG0     | T-complex protein 1 subunit delta              | 66 | 22 | 57.6  | 7.28 | 0.0145 |
| 1.0035 | K7KBB0     | Phi class glutathione S-transferase            | 39 | 6  | 24.8  | 6.30 | 0.0078 |
| 1.0023 | I1J626     | Uncharacterized protein                        | 4  | 2  | 73.1  | 7.87 | 0.0276 |
| 1.0007 | I1LDP2     | Uncharacterized protein                        | 16 | 4  | 27.9  | 8.92 | 0.0004 |
| 0.9995 | A0A0R0EXK4 | Uncharacterized protein                        | 15 | 7  | 70.7  | 8.37 | 0.0470 |
| 0.9984 | I1LPA6     | Uncharacterized protein                        | 12 | 4  | 38.8  | 8.31 | 0.0312 |
| 0.9952 | I1JSN6     | Usp domain-containing protein                  | 24 | 2  | 19.9  | 6.33 | 0.0082 |
| 0.9842 | I1KX25     | Arf-GAP domain-containing protein              | 47 | 11 | 43.4  | 8.92 | 0.0014 |
| 0.9818 | I1MY43     | Vacuolar protein sorting-associated protein 35 | 15 | 7  | 90.3  | 5.43 | 0.0047 |
| 0.9800 | I1LSS9     | Flavodoxin-like domain-containing protein      | 37 | 5  | 21.8  | 5.57 | 0.0176 |
| 0.9797 | I1LTF0     | Uncharacterized protein                        | 14 | 3  | 51.8  | 8.78 | 0.0031 |
| 0.9796 | C6SZK3     | Glutathione peroxidase                         | 44 | 5  | 18.4  | 7.09 | 0.0001 |
| 0.9791 | I1JXA0     | Uncharacterized protein                        | 54 | 33 | 90.8  | 5.24 | 0.0016 |
| 0.9784 | I1NHP3     | Uncharacterized protein                        | 25 | 2  | 15.6  | 9.09 | 0.0005 |
| 0.9775 | K7MVR5     | Methionine aminopeptidase 2                    | 16 | 3  | 48.2  | 6.48 | 0.0103 |
| 0.9775 | I1KCD7     | Uncharacterized protein                        | 40 | 26 | 90.9  | 5.24 | 0.0133 |
| 0.9758 | Q39834     | Clathrin heavy chain                           | 45 | 55 | 193.2 | 5.55 | 0.0020 |
| 0.9753 | I1N5N0     | Pyruvate kinase (EC 2.7.1.40)                  | 55 | 19 | 55.2  | 7.56 | 0.0010 |
| 0.9746 | I1LR42     | Uncharacterized protein                        | 5  | 3  | 93.8  | 4.59 | 0.0091 |
| 0.9659 | I1LUW6     | Arf-GAP domain-containing protein              | 7  | 3  | 52.5  | 8.43 | 0.0146 |
| 0.9635 | I1LN49     | Uncharacterized protein                        | 50 | 8  | 27.0  | 7.06 | 0.0000 |
| 0.9634 | I1JH91     | Uncharacterized protein                        | 5  | 2  | 92.3  | 6.65 | 0.0079 |
| 0.9590 | I1KWA0     | Uncharacterized protein                        | 39 | 16 | 65.2  | 4.83 | 0.0106 |
| 0.9580 | I1NC18     | Glutathione synthetase                         | 37 | 13 | 60.8  | 7.28 | 0.0053 |
| 0.9548 | I1MBI9     | Peroxidase (EC 1.11.1.7)                       | 26 | 7  | 40.0  | 9.54 | 0.0259 |
| 0.9516 | A0A0R0EEE4 | HMA domain-containing protein                  | 32 | 3  | 13.6  | 7.72 | 0.0399 |
| 0.9515 | I1K0C8     | UBX domain-containing protein                  | 26 | 9  | 65.7  | 4.73 | 0.0047 |
| 0.9493 | K7LQ69     | Poly [ADP-ribose] polymerase                   | 38 | 20 | 91.1  | 5.43 | 0.0018 |
| 0.9469 | A0A368UH41 | TOG domain-containing protein                  | 14 | 9  | 118.8 | 6.76 | 0.0031 |
| 0.9433 | I1JLY3     | Peptidylprolyl isomerase (EC 5.2.1.8)          | 17 | 7  | 69.9  | 5.53 | 0.0270 |
| 0.9389 | I1JJC9     | Uncharacterized protein                        | 5  | 2  | 61.6  | 8.07 | 0.0190 |
| 0.9384 | A0A0R0G0T0 | PfkB domain-containing protein                 | 33 | 9  | 37.9  | 5.63 | 0.0012 |
| 0.9311 | I1LPC3     | Uncharacterized protein                        | 28 | 21 | 134.7 | 6.58 | 0.0087 |
| 0.9294 | I1JUR9     | Uncharacterized protein                        | 8  | 2  | 37.8  | 8.78 | 0.0057 |
| 0.9207 | I1JYF7     | PHB domain-containing protein                  | 43 | 12 | 43.9  | 9.11 | 0.0147 |
| 0.9161 | I1KLY3     | Abhydrolase_3 domain-containing protein        | 11 | 2  | 35.0  | 5.76 | 0.0235 |
| 0.9048 | Q84ZV2     | Uncharacterized protein                        | 33 | 2  | 11.3  | 9.13 | 0.0025 |
| 0.9040 | I1LNJ4     | SAM_MT_RSMB_NOP domain-containing protein      | 3  | 2  | 91.5  | 6.10 | 0.0432 |
| 0.9000 | Q39801     | 51 kDa seed maturation protein                 | 25 | 10 | 51.0  | 7.11 | 0.0058 |
| 0.8976 | K7LRE0     | Uncharacterized protein                        | 24 | 4  | 10.3  | 5.21 | 0.0041 |
| 0.8967 | B6CAM2     | Matrix metalloproteinase                       | 17 | 5  | 44.0  | 5.86 | 0.0152 |
| 0.8937 | I1MK76     | Pectinesterase (EC 3.1.1.11)                   | 20 | 7  | 54.7  | 7.75 | 0.0128 |
| 0.8882 | I1LGL4     | Uncharacterized protein                        | 26 | 6  | 45.1  | 7.20 | 0.0057 |
| 0.8868 | I1K4P5     | Uncharacterized protein                        | 10 | 2  | 40.2  | 5.45 | 0.0063 |
| 0.8790 | I1MBD1     | Clathrin heavy chain                           | 37 | 43 | 192.7 | 5.36 | 0.0429 |
| 0.8765 | A0A0R0JRB0 | L-lactate dehydrogenase (EC 1.1.1.27)          | 51 | 10 | 37.8  | 7.02 | 0.0005 |
| 0.8744 | K7LRS0     | Bac_surface_Ag domain-containing protein       | 9  | 3  | 59.1  | 5.52 | 0.0199 |
| 0.8736 | I1M0K3     | Cysteine proteinase inhibitor                  | 50 | 9  | 27.7  | 7.08 | 0.0008 |
| 0.8728 | I1LGI3     | RanBD1 domain-containing protein               | 8  | 2  | 39.1  | 7.18 | 0.0139 |
| 0.8705 | I1KJ35     | Uncharacterized protein                        | 27 | 11 | 58.7  | 8.97 | 0.0326 |
| 0.8699 | C6SWI0     | Thioredoxin domain-containing protein          | 16 | 3  | 26.1  | 5.29 | 0.0009 |
| 0.8659 | I1L0S5     | Uncharacterized protein                        | 40 | 5  | 19.0  | 6.93 | 0.0033 |
| 0.8635 | I1MMG2     | Uncharacterized protein                        | 20 | 5  | 40.8  | 5.92 | 0.0323 |
| 0.8632 | C6SZ12     | U6 snRNA-associated Sm-like protein LSm1       | 27 | 2  | 14.5  | 5.07 | 0.0426 |
| 0.8632 | Q39871     | Late embryogenesis abundant protein            | 25 | 9  | 50.6  | 6.67 | 0.0112 |

|        |            |                                             |    |    |       |       |        |
|--------|------------|---------------------------------------------|----|----|-------|-------|--------|
| 0.8606 | C6SZ11     | Uncharacterized protein                     | 46 | 7  | 27.0  | 6.92  | 0.0297 |
| 0.8593 | I1J7C8     | Peptidase_M24 domain-containing protein     | 44 | 11 | 42.9  | 6.76  | 0.0001 |
| 0.8585 | I1LG74     | NAD(P)-bd_dom domain-containing protein     | 16 | 5  | 42.7  | 7.28  | 0.0190 |
| 0.8585 | C6T294     | zf-Tim10_DDP domain-containing protein      | 51 | 4  | 10.9  | 7.21  | 0.0331 |
| 0.8578 | I1MMH5     | Pectin acetylesterase                       | 50 | 15 | 45.8  | 8.32  | 0.0299 |
| 0.8575 | K7LJP8     | Uncharacterized protein                     | 11 | 9  | 182.3 | 6.24  | 0.0009 |
| 0.8563 | C6SWV3     | Uncharacterized protein                     | 66 | 11 | 27.6  | 6.10  | 0.0001 |
| 0.8551 | A1YZE0     | Starch synthase, chloroplastic/amyloplastic | 24 | 9  | 68.0  | 7.06  | 0.0030 |
| 0.8535 | C6T1E1     | t-SNARE coiled-coil homology protein        | 44 | 4  | 14.4  | 5.90  | 0.0001 |
| 0.8512 | I1KIT0     | Uncharacterized protein                     | 12 | 2  | 53.9  | 6.46  | 0.0337 |
| 0.8488 | I1M222     | Uncharacterized protein                     | 29 | 6  | 25.6  | 5.68  | 0.0292 |
| 0.8449 | A0A0R0IJV1 | Uncharacterized protein                     | 26 | 7  | 36.9  | 8.27  | 0.0445 |
| 0.8413 | I1LBM1     | Uncharacterized protein                     | 10 | 3  | 57.9  | 9.17  | 0.0025 |
| 0.8406 | I1M8R6     | WPP domain-containing protein               | 22 | 2  | 13.1  | 4.60  | 0.0459 |
| 0.8395 | B1ACD0     | Kunitz trypsin inhibitor p20-1-like protein | 25 | 3  | 22.7  | 5.58  | 0.0194 |
| 0.8376 | C6T2S4     | Uncharacterized protein                     | 55 | 7  | 22.2  | 7.47  | 0.0002 |
| 0.8369 | K7MQM3     | C2 domain-containing protein                | 26 | 8  | 46.5  | 4.67  | 0.0055 |
| 0.8367 | I1JUR5     | S5 DRBM domain-containing protein           | 14 | 4  | 57.1  | 6.70  | 0.0069 |
| 0.8365 | K7KZN7     | Uncharacterized protein                     | 16 | 13 | 129.9 | 7.96  | 0.0020 |
| 0.8353 | Q39873     | Lea protein                                 | 22 | 8  | 49.4  | 7.52  | 0.0160 |
| 0.8340 | I1KEY3     | J domain-containing protein                 | 19 | 4  | 38.4  | 9.04  | 0.0154 |
| 0.8292 | I1KV60     | RuvB-like helicase (EC 3.6.4.12)            | 22 | 6  | 50.2  | 5.82  | 0.0066 |
| 0.8289 | C6T9Z5     | Formate dehydrogenase, mitochondrial        | 58 | 15 | 42.8  | 6.77  | 0.0031 |
| 0.8283 | I1LQR8     | Uncharacterized protein                     | 34 | 5  | 26.2  | 7.85  | 0.0079 |
| 0.8273 | I1K1V3     | Uncharacterized protein                     | 16 | 2  | 17.3  | 5.30  | 0.0240 |
| 0.8251 | I1LF85     | RING-type domain-containing protein         | 14 | 2  | 31.8  | 4.75  | 0.0381 |
| 0.8247 | I1JAU2     | Uncharacterized protein                     | 25 | 9  | 62.0  | 5.68  | 0.0051 |
| 0.8221 | I1MU56     | Uncharacterized protein                     | 24 | 11 | 82.2  | 6.25  | 0.0058 |
| 0.8172 | I1M860     | TOG domain-containing protein               | 16 | 4  | 37.8  | 5.31  | 0.0251 |
| 0.8151 | I1N610     | Uncharacterized protein                     | 16 | 4  | 35.5  | 6.05  | 0.0005 |
| 0.8144 | C6T199     | zf-Tim10_DDP domain-containing protein      | 39 | 2  | 9.7   | 6.01  | 0.0079 |
| 0.8136 | C6SZR4     | Uncharacterized protein                     | 35 | 6  | 28.2  | 6.42  | 0.0012 |
| 0.8128 | I1L7W8     | Phi class glutathione S-transferase         | 34 | 4  | 24.7  | 5.44  | 0.0160 |
| 0.8115 | K7LPS4     | NOT2_3_5 domain-containing protein          | 10 | 3  | 70.0  | 7.64  | 0.0447 |
| 0.8068 | I1MYV2     | SAP domain-containing protein               | 14 | 6  | 78.0  | 4.74  | 0.0015 |
| 0.8050 | I1MUN3     | Nop domain-containing protein               | 33 | 13 | 61.1  | 8.43  | 0.0040 |
| 0.8032 | K7MXK9     | Hydrolase_4 domain-containing protein       | 13 | 4  | 77.3  | 7.94  | 0.0309 |
| 0.8007 | C6T244     | Uncharacterized protein                     | 30 | 2  | 14.0  | 5.17  | 0.0223 |
| 0.7994 | K7K2H1     | Nsp1_C domain-containing protein            | 5  | 2  | 74.1  | 4.77  | 0.0034 |
| 0.7988 | C6T1X7     | Uncharacterized protein                     | 38 | 2  | 12.5  | 9.92  | 0.0123 |
| 0.7973 | I1K811     | Uncharacterized protein                     | 13 | 4  | 51.3  | 6.52  | 0.0014 |
| 0.7964 | I1MAX9     | SAICAR_synt domain-containing protein       | 17 | 4  | 46.0  | 6.28  | 0.0105 |
| 0.7945 | C6SW70     | Uncharacterized protein                     | 42 | 11 | 28.2  | 9.88  | 0.0225 |
| 0.7939 | K7K780     | Uncharacterized protein                     | 11 | 9  | 132.9 | 5.31  | 0.0133 |
| 0.7930 | I1M7N8     | Uncharacterized protein                     | 20 | 5  | 32.7  | 4.96  | 0.0031 |
| 0.7923 | I1M984     | AA_TRNA_LIGASE_II domain-containing protein | 45 | 19 | 60.2  | 6.10  | 0.0034 |
| 0.7920 | I1JS10     | Uncharacterized protein                     | 86 | 2  | 6.8   | 8.92  | 0.0002 |
| 0.7917 | C6T078     | Uncharacterized protein                     | 18 | 2  | 14.3  | 10.83 | 0.0059 |
| 0.7910 | I1JZT5     | Plasma membrane ATPase (EC 7.1.2.1)         | 36 | 25 | 105.0 | 6.73  | 0.0084 |
| 0.7887 | A0A0R4J337 | Expansin                                    | 21 | 4  | 27.6  | 8.27  | 0.0452 |
| 0.7876 | K7KWK9     | Uncharacterized protein                     | 7  | 9  | 212.6 | 5.80  | 0.0018 |
| 0.7838 | C6T588     | Bet_v_1 domain-containing protein           | 61 | 7  | 16.8  | 4.88  | 0.0306 |
| 0.7819 | I1JV20     | Uncharacterized protein                     | 6  | 2  | 52.6  | 6.10  | 0.0078 |
| 0.7774 | I1JVB1     | Uncharacterized protein                     | 38 | 2  | 10.3  | 10.05 | 0.0016 |
| 0.7722 | K7MBG3     | Sucrose synthase (EC 2.4.1.13)              | 27 | 17 | 91.5  | 6.24  | 0.0035 |
| 0.7696 | C6SXW1     | Peptide-methionine (R)-S-oxide reductase    | 41 | 3  | 15.1  | 6.74  | 0.0164 |

|        |            |                                                   |    |    |       |       |        |
|--------|------------|---------------------------------------------------|----|----|-------|-------|--------|
| 0.7689 | I1NG02     | Thioredoxin domain-containing protein             | 31 | 4  | 24.4  | 5.57  | 0.0190 |
| 0.7687 | C6TDW7     | Uncharacterized protein                           | 15 | 4  | 25.5  | 8.16  | 0.0001 |
| 0.7666 | C6T8S2     | Uncharacterized protein                           | 29 | 5  | 32.5  | 5.27  | 0.0014 |
| 0.7641 | I1JU82     | Uncharacterized protein                           | 13 | 9  | 109.2 | 7.44  | 0.0015 |
| 0.7621 | K7LK00     | Uncharacterized protein                           | 4  | 2  | 83.4  | 6.04  | 0.0126 |
| 0.7617 | K7KPN5     | PPR_long domain-containing protein                | 13 | 4  | 50.9  | 7.88  | 0.0014 |
| 0.7582 | I1JMK6     | Uncharacterized protein                           | 16 | 3  | 52.2  | 5.81  | 0.0032 |
| 0.7574 | C6T8Y6     | AB hydrolase-1 domain-containing protein          | 29 | 5  | 35.4  | 6.46  | 0.0077 |
| 0.7560 | C6T9B7     | Uncharacterized protein                           | 21 | 5  | 31.6  | 7.24  | 0.0029 |
| 0.7471 | A0A0R0I177 | Pyr_redox_2 domain-containing protein             | 55 | 16 | 46.8  | 5.91  | 0.0004 |
| 0.7471 | I1KYU6     | Alpha-1,4 glucan phosphorylase (EC 2.4.1.1)       | 33 | 17 | 95.8  | 6.43  | 0.0136 |
| 0.7467 | I1JDD2     | Uncharacterized protein                           | 29 | 7  | 48.8  | 7.21  | 0.0193 |
| 0.7439 | I1KD09     | ATP synthase subunit gamma                        | 41 | 11 | 35.4  | 9.06  | 0.0342 |
| 0.7421 | K7KUE2     | Uncharacterized protein                           | 20 | 7  | 83.7  | 4.98  | 0.0241 |
| 0.7417 | I1N628     | Uncharacterized protein                           | 53 | 9  | 29.7  | 9.07  | 0.0388 |
| 0.7409 | I1JQD8     | UBA domain-containing protein                     | 14 | 3  | 45.2  | 7.21  | 0.0016 |
| 0.7407 | C6SYQ5     | GLTP domain-containing protein                    | 32 | 5  | 22.7  | 7.42  | 0.0040 |
| 0.7394 | C6T1V2     | SHSP domain-containing protein                    | 46 | 4  | 17.7  | 6.81  | 0.0464 |
| 0.7371 | I1JDM8     | W2 domain-containing protein                      | 17 | 6  | 48.7  | 6.64  | 0.0128 |
| 0.7367 | K7L2B3     | Glyco_transf_20 domain-containing protein         | 19 | 10 | 96.9  | 5.82  | 0.0314 |
| 0.7364 | B3TDK6     | Lipoxygenase (EC 1.13.11.-)                       | 73 | 45 | 96.7  | 6.58  | 0.0066 |
| 0.7339 | C6TB70     | Thioredoxin domain-containing protein             | 56 | 7  | 24.4  | 6.92  | 0.0034 |
| 0.7336 | C6TCX5     | Peptidase_M24 domain-containing protein           | 35 | 10 | 43.5  | 6.70  | 0.0222 |
| 0.7332 | Q9SWB6     | Probable bifunctional TENA-E protein              | 38 | 10 | 26.0  | 5.35  | 0.0000 |
| 0.7332 | K7MT91     | Aldo_ket_red domain-containing protein            | 69 | 12 | 32.3  | 6.73  | 0.0236 |
| 0.7316 | C6T3P3     | Uncharacterized protein                           | 19 | 4  | 24.3  | 8.29  | 0.0330 |
| 0.7310 | A0A0R4J3P8 | Peptidase_M24 domain-containing protein           | 42 | 11 | 43.3  | 6.86  | 0.0005 |
| 0.7310 | C6TK48     | Uncharacterized protein                           | 7  | 2  | 44.9  | 5.57  | 0.0015 |
| 0.7298 | I1MTB5     | B5 domain-containing protein                      | 36 | 14 | 67.8  | 5.72  | 0.0296 |
| 0.7291 | I1LA46     | Uncharacterized protein                           | 25 | 5  | 30.6  | 6.68  | 0.0002 |
| 0.7243 | C6TJT0     | Uncharacterized protein                           | 51 | 11 | 39.9  | 8.87  | 0.0079 |
| 0.7237 | A0A0R0GXL3 | MLO-like protein                                  | 12 | 5  | 61.3  | 10.45 | 0.0027 |
| 0.7234 | A0A0R0KW93 | Uncharacterized protein                           | 5  | 2  | 65.0  | 5.05  | 0.0326 |
| 0.7191 | B6ZJZ9     | Peroxisomal adenine nucleotide carrier 1 (GmPNC1) | 15 | 3  | 34.7  | 9.69  | 0.0081 |
| 0.7162 | C6TMK3     | Cysteine proteinase inhibitor                     | 53 | 8  | 27.6  | 7.80  | 0.0373 |
| 0.7127 | K7KWZ7     | PPM-type phosphatase domain-containing protein    | 28 | 5  | 30.8  | 6.30  | 0.0005 |
| 0.7102 | K7M6T0     | Macro domain-containing protein                   | 28 | 3  | 25.3  | 8.16  | 0.0207 |
| 0.7093 | I1LMQ7     | Uncharacterized protein                           | 3  | 2  | 89.5  | 7.25  | 0.0035 |
| 0.7084 | I1LES5     | PB1 domain-containing protein                     | 25 | 8  | 76.5  | 6.18  | 0.0066 |
| 0.7077 | I1MTZ8     | Tr-type G domain-containing protein               | 19 | 12 | 110.0 | 5.17  | 0.0200 |
| 0.7069 | C6SVI1     | V-type proton ATPase subunit F                    | 55 | 5  | 14.5  | 6.57  | 0.0022 |
| 0.7065 | A0A0R0LA35 | Epimerase domain-containing protein               | 39 | 7  | 35.2  | 6.52  | 0.0066 |
| 0.7051 | K7LD23     | Uncharacterized protein                           | 15 | 7  | 66.2  | 7.53  | 0.0385 |
| 0.7040 | C6TFT8     | Annexin                                           | 42 | 11 | 35.6  | 6.46  | 0.0293 |
| 0.6991 | I1LCQ1     | Pyruvate kinase (EC 2.7.1.40)                     | 36 | 14 | 57.8  | 7.36  | 0.0003 |
| 0.6971 | A0A0R4J3X4 | SHSP domain-containing protein                    | 31 | 4  | 25.6  | 7.49  | 0.0491 |
| 0.6967 | I1JE17     | Glycosyltransferase                               | 50 | 13 | 53.1  | 5.86  | 0.0060 |
| 0.6960 | I1KJZ4     | Uncharacterized protein                           | 15 | 4  | 52.5  | 5.25  | 0.0092 |
| 0.6955 | I1J700     | Aldo_ket_red domain-containing protein            | 28 | 8  | 35.0  | 6.73  | 0.0236 |
| 0.6950 | I1N5M3     | Elongation factor Ts, mitochondrial               | 7  | 2  | 38.3  | 8.24  | 0.0010 |
| 0.6908 | C6T770     | RING-type domain-containing protein               | 21 | 4  | 37.2  | 8.12  | 0.0021 |
| 0.6871 | C6TER4     | NmrA domain-containing protein                    | 33 | 8  | 34.9  | 6.81  | 0.0309 |
| 0.6867 | I1L7B5     | Uncharacterized protein                           | 15 | 7  | 67.9  | 8.44  | 0.0200 |
| 0.6847 | C6TNZ4     | Ferredoxin                                        | 49 | 3  | 16.3  | 5.10  | 0.0466 |
| 0.6841 | C6SZZ1     | Translocon-associated protein subunit beta        | 26 | 3  | 20.9  | 9.36  | 0.0018 |
| 0.6839 | A0A368UHY2 | Uncharacterized protein                           | 10 | 33 | 559.5 | 6.16  | 0.0024 |
| 0.6823 | I1LAX4     | Uncharacterized protein                           | 35 | 14 | 82.9  | 7.43  | 0.0125 |

|        |            |                                                                                             |    |    |       |       |        |
|--------|------------|---------------------------------------------------------------------------------------------|----|----|-------|-------|--------|
| 0.6798 | I1J7G5     | Uncharacterized protein                                                                     | 47 | 5  | 18.6  | 5.02  | 0.0002 |
| 0.6771 | C6T2R8     | Uncharacterized protein                                                                     | 25 | 5  | 25.0  | 5.57  | 0.0047 |
| 0.6766 | I1MHF8     | Uncharacterized protein                                                                     | 15 | 8  | 99.4  | 5.29  | 0.0219 |
| 0.6762 | I1KBB6     | 4-alpha-glucanotransferase                                                                  | 32 | 10 | 63.9  | 5.96  | 0.0142 |
| 0.6761 | I1M596     | Lipoxygenase (EC 1.13.11.-)                                                                 | 69 | 39 | 97.2  | 6.67  | 0.0144 |
| 0.6739 | Q9LLQ6     | Seed maturation protein PM34                                                                | 71 | 17 | 31.7  | 7.08  | 0.0002 |
| 0.6696 | I1N0Q9     | Uncharacterized protein                                                                     | 7  | 3  | 85.8  | 5.83  | 0.0189 |
| 0.6674 | I1MKT8     | Glycosyltransferase                                                                         | 29 | 8  | 54.4  | 6.84  | 0.0087 |
| 0.6656 | K7MGK0     | AP-4 complex subunit epsilon                                                                | 22 | 14 | 107.7 | 6.11  | 0.0006 |
| 0.6646 | I1KTV3     | Ribosomal_L18e/L15P domain-containing protein                                               | 12 | 3  | 31.0  | 11.09 | 0.0263 |
| 0.6637 | I1L1F3     | Uncharacterized protein                                                                     | 38 | 7  | 28.3  | 9.83  | 0.0321 |
| 0.6636 | I1LP68     | Bet_v_1 domain-containing protein                                                           | 40 | 4  | 17.7  | 4.81  | 0.0008 |
| 0.6626 | C6T374     | VOC domain-containing protein                                                               | 61 | 4  | 15.4  | 5.69  | 0.0006 |
| 0.6607 | I1NAA0     | Uncharacterized protein                                                                     | 26 | 5  | 33.8  | 7.46  | 0.0038 |
| 0.6589 | I1KBB9     | OBG-type G domain-containing protein                                                        | 21 | 5  | 42.6  | 8.65  | 0.0175 |
| 0.6581 | K7MJA4     | Uncharacterized protein                                                                     | 1  | 2  | 186.8 | 7.14  | 0.0304 |
| 0.6580 | I1KYG2     | C2 domain-containing protein                                                                | 26 | 8  | 46.6  | 4.70  | 0.0081 |
| 0.6577 | I1LNT7     | Uncharacterized protein                                                                     | 6  | 4  | 83.7  | 6.01  | 0.0136 |
| 0.6574 | I1MU70     | Uncharacterized protein                                                                     | 17 | 7  | 80.0  | 6.09  | 0.0193 |
| 0.6568 | C6TD56     | Glyceraldehyde-3-phosphate dehydrogenase                                                    | 69 | 17 | 37.0  | 7.47  | 0.0232 |
| 0.6541 | K7MH27     | Uncharacterized protein                                                                     | 37 | 6  | 26.5  | 9.20  | 0.0386 |
| 0.6519 | I1NI24     | ETF domain-containing protein                                                               | 38 | 5  | 27.7  | 7.83  | 0.0297 |
| 0.6517 | C6SXN1     | Uncharacterized protein                                                                     | 15 | 2  | 19.1  | 8.15  | 0.0290 |
| 0.6507 | I1MW74     | PCI domain-containing protein                                                               | 27 | 8  | 47.0  | 6.04  | 0.0444 |
| 0.6494 | I1KLK0     | Lipoxygenase (EC 1.13.11.-)                                                                 | 4  | 2  | 103.0 | 7.31  | 0.0041 |
| 0.6477 | C6T0R5     | Ribosomal_L18e/L15P domain-containing protein                                               | 20 | 3  | 21.0  | 11.18 | 0.0038 |
| 0.6413 | A0A0R0F1L5 | Uncharacterized protein                                                                     | 25 | 5  | 28.3  | 7.05  | 0.0282 |
| 0.6408 | I1L0E5     | Ubiquitin-like domain-containing protein                                                    | 44 | 7  | 17.7  | 9.74  | 0.0039 |
| 0.6366 | C6SY72     | SWIB domain-containing protein                                                              | 17 | 2  | 14.4  | 10.23 | 0.0131 |
| 0.6354 | A0A0R4J3C5 | Uncharacterized protein                                                                     | 21 | 7  | 51.4  | 7.64  | 0.0175 |
| 0.6315 | I1MH79     | Translation machinery-associated protein 22                                                 | 40 | 5  | 21.0  | 6.73  | 0.0088 |
| 0.6297 | I1K7Z3     | Uncharacterized protein                                                                     | 12 | 2  | 29.0  | 9.04  | 0.0406 |
| 0.6297 | I1K4M7     | Uncharacterized protein                                                                     | 38 | 17 | 70.8  | 5.21  | 0.0038 |
| 0.6263 | I1LEY1     | Uncharacterized protein                                                                     | 54 | 18 | 65.4  | 5.03  | 0.0373 |
| 0.6243 | I1MRJ8     | Uncharacterized protein                                                                     | 14 | 8  | 78.9  | 8.68  | 0.0126 |
| 0.6228 | C6TBR0     | Uncharacterized protein                                                                     | 11 | 2  | 29.4  | 6.52  | 0.0046 |
| 0.6218 | K7KS35     | Theta class glutathione S-transferase                                                       | 19 | 3  | 28.4  | 9.64  | 0.0228 |
| 0.6213 | I1N6Y7     | Uncharacterized protein                                                                     | 10 | 5  | 85.9  | 7.14  | 0.0119 |
| 0.6175 | I1MT10     | Uncharacterized protein                                                                     | 54 | 26 | 70.8  | 5.39  | 0.0002 |
| 0.6141 | A0A0R0IQ81 | Glutaredoxin                                                                                | 35 | 4  | 17.9  | 7.37  | 0.0072 |
| 0.6137 | I1J495     | Uncharacterized protein                                                                     | 10 | 5  | 87.5  | 6.90  | 0.0156 |
| 0.6114 | I1JB78     | Uncharacterized protein                                                                     | 13 | 3  | 48.9  | 5.82  | 0.0005 |
| 0.6092 | I1JRM7     | Uncharacterized protein                                                                     | 53 | 10 | 35.7  | 4.73  | 0.0446 |
| 0.6089 | I1J575     | Uncharacterized protein                                                                     | 31 | 5  | 28.8  | 8.51  | 0.0060 |
| 0.6084 | C6SYZ8     | Uncharacterized protein                                                                     | 23 | 5  | 23.6  | 10.32 | 0.0065 |
| 0.6062 | B0M195     | Peroxisomal short-chain dehydrogenase/reductase                                             | 29 | 4  | 26.3  | 8.69  | 0.0147 |
| 0.6059 | A0A0R0J965 | Uncharacterized protein                                                                     | 50 | 11 | 34.4  | 6.90  | 0.0066 |
| 0.6059 | I1N4A7     | Uncharacterized protein                                                                     | 54 | 9  | 29.8  | 8.65  | 0.0260 |
| 0.6043 | C6T3E5     | MPN domain-containing protein                                                               | 39 | 4  | 22.9  | 5.78  | 0.0053 |
| 0.6035 | I1KB73     | tRNA-binding domain-containing protein                                                      | 35 | 8  | 42.3  | 6.29  | 0.0002 |
| 0.6033 | I1MRK4     | Dihydrolipoamide acetyltransferase component of pyruvate dehydrogenase complex (EC 2.3.1.-) | 28 | 9  | 56.2  | 7.02  | 0.0083 |
| 0.6029 | I1LZK9     | Uncharacterized protein                                                                     | 17 | 5  | 65.4  | 6.87  | 0.0225 |
| 0.6015 | I1KNN0     | ATP-dependent 6-phosphofructokinase                                                         | 41 | 11 | 51.1  | 6.71  | 0.0014 |
| 0.6009 | I1MZJ8     | Uncharacterized protein                                                                     | 15 | 4  | 41.1  | 5.62  | 0.0065 |
| 0.6007 | C6T763     | PCI domain-containing protein                                                               | 58 | 11 | 30.8  | 5.15  | 0.0013 |

|         |            |                                                    |    |    |       |      |        |
|---------|------------|----------------------------------------------------|----|----|-------|------|--------|
| 0.5997  | I1KI20     | SufE domain-containing protein                     | 14 | 3  | 42.7  | 5.78 | 0.0038 |
| 0.5965  | I1N1M0     | ATP-dependent 6-phosphofructokinase                | 13 | 4  | 58.4  | 7.59 | 0.0466 |
| 0.5962  | I1N4I4     | Uncharacterized protein                            | 6  | 2  | 50.2  | 8.09 | 0.0421 |
| 0.5941  | A0A0R0EHQ5 | Uncharacterized protein                            | 1  | 2  | 239.4 | 6.83 | 0.0409 |
| 0.5934  | A0A0R0JJK8 | Uncharacterized protein                            | 15 | 7  | 69.4  | 7.27 | 0.0033 |
|         |            | Dolichyl-diphosphooligosaccharide--protein         |    |    |       |      |        |
| 0.5928  | A0A368UIG3 | glycosyltransferase subunit 1                      | 27 | 9  | 52.3  | 7.80 | 0.0078 |
| 0.5923  | I1NBE6     | Uncharacterized protein                            | 23 | 12 | 82.1  | 7.37 | 0.0003 |
| 0.5907  | A0A0R0JW56 | Pyruvate kinase (EC 2.7.1.40)                      | 55 | 20 | 55.3  | 7.56 | 0.0003 |
| 0.5903  | I1KAV2     | Uncharacterized protein                            | 10 | 3  | 38.8  | 4.64 | 0.0190 |
| 0.5899  | C6TJP9     | WD_REPEATS_REGION domain-containing protein        | 8  | 2  | 38.2  | 7.06 | 0.0215 |
| 0.5893  | I1NIN5     | Uncharacterized protein                            | 9  | 6  | 108.4 | 5.39 | 0.0187 |
| 0.5871  | K7KP23     | Uncharacterized protein                            | 5  | 2  | 60.5  | 9.00 | 0.0247 |
| -0.5853 | I1JU62     | Transmembrane 9 superfamily member                 | 20 | 9  | 73.1  | 7.62 | 0.0072 |
| -0.5853 | A0A0R0J895 | Terpene cyclase/mutase family member (EC 5.4.99.-) | 4  | 2  | 87.5  | 6.76 | 0.0469 |
| -0.5856 | I1KQ30     | Aldedh domain-containing protein                   | 52 | 19 | 54.8  | 6.04 | 0.0082 |
| -0.5857 | C6TDP2     | Uncharacterized protein                            | 30 | 8  | 30.1  | 7.93 | 0.0024 |
| -0.5862 | I1MR46     | Uncharacterized protein                            | 23 | 8  | 62.0  | 9.41 | 0.0188 |
| -0.5882 | I1LBH6     | Uncharacterized protein                            | 58 | 18 | 50.5  | 5.00 | 0.0060 |
| -0.5884 | A0A0R4J301 | Endoglucanase (EC 3.2.1.4)                         | 9  | 4  | 57.7  | 6.09 | 0.0046 |
| -0.5893 | I1MVC1     | Uncharacterized protein                            | 41 | 15 | 69.4  | 8.35 | 0.0121 |
| -0.5904 | I1JRY5     | Uncharacterized protein                            | 20 | 5  | 37.4  | 9.55 | 0.0134 |
| -0.5909 | I1N1U5     | Glycosyltransferase (EC 2.4.1.-)                   | 29 | 9  | 53.3  | 5.60 | 0.0120 |
| -0.5952 | I1K1I6     | Isocitrate dehydrogenase [NADP] (EC 1.1.1.42)      | 30 | 13 | 53.3  | 8.12 | 0.0132 |
| -0.5952 | I1LCX7     | RING-type E3 ubiquitin transferase (EC 2.3.2.27)   | 4  | 2  | 68.7  | 6.05 | 0.0018 |
| -0.5969 | I1MJH5     | Uncharacterized protein                            | 30 | 8  | 46.7  | 5.59 | 0.0109 |
| -0.5980 | I1M6K2     | C2 domain-containing protein                       | 15 | 4  | 46.1  | 4.68 | 0.0102 |
| -0.5989 | I1M989     | Transmembrane 9 superfamily member                 | 19 | 10 | 73.1  | 7.96 | 0.0090 |
| -0.5989 | I1MG77     | Uncharacterized protein                            | 27 | 9  | 60.1  | 7.36 | 0.0138 |
| -0.5995 | C6TH16     | Reticulon-like protein                             | 15 | 2  | 28.6  | 7.65 | 0.0216 |
| -0.6019 | I1KPM9     | TPR_REGION domain-containing protein               | 17 | 8  | 63.2  | 5.41 | 0.0168 |
| -0.6032 | I1L5G4     | Amidophosphoribosyltransferase                     | 27 | 11 | 62.0  | 6.84 | 0.0011 |
| -0.6043 | I1LY51     | Oxidored_FMN domain-containing protein             | 72 | 16 | 44.1  | 8.15 | 0.0143 |
| -0.6065 | A0A0R4J2N9 | Fe2OG dioxygenase domain-containing protein        | 31 | 6  | 40.6  | 5.82 | 0.0017 |
| -0.6068 | K7KSH9     | MFS domain-containing protein                      | 12 | 5  | 78.8  | 5.71 | 0.0105 |
| -0.6075 | A0A0R0FJ15 | Uncharacterized protein                            | 27 | 20 | 152.8 | 6.54 | 0.0087 |
| -0.6081 | I1LJ14     | Uncharacterized protein                            | 57 | 17 | 53.5  | 6.87 | 0.0157 |
| -0.6092 | A6BM07     | Isoflavone 7-O-glucosyltransferase 1               | 11 | 3  | 52.0  | 5.34 | 0.0480 |
| -0.6096 | I1LIV5     | FAD-binding PCMH-type domain-containing protein    | 47 | 19 | 66.0  | 8.21 | 0.0015 |
| -0.6113 | I1LYG4     | t-SNARE coiled-coil homology protein               | 19 | 4  | 30.3  | 6.58 | 0.0022 |
| -0.6141 | I1MR41     | Aminomethyltransferase                             | 40 | 10 | 44.3  | 8.15 | 0.0035 |
| -0.6159 | A0A0R4J5C5 | Uncharacterized protein                            | 63 | 8  | 27.6  | 7.30 | 0.0235 |
| -0.6163 | Q9FQE7     | Glutathione S-transferase                          | 49 | 7  | 25.5  | 6.24 | 0.0358 |
| -0.6164 | I1LXH8     | Uncharacterized protein                            | 18 | 5  | 50.8  | 6.73 | 0.0022 |
| -0.6182 | A0A0R0FLF0 | Xyloglucan endotransglucosylase/hydrolase          | 25 | 8  | 40.4  | 9.25 | 0.0078 |
| -0.6193 | A0A0R0HFK7 | Exostosin domain-containing protein                | 5  | 2  | 59.4  | 8.84 | 0.0336 |
| -0.6200 | I1M8Q5     | Uncharacterized protein                            | 28 | 10 | 54.4  | 6.02 | 0.0080 |
| -0.6239 | A0A0R4J3B7 | Lipase_GDSL domain-containing protein              | 23 | 4  | 39.7  | 4.84 | 0.0329 |
| -0.6258 | I1M017     | PPIase cyclophilin-type domain-containing protein  | 19 | 4  | 48.7  | 5.20 | 0.0034 |
| -0.6262 | I1JN48     | DNA gyrase subunit B (EC 5.6.2.3)                  | 7  | 3  | 81.1  | 8.38 | 0.0178 |
| -0.6264 | I1MEW6     | SOR_SNZ domain-containing protein                  | 20 | 6  | 33.2  | 6.11 | 0.0091 |
| -0.6266 | K7MLF2     | AAA domain-containing protein                      | 12 | 8  | 132.6 | 6.61 | 0.0117 |
| -0.6295 | I1MD33     | LsmAD domain-containing protein                    | 3  | 2  | 69.3  | 5.71 | 0.0231 |
| -0.6317 | I1LU49     | PKS_ER domain-containing protein                   | 41 | 8  | 38.2  | 6.00 | 0.0136 |
| -0.6334 | I1KPI6     | NAB domain-containing protein                      | 2  | 2  | 162.5 | 5.01 | 0.0427 |
| -0.6359 | Q6YGT9     | Purple acid phosphatase (EC 3.1.3.2)               | 53 | 15 | 59.5  | 8.10 | 0.0004 |
| -0.6359 | I1M658     | Transmembrane 9 superfamily member                 | 15 | 7  | 75.1  | 6.96 | 0.0022 |

|         |            |                                                                                |    |    |       |      |        |
|---------|------------|--------------------------------------------------------------------------------|----|----|-------|------|--------|
| -0.6389 | A0A0R0IG82 | Aldedh domain-containing protein                                               | 18 | 6  | 56.5  | 6.42 | 0.0081 |
| -0.6424 | A0A0R0GAK0 | Uncharacterized protein                                                        | 48 | 10 | 30.6  | 8.40 | 0.0161 |
| -0.6428 | I1JM18     | Transket_pyr domain-containing protein                                         | 41 | 7  | 39.0  | 6.54 | 0.0118 |
| -0.6438 | I1KP02     | Uncharacterized protein                                                        | 27 | 11 | 65.3  | 5.05 | 0.0083 |
| -0.6468 | C6THB9     | Uncharacterized protein                                                        | 43 | 12 | 45.6  | 6.35 | 0.0076 |
| -0.6472 | I1L327     | DUF862 domain-containing protein                                               | 19 | 3  | 27.2  | 7.34 | 0.0161 |
| -0.6505 | C6TK68     | TPT domain-containing protein                                                  | 11 | 3  | 36.2  | 9.29 | 0.0055 |
| -0.6533 | I1N4U1     | 6-phosphogluconate dehydrogenase, decarboxylating                              | 59 | 20 | 53.6  | 5.90 | 0.0035 |
| -0.6546 | F6KBT5     | Allene oxide cyclase 5 (EC 5.3.99.6)                                           | 23 | 5  | 28.4  | 8.63 | 0.0460 |
| -0.6569 | Q8S5C1     | 4-coumarate:CoA ligase isoenzyme 2 (EC 6.2.1.12)                               | 27 | 11 | 60.1  | 6.74 | 0.0166 |
| -0.6576 | I1JIC8     | PRA1 family protein                                                            | 26 | 3  | 23.1  | 9.82 | 0.0112 |
| -0.6585 | I1MDX7     | Uncharacterized protein                                                        | 14 | 3  | 31.9  | 8.15 | 0.0331 |
| -0.6608 | C6TK33     | Uncharacterized protein                                                        | 41 | 10 | 32.5  | 6.70 | 0.0103 |
| -0.6681 | K7MNJ0     | GH10 domain-containing protein                                                 | 11 | 8  | 103.3 | 6.92 | 0.0441 |
| -0.6697 | A0A0R0LJH9 | Protein transport protein sec16                                                | 4  | 4  | 152.0 | 5.12 | 0.0252 |
| -0.6712 | A0A0R0JMI0 | Glutamine amidotransferase type-2                                              | 16 | 20 | 239.4 | 6.57 | 0.0081 |
| -0.6718 | I1JUM2     | Plasma membrane ATPase (EC 7.1.2.1)                                            | 28 | 19 | 104.4 | 6.93 | 0.0383 |
| -0.6725 | K7LZA7     | SHSP domain-containing protein                                                 | 11 | 2  | 48.1  | 5.36 | 0.0262 |
| -0.6726 | C6T218     | Cytochrome b5 heme-binding protein                                             | 36 | 2  | 13.6  | 5.11 | 0.0094 |
| -0.6803 | C6SVR0     | Plastocyanin                                                                   | 39 | 3  | 16.8  | 5.20 | 0.0231 |
| -0.6813 | I1LJG0     | Glycosyltransferase (EC 2.4.2.-)                                               | 22 | 6  | 49.4  | 8.78 | 0.0079 |
| -0.6817 | I1MC85     | Uncharacterized protein                                                        | 32 | 10 | 45.8  | 5.82 | 0.0202 |
| -0.6826 | A0A0R0HNL5 | NAB domain-containing protein                                                  | 2  | 4  | 251.2 | 4.97 | 0.0007 |
| -0.6843 | I1KM16     | Uncharacterized protein                                                        | 64 | 13 | 28.1  | 5.68 | 0.0002 |
| -0.6845 | A0A0R0GYG6 | Abhydrolase_3 domain-containing protein                                        | 35 | 7  | 30.5  | 5.29 | 0.0052 |
| -0.6873 | A0A0R0H975 | Apocytochr_F_N domain-containing protein                                       | 34 | 7  | 35.3  | 8.82 | 0.0163 |
| -0.6903 | K7MU41     | Uncharacterized protein                                                        | 26 | 10 | 66.9  | 8.53 | 0.0004 |
| -0.6913 | I1MM41     | Uncharacterized protein                                                        | 9  | 3  | 58.3  | 6.00 | 0.0194 |
| -0.6924 | I1KUF1     | Fn3_like domain-containing protein                                             | 15 | 7  | 83.8  | 6.02 | 0.0026 |
| -0.6931 | C6TCI6     | Glutamate decarboxylase (EC 4.1.1.15)                                          | 45 | 15 | 56.2  | 5.81 | 0.0048 |
| -0.6931 | A0A368UJK6 | Uncharacterized protein                                                        | 12 | 7  | 125.3 | 5.26 | 0.0005 |
| -0.6938 | I1MR83     | DUF3700 domain-containing protein                                              | 32 | 5  | 25.5  | 5.60 | 0.0219 |
| -0.6952 | I1K478     | YTH domain-containing protein                                                  | 13 | 7  | 77.1  | 6.62 | 0.0036 |
| -0.6956 | I1J8X9     | Flavodoxin-like domain-containing protein                                      | 25 | 4  | 28.0  | 7.20 | 0.0102 |
| -0.6989 | C6T2H1     | Flavodoxin-like domain-containing protein                                      | 57 | 8  | 21.7  | 6.95 | 0.0470 |
| -0.7041 | I1L2I7     | Serine/threonine-protein phosphatase (EC 3.1.3.16)                             | 33 | 7  | 35.8  | 5.41 | 0.0273 |
| -0.7059 | I1LUM7     | ALOG domain-containing protein                                                 | 37 | 4  | 19.6  | 9.09 | 0.0016 |
| -0.7087 | I1K2B5     | Uncharacterized protein                                                        | 20 | 9  | 79.6  | 6.60 | 0.0011 |
| -0.7130 | I1K642     | Uncharacterized protein                                                        | 13 | 5  | 53.6  | 6.68 | 0.0150 |
| -0.7138 | I1LU10     | Uncharacterized protein                                                        | 46 | 13 | 46.3  | 6.30 | 0.0020 |
| -0.7147 | I1LN30     | Adenosylhomocysteinase (EC 3.3.1.1)                                            | 61 | 20 | 53.3  | 6.23 | 0.0035 |
| -0.7159 | I1N8A2     | Uncharacterized protein                                                        | 11 | 5  | 69.7  | 6.90 | 0.0005 |
| -0.7252 | I1KHB7     | Germin-like protein                                                            | 46 | 3  | 23.8  | 8.46 | 0.0003 |
| -0.7281 | A0A0R0JQA9 | X8 domain-containing protein                                                   | 19 | 2  | 21.5  | 7.24 | 0.0031 |
| -0.7290 | I1LJH2     | Uncharacterized protein                                                        | 32 | 9  | 52.0  | 5.36 | 0.0025 |
| -0.7320 | I1L1Q3     | Uncharacterized protein                                                        | 12 | 2  | 45.1  | 7.20 | 0.0178 |
| -0.7322 | A0A0R0EQE5 | Uncharacterized protein                                                        | 33 | 16 | 70.3  | 6.04 | 0.0190 |
| -0.7352 | I1K512     | RING-type domain-containing protein                                            | 10 | 2  | 47.3  | 6.09 | 0.0048 |
| -0.7373 | I1KRD0     | Uncharacterized protein                                                        | 12 | 2  | 47.8  | 6.30 | 0.0248 |
| -0.7421 | A0A0R0JPL6 | Peptidase A1 domain-containing protein                                         | 44 | 10 | 50.0  | 8.24 | 0.0171 |
| -0.7426 | I1KIA1     | Post-GPI attachment to proteins factor 3                                       | 5  | 2  | 39.9  | 7.27 | 0.0470 |
| -0.7452 | E2FKH8     | Sieve element occlusion by forisomes 1                                         | 7  | 3  | 75.2  | 6.64 | 0.0315 |
| -0.7472 | B1NC19     | Putative cysteine protease                                                     | 14 | 3  | 39.0  | 7.30 | 0.0019 |
| -0.7480 | I1MQP2     | Cellulase domain-containing protein                                            | 7  | 3  | 56.2  | 5.62 | 0.0158 |
| -0.7485 | I1KIJ3     | Uncharacterized protein                                                        | 3  | 2  | 117.3 | 7.12 | 0.0397 |
| -0.7488 | I1NHB5     | Dihydrolipoamide acetyltransferase component of pyruvate dehydrogenase complex | 32 | 9  | 48.4  | 8.63 | 0.0487 |

|         |            |                                             |    |    |       |      |        |
|---------|------------|---------------------------------------------|----|----|-------|------|--------|
| -0.7490 | I1L2C2     | Transmembrane 9 superfamily member          | 21 | 10 | 74.9  | 6.18 | 0.0048 |
| -0.7506 | A0A0R4J5R0 | Fe2OG dioxygenase domain-containing protein | 19 | 4  | 37.0  | 5.88 | 0.0172 |
| -0.7560 | G0T437     | Purple acid phosphatase (EC 3.1.3.2)        | 17 | 7  | 74.1  | 6.35 | 0.0055 |
| -0.7574 | I1J940     | RPW8 domain-containing protein              | 6  | 3  | 94.5  | 6.51 | 0.0027 |
| -0.7584 | I1J4T0     | t-SNARE coiled-coil homology protein        | 12 | 2  | 30.1  | 6.10 | 0.0026 |
| -0.7584 | I1MGZ2     | Plasma membrane ATPase (EC 7.1.2.1)         | 40 | 29 | 105.0 | 6.81 | 0.0052 |
| -0.7593 | I1JE07     | Uncharacterized protein                     | 45 | 12 | 36.9  | 7.05 | 0.0195 |
| -0.7594 | C6TMK6     | AAI domain-containing protein               | 40 | 3  | 13.3  | 8.05 | 0.0380 |
| -0.7598 | I1NBJ8     | Pectin acetylesterase (EC 3.1.1.-)          | 35 | 6  | 45.2  | 7.20 | 0.0097 |
| -0.7643 | C6T225     | Uncharacterized protein (Fragment)          | 24 | 4  | 22.2  | 5.00 | 0.0003 |
| -0.7643 | I1KSB7     | X8 domain-containing protein                | 13 | 4  | 53.0  | 5.16 | 0.0326 |
| -0.7672 | C6T2V7     | Phytocyanin domain-containing protein       | 18 | 2  | 26.1  | 4.87 | 0.0168 |
| -0.7698 | I1KYC6     | Peptidase A1 domain-containing protein      | 14 | 4  | 51.9  | 7.84 | 0.0066 |
| -0.7700 | A0A0R4J5M9 | Uncharacterized protein                     | 13 | 3  | 38.8  | 7.59 | 0.0003 |
| -0.7705 | I1M1I9     | Uncharacterized protein                     | 5  | 3  | 82.0  | 9.28 | 0.0190 |
| -0.7708 | I1KBK8     | Uncharacterized protein                     | 23 | 13 | 91.0  | 5.25 | 0.0008 |
| -0.7753 | I1MT77     | Uncharacterized protein                     | 29 | 8  | 50.1  | 5.67 | 0.0227 |
| -0.7762 | I1K775     | X8 domain-containing protein                | 12 | 3  | 48.3  | 5.00 | 0.0010 |
| -0.7770 | I1KRP1     | Transmembrane 9 superfamily member          | 20 | 11 | 69.2  | 7.47 | 0.0002 |
| -0.7792 | C5HU39     | AIR12                                       | 20 | 3  | 25.6  | 7.50 | 0.0176 |
| -0.7796 | I1JVD1     | Uncharacterized protein                     | 6  | 3  | 78.7  | 6.73 | 0.0325 |
| -0.7803 | I1MZ96     | Uncharacterized protein                     | 9  | 4  | 75.4  | 5.72 | 0.0003 |
| -0.7811 | I1LTS0     | Arogenate dehydratase (EC 4.2.1.91)         | 17 | 5  | 46.2  | 7.84 | 0.0272 |
| -0.7874 | I1JL58     | PRA1 family protein                         | 11 | 2  | 24.2  | 8.19 | 0.0001 |
| -0.7874 | C6SYW1     | Bet_v_1 domain-containing protein           | 44 | 6  | 17.0  | 5.12 | 0.0049 |
| -0.7877 | I1L7Z5     | Peroxidase (EC 1.11.1.7)                    | 18 | 4  | 35.1  | 6.30 | 0.0256 |
| -0.7895 | I1J5A5     | Aldedh domain-containing protein            | 50 | 16 | 58.4  | 6.84 | 0.0006 |
| -0.7909 | I1K7Q8     | NmrA domain-containing protein              | 60 | 12 | 34.2  | 6.06 | 0.0189 |
| -0.7930 | P13708     | Sucrose synthase                            | 75 | 46 | 92.2  | 6.48 | 0.0160 |
| -0.7935 | K7L6B6     | NAD(P)-bd_dom domain-containing protein     | 9  | 3  | 45.7  | 8.98 | 0.0071 |
| -0.7942 | C6TH50     | Xyloglucan endotransglucosylase/hydrolase   | 22 | 5  | 35.0  | 5.01 | 0.0004 |
| -0.7957 | I1LWZ5     | PMR5N domain-containing protein             | 7  | 2  | 50.4  | 6.84 | 0.0387 |
| -0.8009 | C6TA28     | Nucleoside diphosphate kinase (EC 2.7.4.6)  | 15 | 2  | 25.2  | 9.03 | 0.0002 |
| -0.8039 | C6SX29     | ACT domain-containing protein               | 22 | 2  | 16.6  | 4.70 | 0.0107 |
| -0.8054 | Q6RUF9     | Proline dehydrogenase (EC 1.5.5.2)          | 9  | 3  | 54.4  | 8.13 | 0.0014 |
| -0.8117 | I1JA3      | Uncharacterized protein                     | 8  | 3  | 59.5  | 6.80 | 0.0058 |
| -0.8130 | I1LZN1     | Transmembrane 9 superfamily member          | 17 | 8  | 77.5  | 6.96 | 0.0197 |
| -0.8163 | I1MV80     | Cupin_2 domain-containing protein           | 51 | 7  | 33.0  | 6.61 | 0.0218 |
| -0.8211 | I1NAB2     | Uncharacterized protein                     | 9  | 8  | 146.2 | 7.62 | 0.0359 |
| -0.8217 | A0A0R0JYE8 | Uncharacterized protein                     | 3  | 2  | 101.0 | 8.53 | 0.0058 |
| -0.8224 | I1JIW1     | Amidohydro-rel domain-containing protein    | 19 | 5  | 57.8  | 6.54 | 0.0007 |
| -0.8243 | A0A0R0KVX2 | Fe2OG dioxygenase domain-containing protein | 15 | 3  | 39.7  | 6.84 | 0.0495 |
| -0.8281 | C6THF2     | Uncharacterized protein                     | 14 | 2  | 31.5  | 5.36 | 0.0015 |
| -0.8284 | A0A0R0GFB2 | Uncharacterized protein                     | 54 | 18 | 57.5  | 8.87 | 0.0349 |
| -0.8332 | A0A0R4J4S6 | NADPH-protochlorophyllide oxidoreductase    | 52 | 13 | 43.2  | 8.78 | 0.0091 |
| -0.8379 | I1K7G0     | Methyltransferase (EC 2.1.1.-)              | 34 | 10 | 40.4  | 6.74 | 0.0061 |
| -0.8399 | C6TJF9     | Uncharacterized protein                     | 55 | 8  | 24.0  | 6.58 | 0.0141 |
| -0.8401 | I1JHV7     | Uncharacterized protein                     | 10 | 2  | 29.7  | 7.64 | 0.0025 |
| -0.8448 | C6T1F3     | Uncharacterized protein                     | 26 | 2  | 12.1  | 9.61 | 0.0154 |
| -0.8471 | I1KUQ6     | Lipoxygenase (EC 1.13.11.-)                 | 26 | 15 | 97.1  | 7.40 | 0.0152 |
| -0.8524 | K7M429     | Uncharacterized protein                     | 30 | 10 | 45.6  | 6.28 | 0.0001 |
| -0.8547 | I1J4P0     | TFIIS N-terminal domain-containing protein  | 5  | 2  | 57.6  | 5.38 | 0.0387 |
| -0.8552 | A0A0R4J508 | Expansin                                    | 11 | 2  | 27.9  | 9.26 | 0.0274 |
| -0.8562 | I1KW78     | Uncharacterized protein                     | 23 | 8  | 60.8  | 9.16 | 0.0349 |
| -0.8563 | I1LXW3     | Transmembrane 9 superfamily member          | 16 | 7  | 74.7  | 5.78 | 0.0070 |
| -0.8572 | C6SVL3     | Phytocyanin domain-containing protein       | 16 | 2  | 19.3  | 6.93 | 0.0170 |
| -0.8575 | I1L295     | Uncharacterized protein                     | 4  | 2  | 60.1  | 6.64 | 0.0026 |

|         |            |                                                 |    |    |       |      |        |
|---------|------------|-------------------------------------------------|----|----|-------|------|--------|
| -0.8578 | A0A368UGT8 | Uncharacterized protein                         | 46 | 12 | 50.4  | 5.14 | 0.0074 |
| -0.8626 | I1MXA0     | Uncharacterized protein                         | 4  | 2  | 63.2  | 5.36 | 0.0006 |
| -0.8671 | C6SVC7     | Uncharacterized protein                         | 32 | 3  | 20.2  | 7.87 | 0.0023 |
| -0.8672 | I1L3Z7     | Transmembrane 9 superfamily member              | 19 | 7  | 48.0  | 7.46 | 0.0002 |
| -0.8716 | A0A0R0GIU4 | Peroxidase (EC 1.11.1.7)                        | 24 | 5  | 35.2  | 7.83 | 0.0215 |
| -0.8762 | I1L340     | C2 domain-containing protein                    | 15 | 3  | 30.3  | 5.03 | 0.0242 |
| -0.8773 | I1KFE9     | Uncharacterized protein                         | 30 | 9  | 60.1  | 7.77 | 0.0026 |
| -0.8799 | A0A0R0LAT1 | Protein kinase domain-containing protein        | 10 | 5  | 66.4  | 7.50 | 0.0348 |
| -0.8800 | K7K770     | PWWP domain-containing protein                  | 3  | 2  | 111.3 | 4.94 | 0.0449 |
| -0.8838 | K7L3Q8     | Uncharacterized protein                         | 12 | 5  | 53.5  | 6.20 | 0.0001 |
| -0.8866 | I1LBI3     | Cysteine synthase (EC 2.5.1.47)                 | 16 | 3  | 34.5  | 5.45 | 0.0479 |
| -0.8872 | I1KUJ7     | Uncharacterized protein                         | 6  | 2  | 58.4  | 6.46 | 0.0114 |
| -0.8883 | I1NBM7     | Uncharacterized protein                         | 32 | 10 | 55.5  | 6.73 | 0.0022 |
| -0.8912 | I1JIV1     | Phytoeyanin domain-containing protein           | 18 | 2  | 25.8  | 4.75 | 0.0008 |
| -0.8942 | I1K8W1     | TPT domain-containing protein                   | 5  | 2  | 38.6  | 8.84 | 0.0199 |
| -0.8946 | A0A0R0L3G5 | Amino_oxidase domain-containing protein         | 5  | 3  | 66.8  | 7.87 | 0.0438 |
| -0.8960 | C6SVZ6     | AAI domain-containing protein                   | 47 | 3  | 12.4  | 7.96 | 0.0365 |
| -0.8998 | Q9SWA8     | Glycine-rich RNA-binding protein                | 61 | 8  | 15.8  | 7.20 | 0.0046 |
| -0.9000 | Q96446     | Actin (Fragment)                                | 38 | 5  | 22.4  | 5.62 | 0.0059 |
| -0.9007 | C6T447     | Uncharacterized protein                         | 40 | 6  | 25.1  | 6.35 | 0.0317 |
| -0.9009 | A0A0R0HDJ7 | PEROXIDASE_4 domain-containing protein          | 8  | 2  | 31.2  | 9.04 | 0.0174 |
| -0.9041 | I1LLM7     | Asparagine synthetase                           | 51 | 19 | 65.2  | 6.64 | 0.0195 |
| -0.9050 | D2D5G3     | Methyltransferase (EC 2.1.1.-)                  | 31 | 9  | 40.4  | 6.95 | 0.0362 |
| -0.9144 | C6SYP7     | Dirigent protein                                | 18 | 2  | 24.2  | 8.37 | 0.0050 |
| -0.9196 | A0A0R0FQV9 | Xyloglucan endotransglucosylase/hydrolase       | 28 | 7  | 33.7  | 6.93 | 0.0295 |
| -0.9221 | Q9ZNZ5     | Peroxidase (EC 1.11.1.7)                        | 36 | 8  | 38.5  | 8.13 | 0.0040 |
| -0.9227 | I1MER4     | PMR5N domain-containing protein                 | 28 | 6  | 42.3  | 8.75 | 0.0441 |
| -0.9269 | C6T487     | Uncharacterized protein                         | 19 | 3  | 19.8  | 7.09 | 0.0005 |
| -0.9269 | I1M4U9     | NAD(P)-bd_dom domain-containing protein         | 51 | 11 | 39.1  | 8.13 | 0.0070 |
| -0.9295 | A0A0R0IIS3 | Cas1_AcylT domain-containing protein            | 4  | 2  | 67.1  | 8.81 | 0.0133 |
| -0.9374 | K7KDX4     | Uncharacterized protein                         | 4  | 2  | 71.3  | 8.43 | 0.0345 |
| -0.9377 | B9VJS7     | Starch synthase IIa-2                           | 7  | 4  | 86.5  | 6.28 | 0.0039 |
| -0.9407 | I1MPK1     | Uncharacterized protein                         | 6  | 2  | 49.9  | 5.58 | 0.0040 |
| -0.9414 | A0A0R4J3J1 | Peroxidase (EC 1.11.1.7)                        | 43 | 11 | 35.2  | 8.06 | 0.0114 |
| -0.9415 | C6TIR2     | Uncharacterized protein                         | 58 | 5  | 16.9  | 4.27 | 0.0030 |
| -0.9434 | I1JDK6     | Uncharacterized protein                         | 12 | 4  | 50.7  | 6.92 | 0.0051 |
| -0.9435 | I1KBS7     | Uncharacterized protein                         | 39 | 12 | 62.5  | 4.86 | 0.0053 |
| -0.9452 | I1LPL0     | FAD-binding PCMH-type domain-containing protein | 47 | 19 | 66.0  | 8.22 | 0.0015 |
| -0.9459 | K7MCL5     | Flavin-containing monooxygenase (EC 1.-.-.-)    | 14 | 4  | 59.3  | 7.83 | 0.0226 |
| -0.9519 | Q2MJR5     | Myo-inositol-1-phosphate synthase               | 56 | 13 | 56.4  | 5.54 | 0.0056 |
| -0.9579 | C6TGB8     | Uncharacterized protein                         | 36 | 10 | 46.2  | 6.10 | 0.0009 |
| -0.9663 | I1K0L4     | Uncharacterized protein                         | 34 | 15 | 71.7  | 6.00 | 0.0158 |
| -0.9678 | K7LSM2     | Uncharacterized protein                         | 41 | 45 | 153.5 | 4.72 | 0.0025 |
| -0.9724 | I1LLM2     | Asparagine synthetase                           | 51 | 19 | 65.2  | 6.64 | 0.0159 |
| -0.9744 | C6ZGA8     | Somatic embryogenesis receptor kinase           | 11 | 3  | 68.9  | 5.73 | 0.0010 |
| -0.9775 | A0A0R0HYB1 | Uncharacterized protein                         | 59 | 18 | 51.6  | 8.34 | 0.0009 |
| -0.9792 | I1KL23     | Uncharacterized protein                         | 15 | 3  | 50.0  | 7.58 | 0.0096 |
| -0.9820 | C6TH72     | Fe2OG dioxygenase domain-containing protein     | 25 | 4  | 32.9  | 5.43 | 0.0055 |
| -0.9881 | K7N544     | CMP/dCMP-type deaminase                         | 26 | 3  | 20.6  | 5.16 | 0.0324 |
| -1.0002 | I1M712     | Oxygen-evolving enhancer protein 2              | 31 | 4  | 28.6  | 7.87 | 0.0330 |
| -1.0018 | C6T7J2     | Uncharacterized protein                         | 12 | 3  | 25.1  | 9.01 | 0.0156 |
| -1.0049 | C6TFS5     | Cytochrome b6-f complex iron-sulfur subunit     | 32 | 5  | 28.4  | 8.79 | 0.0145 |
| -1.0055 | K7MPZ4     | dUTPase domain-containing protein               | 43 | 3  | 15.7  | 5.53 | 0.0120 |
| -1.0128 | A0A0R4J339 | Uncharacterized protein                         | 18 | 6  | 82.3  | 8.54 | 0.0008 |
| -1.0136 | I1J4L0     | Uncharacterized protein                         | 5  | 2  | 58.2  | 8.65 | 0.0152 |
| -1.0138 | K7LQ40     | Pyr_redox_2 domain-containing protein           | 9  | 2  | 39.4  | 8.54 | 0.0079 |
| -1.0225 | C6SYE7     | Bet_v_1 domain-containing protein               | 55 | 6  | 17.6  | 6.52 | 0.0224 |

|         |            |                                                                                             |    |    |       |       |        |
|---------|------------|---------------------------------------------------------------------------------------------|----|----|-------|-------|--------|
| -1.0331 | I1KB60     | Uncharacterized protein                                                                     | 10 | 2  | 60.0  | 5.22  | 0.0165 |
| -1.0345 | I1JY06     | Uncharacterized protein                                                                     | 33 | 17 | 91.7  | 5.31  | 0.0001 |
| -1.0388 | C6T1T3     | Uncharacterized protein                                                                     | 35 | 4  | 22.4  | 6.07  | 0.0415 |
| -1.0487 | I1MBC5     | Asparagine synthetase                                                                       | 57 | 21 | 65.5  | 6.47  | 0.0011 |
| -1.0516 | I1M9W9     | Uncharacterized protein                                                                     | 4  | 2  | 107.0 | 7.27  | 0.0111 |
| -1.0562 | K7KRR7     | X8 domain-containing protein                                                                | 10 | 3  | 54.4  | 5.97  | 0.0025 |
| -1.0601 | C6THA9     | NAD(P)-bd_dom domain-containing protein                                                     | 51 | 11 | 39.1  | 8.13  | 0.0387 |
| -1.0659 | C6SYL5     | SHSP domain-containing protein                                                              | 20 | 2  | 22.2  | 6.21  | 0.0010 |
| -1.0660 | C6TDC0     | Uncharacterized protein                                                                     | 11 | 3  | 37.0  | 6.18  | 0.0062 |
| -1.0703 | I1KQC0     | Uncharacterized protein                                                                     | 15 | 6  | 68.8  | 8.95  | 0.0084 |
| -1.0753 | I1LU76     | Peroxidase (EC 1.11.1.7)                                                                    | 32 | 7  | 35.8  | 8.22  | 0.0143 |
| -1.0784 | C6ZS11     | Leucine-rich repeat resistance protein-like protein                                         | 12 | 3  | 37.1  | 8.38  | 0.0009 |
| -1.0830 | I1L8V8     | Uncharacterized protein                                                                     | 45 | 5  | 17.7  | 8.70  | 0.0372 |
| -1.1006 | I1M3S8     | Uncharacterized protein                                                                     | 4  | 3  | 85.7  | 5.12  | 0.0037 |
| -1.1057 | K7L413     | Hexosyltransferase (EC 2.4.1.-)                                                             | 6  | 3  | 75.9  | 8.92  | 0.0052 |
| -1.1079 | I1MTR7     | DUF4005 domain-containing protein                                                           | 14 | 6  | 65.0  | 9.47  | 0.0041 |
| -1.1098 | A0A0R0J569 | Uncharacterized protein                                                                     | 13 | 3  | 46.0  | 7.78  | 0.0000 |
| -1.1115 | C6T8W8     | PsbP domain-containing protein                                                              | 11 | 2  | 28.4  | 7.87  | 0.0323 |
| -1.1132 | A0A0R0GF09 | Uncharacterized protein                                                                     | 5  | 2  | 76.1  | 5.29  | 0.0289 |
| -1.1179 | I1KZH4     | FKS1_dom1 domain-containing protein                                                         | 2  | 3  | 225.6 | 9.09  | 0.0132 |
| -1.1219 | I1NHP0     | Uncharacterized protein                                                                     | 16 | 9  | 117.7 | 6.87  | 0.0168 |
| -1.1295 | A0A0R0IA82 | Peptidase A1 domain-containing protein                                                      | 14 | 3  | 52.8  | 5.35  | 0.0017 |
| -1.1319 | I1LSM1     | Phytoeyanin domain-containing protein                                                       | 20 | 3  | 22.8  | 6.92  | 0.0130 |
| -1.1339 | I1NIY9     | Mitochondrial Rho GTPase (EC 3.6.5.-)                                                       | 43 | 16 | 71.9  | 5.54  | 0.0081 |
| -1.1380 | C6THI3     | PKS_ER domain-containing protein                                                            | 58 | 12 | 39.1  | 6.84  | 0.0490 |
| -1.1458 | C6TNI2     | Lipase_3 domain-containing protein                                                          | 13 | 4  | 55.0  | 8.13  | 0.0011 |
| -1.1459 | C6SVL0     | Uncharacterized protein                                                                     | 47 | 6  | 21.8  | 5.33  | 0.0222 |
| -1.1488 | I1KG57     | Uncharacterized protein                                                                     | 32 | 9  | 46.6  | 5.88  | 0.0207 |
| -1.1492 | I1JBj9     | Endoglucanase (EC 3.2.1.4)                                                                  | 8  | 2  | 56.6  | 9.22  | 0.0138 |
| -1.1507 | I1KVS6     | D-3-phosphoglycerate dehydrogenase (EC 1.1.1.95)                                            | 34 | 12 | 66.0  | 6.90  | 0.0069 |
| -1.1553 | A0A0R0L0K1 | Uncharacterized protein                                                                     | 10 | 4  | 62.4  | 9.07  | 0.0009 |
| -1.1569 | I1M9S1     | Plasma membrane ATPase (EC 7.1.2.1)                                                         | 32 | 22 | 104.6 | 7.21  | 0.0133 |
| -1.1655 | I1MCZ5     | LEA_2 domain-containing protein                                                             | 12 | 2  | 27.9  | 10.27 | 0.0011 |
| -1.1662 | I1ND63     | LRRNT_2 domain-containing protein                                                           | 21 | 7  | 50.3  | 8.05  | 0.0189 |
| -1.1674 | I1KYQ1     | Glycosyltransferase (EC 2.4.1.-)                                                            | 7  | 2  | 51.5  | 5.92  | 0.0312 |
| -1.1683 | I1L3X9     | Sucrose synthase (EC 2.4.1.13)                                                              | 11 | 6  | 104.1 | 7.06  | 0.0263 |
| -1.1813 | I1LDH2     | Tr-type G domain-containing protein                                                         | 9  | 8  | 147.0 | 5.30  | 0.0492 |
| -1.1853 | C6TGB4     | Uncharacterized protein                                                                     | 12 | 2  | 29.9  | 9.28  | 0.0433 |
| -1.1901 | A0A0R0GA40 | Uncharacterized protein                                                                     | 13 | 3  | 50.8  | 6.01  | 0.0087 |
| -1.1996 | I1JWW4     | Uncharacterized protein                                                                     | 12 | 2  | 31.1  | 5.12  | 0.0109 |
| -1.2233 | B0M194     | Peroxisomal 3-hydroxyacyl-CoA dehydrogenase                                                 | 12 | 2  | 35.0  | 9.45  | 0.0002 |
| -1.2318 | I1K510     | Uncharacterized protein                                                                     | 18 | 8  | 93.7  | 5.17  | 0.0058 |
| -1.2489 | C6SX14     | Ferredoxin                                                                                  | 49 | 3  | 16.5  | 6.89  | 0.0047 |
| -1.2535 | A0A0R0KYU7 | Xyloglucan endotransglucosylase/hydrolase                                                   | 29 | 8  | 36.0  | 8.25  | 0.0024 |
| -1.2553 | K7MK51     | Uncharacterized protein                                                                     | 7  | 4  | 87.6  | 6.98  | 0.0134 |
| -1.2575 | A0A0R4J2V8 | Dirigent protein                                                                            | 28 | 3  | 23.9  | 6.28  | 0.0078 |
| -1.2630 | I1MJP8     | Cellulose synthase (EC 2.4.1.12)                                                            | 17 | 10 | 119.9 | 7.02  | 0.0070 |
| -1.2642 | I1K702     | PLCXc domain-containing protein                                                             | 26 | 5  | 36.2  | 8.02  | 0.0166 |
| -1.2725 | K7KCU6     | Protein kinase domain-containing protein                                                    | 6  | 3  | 92.0  | 8.16  | 0.0004 |
| -1.2759 | A0A0R0LFB4 | Dihydrolipoamide acetyltransferase component of pyruvate dehydrogenase complex (EC 2.3.1.-) | 21 | 8  | 47.9  | 8.70  | 0.0348 |
| -1.2815 | K7KZ57     | Uncharacterized protein                                                                     | 5  | 2  | 51.6  | 6.42  | 0.0003 |
| -1.2902 | A8HTK0     | Thioredoxin                                                                                 | 51 | 4  | 13.3  | 5.53  | 0.0043 |
| -1.2907 | K7LJA2     | Uncharacterized protein                                                                     | 8  | 2  | 51.2  | 6.02  | 0.0365 |
| -1.2907 | C6TGT5     | Uncharacterized protein                                                                     | 9  | 2  | 37.7  | 7.03  | 0.0446 |
| -1.3005 | I1KD34     | COBRA-like protein                                                                          | 14 | 3  | 50.7  | 8.60  | 0.0005 |
| -1.3011 | A0A0R0KSI5 | TPR_REGION domain-containing protein                                                        | 7  | 3  | 37.7  | 8.73  | 0.0081 |

|         |            |                                                 |    |    |       |      |        |
|---------|------------|-------------------------------------------------|----|----|-------|------|--------|
| -1.3121 | A0A0R0JAB1 | Auxin efflux carrier component                  | 4  | 2  | 60.7  | 7.06 | 0.0043 |
| -1.3207 | C6SVM4     | Uncharacterized protein                         | 35 | 4  | 22.3  | 5.82 | 0.0080 |
| -1.3253 | A0A0R0K0E5 | FAD-binding PCMH-type domain-containing protein | 10 | 4  | 59.2  | 7.85 | 0.0062 |
| -1.3388 | I1MBL5     | Uncharacterized protein                         | 40 | 15 | 57.9  | 8.75 | 0.0002 |
| -1.3414 | A0A0R0JPK0 | AAA domain-containing protein                   | 5  | 4  | 133.9 | 6.65 | 0.0039 |
| -1.3499 | I1KSC1     | Uncharacterized protein                         | 11 | 5  | 66.5  | 8.19 | 0.0000 |
| -1.3504 | I1LCX5     | Uncharacterized protein                         | 8  | 3  | 67.3  | 6.49 | 0.0249 |
| -1.3541 | A0A0R0FND6 | Elongation factor G, chloroplastic (cEF-G)      | 10 | 4  | 86.8  | 5.77 | 0.0401 |
| -1.3587 | I1M9K9     | Uncharacterized protein                         | 25 | 8  | 39.8  | 7.74 | 0.0030 |
| -1.3613 | C6ZRR4     | NAK-type protein kinase                         | 8  | 5  | 102.2 | 6.34 | 0.0001 |
| -1.3631 | I1KWE5     | RRM domain-containing protein                   | 10 | 2  | 26.2  | 4.86 | 0.0438 |
| -1.3646 | Q9SWB5     | Seed maturation protein PM37                    | 43 | 12 | 46.3  | 6.28 | 0.0335 |
| -1.3819 | K7N361     | Lipase                                          | 11 | 3  | 49.2  | 7.23 | 0.0169 |
| -1.3923 | I1LA99     | Uncharacterized protein                         | 10 | 4  | 86.2  | 5.92 | 0.0003 |
| -1.3936 | C6SZA9     | Bet_v_1 domain-containing protein               | 44 | 6  | 17.1  | 5.25 | 0.0381 |
| -1.3946 | Q2MJR4     | Myo-inositol-1-phosphate synthase               | 40 | 9  | 56.4  | 5.67 | 0.0203 |
| -1.3984 | C6TMX0     | Xyloglucan endotransglucosylase/hydrolase       | 31 | 8  | 34.4  | 8.95 | 0.0009 |
| -1.3986 | C6TD35     | PABS domain-containing protein                  | 9  | 2  | 37.0  | 5.40 | 0.0247 |
| -1.4082 | K7M8I6     | Uncharacterized protein                         | 6  | 3  | 60.9  | 6.55 | 0.0041 |
| -1.4095 | K7N057     | Hexosyltransferase (EC 2.4.1.-)                 | 10 | 3  | 61.8  | 8.21 | 0.0424 |
| -1.4100 | I1JG92     | Uncharacterized protein                         | 12 | 5  | 86.3  | 6.23 | 0.0181 |
| -1.4130 | I1N4W1     | PMR5N domain-containing protein                 | 24 | 6  | 51.3  | 8.51 | 0.0002 |
| -1.4238 | K7KQQ0     | Uncharacterized protein                         | 13 | 2  | 30.8  | 7.28 | 0.0009 |
| -1.4250 | C6TM76     | DUF1279 domain-containing protein               | 15 | 2  | 20.6  | 9.32 | 0.0219 |
| -1.4378 | I1N6I1     | Hexosyltransferase (EC 2.4.1.-)                 | 8  | 3  | 63.1  | 8.48 | 0.0170 |
| -1.4513 | C6T736     | V-SNARE domain-containing protein               | 42 | 6  | 24.7  | 9.50 | 0.0002 |
| -1.4661 | I1MS92     | Uncharacterized protein                         | 5  | 2  | 55.0  | 8.28 | 0.0040 |
| -1.4664 | I1L3E3     | Uncharacterized protein                         | 6  | 2  | 39.4  | 9.48 | 0.0023 |
| -1.4795 | I1L546     | NmrA domain-containing protein                  | 11 | 2  | 35.6  | 6.62 | 0.0051 |
| -1.4930 | A0A0R0IYY7 | Uncharacterized protein                         | 51 | 19 | 59.0  | 8.65 | 0.0023 |
| -1.4941 | K7LP97     | RRM domain-containing protein                   | 42 | 5  | 16.9  | 8.12 | 0.0031 |
| -1.4980 | C6SXA1     | CS domain-containing protein                    | 41 | 3  | 19.4  | 4.55 | 0.0325 |
| -1.5002 | I1L0Z7     | Uncharacterized protein                         | 6  | 6  | 168.3 | 7.47 | 0.0060 |
| -1.5047 | I1KEH1     | Phytoeyanin domain-containing protein           | 20 | 3  | 23.2  | 7.87 | 0.0024 |
| -1.5144 | K7KPK3     | Uncharacterized protein                         | 28 | 11 | 73.0  | 4.30 | 0.0096 |
| -1.5167 | I1JUE0     | Cellulose synthase (EC 2.4.1.12)                | 28 | 19 | 122.0 | 6.76 | 0.0004 |
| -1.5313 | I1JT65     | Uncharacterized protein                         | 18 | 4  | 40.1  | 6.37 | 0.0019 |
| -1.5410 | A0A0R4J645 | Uncharacterized protein                         | 9  | 2  | 41.6  | 5.45 | 0.0390 |
| -1.5523 | C6SYN8     | Uncharacterized protein                         | 24 | 2  | 15.5  | 7.96 | 0.0111 |
| -1.5613 | I1LL85     | Uncharacterized protein                         | 5  | 2  | 60.7  | 8.48 | 0.0017 |
| -1.5616 | I1NII6     | IPPC domain-containing protein                  | 2  | 2  | 127.2 | 6.47 | 0.0420 |
| -1.5666 | C6TA63     | Uncharacterized protein                         | 7  | 2  | 47.8  | 7.42 | 0.0143 |
| -1.5768 | I1JXR7     | Exostosin domain-containing protein             | 12 | 3  | 47.1  | 6.65 | 0.0020 |
| -1.5769 | Q06765     | ADR6 protein (Sali5-4a protein)                 | 52 | 8  | 30.4  | 6.84 | 0.0008 |
| -1.5800 | I1KNV8     | Uncharacterized protein                         | 14 | 7  | 95.1  | 5.14 | 0.0147 |
| -1.5954 | K7LCZ8     | Cellulose synthase (EC 2.4.1.12)                | 20 | 11 | 120.1 | 7.39 | 0.0011 |
| -1.5961 | I1LZW4     | Tr-type G domain-containing protein             | 16 | 11 | 109.9 | 5.24 | 0.0064 |
| -1.6205 | I1LCV9     | Carboxypeptidase (EC 3.4.16.-)                  | 16 | 6  | 56.0  | 5.38 | 0.0039 |
| -1.6243 | K7K6S5     | AB hydrolase-1 domain-containing protein        | 16 | 2  | 29.3  | 5.60 | 0.0280 |
| -1.6311 | I1L7W1     | Uncharacterized protein                         | 4  | 4  | 167.6 | 8.15 | 0.0420 |
| -1.6536 | I1MUR9     | GMC_OxRdtase_N domain-containing protein        | 6  | 3  | 62.9  | 6.84 | 0.0045 |
| -1.6590 | A0A0R0JQU1 | Uncharacterized protein                         | 34 | 5  | 32.9  | 4.93 | 0.0355 |
| -1.6670 | A0A0R0INP8 | Peroxidase (EC 1.11.1.7)                        | 29 | 7  | 34.5  | 8.90 | 0.0162 |
| -1.6803 | I1KRB5     | FAD-binding PCMH-type domain-containing protein | 33 | 12 | 58.8  | 8.70 | 0.0006 |
| -1.6901 | Q2LAL0     | Cytochrome P450 monooxygenase CYP81E11          | 22 | 6  | 57.9  | 8.91 | 0.0129 |
| -1.6975 | I1MLV5     | Fe2OG dioxygenase domain-containing protein     | 32 | 7  | 35.8  | 5.69 | 0.0420 |
| -1.7055 | I1LDY8     | Uncharacterized protein                         | 23 | 5  | 52.1  | 7.80 | 0.0004 |

|         |            |                                                 |    |    |       |      |        |
|---------|------------|-------------------------------------------------|----|----|-------|------|--------|
| -1.7130 | I1J7C0     | Uncharacterized protein                         | 11 | 2  | 37.3  | 4.88 | 0.0022 |
| -1.7390 | I1KTE1     | Cellulose synthase (EC 2.4.1.12)                | 12 | 8  | 123.9 | 6.93 | 0.0002 |
| -1.7525 | A0A0R0K0I4 | X8 domain-containing protein                    | 6  | 2  | 62.3  | 6.13 | 0.0105 |
| -1.7569 | A0A0R0FVX1 | Uncharacterized protein                         | 32 | 12 | 58.6  | 7.37 | 0.0002 |
| -1.8050 | I1JTX2     | Uncharacterized protein                         | 16 | 3  | 28.2  | 9.83 | 0.0285 |
| -1.8576 | I1JIW7     | Uncharacterized protein                         | 30 | 7  | 24.9  | 9.42 | 0.0020 |
| -1.8765 | A0A0R0EUW6 | Uncharacterized protein                         | 9  | 3  | 57.6  | 8.38 | 0.0019 |
| -1.9205 | C6SZ34     | Uncharacterized protein                         | 9  | 2  | 23.8  | 6.61 | 0.0114 |
| -1.9238 | I1LJ10     | Peptidyl-prolyl cis-trans isomerase             | 11 | 2  | 26.1  | 7.34 | 0.0003 |
| -1.9262 | I1K2X6     | FAD-binding PCMH-type domain-containing protein | 30 | 11 | 59.5  | 9.03 | 0.0352 |
| -1.9269 | A0A0R0EHS8 | PMR5N domain-containing protein                 | 33 | 3  | 20.5  | 8.31 | 0.0129 |
| -1.9454 | K7M4N7     | Uncharacterized protein                         | 4  | 2  | 65.1  | 8.12 | 0.0272 |
| -1.9505 | I1LHJ6     | SHNi-TPR domain-containing protein              | 23 | 6  | 50.1  | 4.54 | 0.0000 |
| -1.9539 | Q8S564     | 4-coumarate:coenzyme A ligase (EC 6.2.1.12)     | 26 | 9  | 59.3  | 5.91 | 0.0005 |
| -1.9568 | I1K8W4     | Cellulose synthase (EC 2.4.1.12)                | 28 | 18 | 122.0 | 6.76 | 0.0177 |
| -1.9569 | I1JWM6     | COBRA-like protein                              | 10 | 2  | 50.6  | 8.68 | 0.0001 |
| -1.9642 | A0A0R0FEC7 | Lipase_3 domain-containing protein              | 7  | 2  | 54.3  | 5.96 | 0.0324 |
| -1.9841 | C6TN54     | Uncharacterized protein                         | 10 | 2  | 47.1  | 7.08 | 0.0397 |
| -1.9867 | I1K3A6     | Uncharacterized protein                         | 10 | 4  | 64.3  | 6.57 | 0.0000 |
| -2.0067 | K7KEZ6     | Uncharacterized protein                         | 6  | 2  | 78.8  | 5.31 | 0.0229 |
| -2.0407 | C6TNZ5     | Uncharacterized protein                         | 12 | 2  | 33.0  | 6.35 | 0.0075 |
| -2.0454 | A8C8H5     | Glutamate decarboxylase (EC 4.1.1.15)           | 59 | 19 | 57.2  | 5.82 | 0.0030 |
| -2.0668 | I1MY41     | Uncharacterized protein                         | 13 | 5  | 61.3  | 6.65 | 0.0004 |
| -2.0698 | I1ND18     | Uncharacterized protein                         | 9  | 3  | 73.8  | 6.83 | 0.0088 |
| -2.0736 | I1J7C7     | RanBD1 domain-containing protein                | 21 | 3  | 25.6  | 4.72 | 0.0041 |
| -2.0744 | A0A024FRX1 | Glycosyltransferase (EC 2.4.1.-)                | 10 | 3  | 52.2  | 6.14 | 0.0044 |
| -2.0813 | I1K6B1     | NAB domain-containing protein                   | 5  | 4  | 139.4 | 4.94 | 0.0444 |
| -2.1017 | I1MWI1     | zinc_ribbon_10 domain-containing protein        | 9  | 2  | 44.8  | 8.84 | 0.0002 |
| -2.1115 | I1N843     | Glyceraldehyde-3-phosphate dehydrogenase        | 47 | 14 | 43.2  | 8.25 | 0.0003 |
| -2.1141 | K7L4Y5     | Pectinesterase (EC 3.1.1.11)                    | 5  | 2  | 57.8  | 8.68 | 0.0278 |
| -2.1160 | I1LM80     | Sucrose synthase (EC 2.4.1.13)                  | 5  | 3  | 95.7  | 6.99 | 0.0142 |
| -2.1251 | C6TIQ7     | Cytochrome c domain-containing protein          | 48 | 8  | 33.6  | 6.95 | 0.0302 |
| -2.1467 | I1M4H1     | Carboxypeptidase (EC 3.4.16.-)                  | 11 | 3  | 56.4  | 5.74 | 0.0317 |
| -2.1473 | C6SZQ8     | Phytoeyanin domain-containing protein           | 24 | 2  | 17.3  | 6.76 | 0.0004 |
| -2.1571 | A0A0R0F859 | Epimerase domain-containing protein             | 28 | 6  | 35.1  | 5.83 | 0.0027 |
| -2.1817 | A0A0R0G7V6 | Uncharacterized protein                         | 5  | 2  | 62.8  | 6.99 | 0.0107 |
| -2.1866 | I1MXX3     | Uncharacterized protein                         | 21 | 2  | 16.5  | 9.31 | 0.0075 |
| -2.1996 | I1JB2      | Uncharacterized protein                         | 45 | 11 | 50.2  | 6.99 | 0.0157 |
| -2.2028 | I1KNP5     | Endoglucanase (EC 3.2.1.4)                      | 9  | 4  | 68.7  | 8.72 | 0.0392 |
| -2.2043 | A0A0R0HPC7 | Pectate lyase (EC 4.2.2.2)                      | 5  | 2  | 42.1  | 8.09 | 0.0012 |
| -2.2179 | K7MAF0     | Lipase_GDSL domain-containing protein           | 8  | 2  | 41.3  | 5.91 | 0.0338 |
| -2.2345 | I1NAW5     | Uncharacterized protein                         | 15 | 3  | 50.5  | 6.71 | 0.0001 |
| -2.2369 | I1L0J1     | Uncharacterized protein                         | 5  | 2  | 52.9  | 5.16 | 0.0019 |
| -2.2470 | Q6Q2Z8     | Phosphoenolpyruvate carboxylase (EC 4.1.1.31)   | 31 | 23 | 110.5 | 6.42 | 0.0083 |
| -2.2561 | I1JY96     | Protein kinase domain-containing protein        | 6  | 3  | 113.6 | 7.11 | 0.0009 |
| -2.2646 | C6TF22     | Uncharacterized protein                         | 14 | 3  | 39.5  | 4.91 | 0.0317 |
| -2.2818 | I1MVV4     | Uncharacterized protein                         | 3  | 2  | 125.9 | 5.22 | 0.0181 |
| -2.2828 | I1JN04     | Uncharacterized protein                         | 11 | 4  | 57.7  | 8.53 | 0.0030 |
| -2.3166 | A0A0R0LFG1 | Uncharacterized protein                         | 4  | 2  | 118.6 | 6.55 | 0.0286 |
| -2.3407 | Q2LAL4     | Cytochrome P450 monooxygenase CYP83E8           | 38 | 13 | 57.4  | 7.96 | 0.0130 |
| -2.3421 | I1LRM9     | Uncharacterized protein                         | 12 | 2  | 50.4  | 7.08 | 0.0082 |
| -2.3426 | A0A0R0HZ32 | Uncharacterized protein                         | 13 | 2  | 20.0  | 5.30 | 0.0175 |
| -2.3620 | I1KRH0     | AAA domain-containing protein                   | 9  | 2  | 45.4  | 6.29 | 0.0471 |
| -2.3771 | I1JNM0     | PMR5N domain-containing protein                 | 9  | 2  | 70.1  | 8.43 | 0.0021 |
| -2.3948 | I1MMC2     | t-SNARE coiled-coil homology protein            | 18 | 3  | 30.0  | 6.32 | 0.0002 |
| -2.4308 | Q9XFI6     | Peroxidase (EC 1.11.1.7)                        | 23 | 5  | 37.4  | 8.35 | 0.0039 |
| -2.4507 | A0A024FRL5 | Glycosyltransferase (EC 2.4.1.-)                | 8  | 2  | 52.0  | 5.92 | 0.0367 |

|         |            |                                               |    |    |       |      |        |
|---------|------------|-----------------------------------------------|----|----|-------|------|--------|
| -2.4594 | I1M3B6     | Uncharacterized protein                       | 3  | 2  | 131.6 | 7.34 | 0.0403 |
| -2.4654 | A0A0R0I5R9 | Uncharacterized protein                       | 38 | 12 | 48.0  | 6.52 | 0.0004 |
| -2.5444 | I1KZ04     | Cytochrome b561 and DOMON protein             | 13 | 3  | 43.2  | 9.38 | 0.0001 |
| -2.5473 | I1K6Q2     | Uncharacterized protein                       | 12 | 3  | 48.3  | 5.78 | 0.0030 |
| -2.5572 | K7N525     | ATP-grasp domain-containing protein           | 13 | 5  | 68.6  | 6.83 | 0.0429 |
| -2.5629 | A0A0R0L0I9 | HTH myb-type domain-containing protein        | 2  | 2  | 46.7  | 6.84 | 0.0042 |
| -2.5631 | A0A0R0JLI3 | Epimerase domain-containing protein           | 7  | 2  | 36.6  | 8.54 | 0.0090 |
| -2.5955 | C6T8K0     | LEA_2 domain-containing protein               | 19 | 4  | 34.2  | 9.94 | 0.0001 |
| -2.6228 | C6T3V3     | Glutathione peroxidase                        | 18 | 3  | 19.1  | 9.61 | 0.0006 |
| -2.6234 | I1L158     | Cellulose synthase (EC 2.4.1.12)              | 6  | 3  | 119.2 | 7.62 | 0.0045 |
| -2.6305 | I1KWS8     | Glyco_hydro_19_cat domain-containing protein  | 10 | 2  | 36.0  | 6.27 | 0.0002 |
| -2.6349 | K7M1F7     | Lipase_GDSL domain-containing protein         | 8  | 2  | 40.5  | 7.91 | 0.0014 |
| -2.6350 | I1KH95     | Uncharacterized protein                       | 5  | 2  | 93.0  | 8.76 | 0.0117 |
| -2.6361 | I1KW02     | BURP domain-containing protein                | 12 | 2  | 30.2  | 7.94 | 0.0093 |
| -2.6939 | C6TK45     | Uncharacterized protein                       | 8  | 2  | 43.8  | 8.46 | 0.0000 |
| -2.6972 | C6TEQ7     | Lipase_GDSL domain-containing protein         | 15 | 2  | 37.8  | 7.85 | 0.0028 |
| -2.7071 | I1ML02     | Uncharacterized protein                       | 8  | 4  | 69.9  | 6.62 | 0.0370 |
| -2.7185 | I1MFX5     | Endoglucanase (EC 3.2.1.4)                    | 13 | 6  | 68.3  | 8.66 | 0.0004 |
| -2.7597 | C6TL20     | Lipase_GDSL domain-containing protein         | 31 | 7  | 40.2  | 6.10 | 0.0239 |
| -2.7866 | Q43468     | Hsp70-Hsp90 organizing protein 1              | 17 | 7  | 64.1  | 5.69 | 0.0484 |
| -2.7964 | I1N641     | Uncharacterized protein                       | 16 | 14 | 136.1 | 7.99 | 0.0004 |
| -2.8418 | A0A0R0EB47 | Uncharacterized protein                       | 6  | 2  | 35.3  | 9.63 | 0.0003 |
| -2.8662 | I1JFT2     | Glycosyltransferase (EC 2.4.1.-)              | 6  | 2  | 54.9  | 6.52 | 0.0008 |
| -2.8832 | A0A0R4J4M3 | FAS1 domain-containing protein                | 13 | 2  | 27.8  | 8.88 | 0.0142 |
| -3.0075 | C6TD22     | Glyco_hydro_19_cat domain-containing protein  | 15 | 3  | 36.4  | 6.51 | 0.0013 |
| -3.0221 | C6KHU4     | Phenylalanine ammonia-lyase (EC 4.3.1.24)     | 41 | 16 | 78.1  | 6.19 | 0.0000 |
| -3.0364 | I1K0W4     | Glutamate dehydrogenase                       | 17 | 4  | 44.8  | 6.61 | 0.0042 |
| -3.1029 | I1LWJ6     | Uncharacterized protein                       | 17 | 14 | 136.0 | 7.99 | 0.0000 |
| -3.1682 | I1LRC1     | Uncharacterized protein                       | 21 | 9  | 62.5  | 9.11 | 0.0000 |
| -3.1737 | I1LH27     | Tubulin alpha chain                           | 56 | 20 | 49.7  | 5.06 | 0.0251 |
| -3.1762 | A0A0R4J551 | Phytoeyanin domain-containing protein         | 19 | 2  | 20.9  | 7.36 | 0.0001 |
| -3.1764 | A0A0R0FGJ1 | Protein kinase domain-containing protein      | 4  | 2  | 95.1  | 6.23 | 0.0010 |
| -3.1958 | I1M9G4     | Uncharacterized protein                       | 8  | 2  | 41.2  | 8.56 | 0.0491 |
| -3.2692 | I1K345     | AAA domain-containing protein                 | 9  | 2  | 45.3  | 6.48 | 0.0173 |
| -3.3016 | K7LCS5     | Flavin-containing monooxygenase (EC 1.-.-.-)  | 6  | 2  | 59.5  | 7.55 | 0.0219 |
| -3.3052 | I1K8B5     | Uncharacterized protein                       | 11 | 2  | 53.5  | 6.13 | 0.0151 |
| -3.3169 | Q70MR6     | Ornithine decarboxylase (EC 4.1.1.17)         | 9  | 2  | 46.4  | 5.49 | 0.0254 |
| -3.3921 | I1M8S3     | Uncharacterized protein                       | 36 | 15 | 82.1  | 7.39 | 0.0008 |
| -3.3979 | A0A0R0IBM9 | CMP/dCMP-type deaminase protein               | 19 | 3  | 20.7  | 5.86 | 0.0003 |
| -3.4434 | K7MR59     | NAD(P)-bd_dom domain-containing protein       | 26 | 8  | 74.3  | 6.67 | 0.0316 |
| -3.5126 | I1JSP4     | X8 domain-containing protein                  | 10 | 2  | 48.3  | 5.16 | 0.0132 |
| -3.5235 | I1JIM1     | WBb98N11.19 protein                           | 5  | 2  | 64.5  | 6.62 | 0.0034 |
| -3.5282 | A1Z0H8     | D-myo-inositol 3-phosphate synthase           | 50 | 12 | 56.4  | 5.39 | 0.0298 |
| -3.5484 | A0A0R4J2X1 | Uncharacterized protein                       | 8  | 2  | 44.0  | 8.34 | 0.0007 |
| -3.5681 | C6T5R3     | PH domain-containing protein                  | 27 | 2  | 16.8  | 8.65 | 0.0010 |
| -3.5685 | I1LVS4     | Uncharacterized protein                       | 27 | 9  | 61.7  | 5.20 | 0.0102 |
| -3.6429 | I1NHU7     | Uncharacterized protein                       | 10 | 2  | 39.0  | 6.29 | 0.0076 |
| -3.6936 | I1N019     | Uncharacterized protein                       | 12 | 4  | 72.2  | 6.25 | 0.0026 |
| -3.6972 | K7K8V7     | C2 domain-containing protein                  | 2  | 3  | 229.9 | 5.62 | 0.0283 |
| -3.7284 | A0A0R0I9A1 | 3-ketoacyl-CoA synthase (EC 2.3.1.-)          | 14 | 4  | 56.1  | 8.90 | 0.0005 |
| -3.7480 | I1MVG7     | Uncharacterized protein                       | 23 | 7  | 76.9  | 4.35 | 0.0011 |
| -3.7670 | I1K8I9     | 3-ketoacyl-CoA synthase (EC 2.3.1.-)          | 5  | 2  | 60.7  | 9.13 | 0.0003 |
| -3.7712 | I1KX04     | Phospholipid-transporting ATPase (EC 7.6.2.1) | 7  | 3  | 135.8 | 6.93 | 0.0032 |
| -3.8203 | I1L5J4     | Uncharacterized protein                       | 7  | 2  | 45.5  | 8.72 | 0.0008 |
| -3.8488 | C6TKJ2     | Xyloglucan endotransglucosylase/hydrolase     | 35 | 7  | 35.6  | 8.37 | 0.0018 |
| -3.8551 | K7MNZ5     | Uncharacterized protein                       | 15 | 3  | 40.4  | 6.70 | 0.0081 |
| -3.9002 | I1M8D6     | X8 domain-containing protein                  | 7  | 2  | 51.2  | 5.19 | 0.0286 |

|          |            |                                                      |    |    |       |      |        |
|----------|------------|------------------------------------------------------|----|----|-------|------|--------|
| -3.9470  | I1KPI3     | Endoglucanase (EC 3.2.1.4)                           | 6  | 3  | 68.7  | 8.72 | 0.0019 |
| -4.0320  | I1M228     | Eukaryotic translation initiation factor 3 subunit D | 38 | 11 | 63.7  | 5.69 | 0.0050 |
| -4.1000  | I1MXJ1     | Uncharacterized protein                              | 36 | 15 | 82.2  | 7.09 | 0.0005 |
| -4.1306  | I1JT08     | Uncharacterized protein                              | 10 | 3  | 81.4  | 6.67 | 0.0045 |
| -4.1386  | A0A0R4J3Q3 | ABC transporter domain-containing protein            | 33 | 4  | 28.3  | 5.90 | 0.0000 |
| -4.2154  | I1LTU5     | Uncharacterized protein                              | 18 | 6  | 48.5  | 7.47 | 0.0009 |
| -4.2554  | A0A0R0F5B0 | Epimerase domain-containing protein                  | 10 | 2  | 48.3  | 9.67 | 0.0305 |
| -4.2622  | I1NGD0     | Lipoxygenase (EC 1.13.11.-)                          | 12 | 6  | 97.9  | 6.70 | 0.0060 |
| -4.3929  | I1KCA8     | Elongation factor Tu                                 | 39 | 13 | 52.1  | 6.68 | 0.0019 |
| -4.3964  | I1MUQ1     | ThiF domain-containing protein                       | 36 | 9  | 46.7  | 4.75 | 0.0001 |
| -4.4399  | I1KYC4     | Peptidase A1 domain-containing protein               | 15 | 4  | 51.9  | 8.07 | 0.0020 |
| -4.4419  | A0A0R0I8A1 | Xyloglucan endotransglucosylase/hydrolase            | 41 | 7  | 29.9  | 7.96 | 0.0036 |
| -4.4849  | I1JDD7     | Cellulose synthase (EC 2.4.1.12)                     | 11 | 7  | 121.4 | 7.18 | 0.0004 |
| -4.5580  | I1LKW4     | Uncharacterized protein                              | 21 | 9  | 62.4  | 9.11 | 0.0025 |
| -4.5689  | C6T020     | Glutathione peroxidase                               | 33 | 3  | 18.7  | 5.72 | 0.0002 |
| -4.6311  | K7MQS3     | Peptidase A1 domain-containing protein               | 16 | 3  | 52.0  | 8.12 | 0.0002 |
| -4.6353  | I1LZ94     | Phenylalanine ammonia-lyase (EC 4.3.1.24)            | 38 | 15 | 78.1  | 6.10 | 0.0158 |
| -4.7179  | C6TKY7     | Str_synth domain-containing protein                  | 8  | 2  | 38.8  | 7.81 | 0.0177 |
| -4.7451  | I1MC22     | Lipase_GDSL domain-containing protein                | 10 | 2  | 39.9  | 7.85 | 0.0001 |
| -4.8272  | I1NA96     | Phenylalanine ammonia-lyase (EC 4.3.1.24)            | 28 | 11 | 77.7  | 6.49 | 0.0002 |
| -4.8630  | K7N4G1     | Uncharacterized protein                              | 33 | 10 | 46.6  | 6.79 | 0.0002 |
| -5.0003  | Q70MR5     | Ornithine decarboxylase (EC 4.1.1.17)                | 9  | 2  | 46.3  | 5.60 | 0.0016 |
| -5.1048  | I1LPJ0     | ATP-dependent Clp protease proteolytic subunit       | 31 | 4  | 25.9  | 7.17 | 0.0009 |
| -5.1694  | I1N0I7     | t-SNARE coiled-coil homology protein                 | 16 | 3  | 28.1  | 8.90 | 0.0000 |
| -5.4933  | A0A0R0GCM7 | CMP/dCMP-type deaminase protein                      | 19 | 3  | 20.6  | 6.13 | 0.0119 |
| -5.8435  | A0A0R0FB78 | Uncharacterized protein                              | 33 | 8  | 45.8  | 8.43 | 0.0006 |
| -5.9738  | A0A0R0KUR1 | Phenylalanine ammonia-lyase (EC 4.3.1.24)            | 20 | 9  | 77.9  | 6.42 | 0.0002 |
| -6.0109  | K7MPG5     | Uncharacterized protein                              | 28 | 6  | 42.4  | 8.29 | 0.0002 |
| -6.4346  | I1M5G8     | Malic enzyme                                         | 27 | 9  | 71.3  | 7.55 | 0.0025 |
| -7.1872  | I1LJF7     |                                                      | 8  | 3  | 56.5  | 9.38 | 0.0000 |
| -10.9263 | A0A0R0EIR6 | Glycosyltransferase                                  | 36 | 9  | 54.4  | 5.92 | 0.0000 |

Abbreviation means as follows: Cov, coverage; MP, matched protein; MW, molecular weight; Cal, calculated.  
Grey background is to proteins not considered to be differentially accumulated.

Supplemental Table S2. List of changed proteins in mutant soybean under flooding compared with non-flooding

| Fold change | Accession  | Protein names                                         | Cov (%) | MP | MW (kDa) | Calc pI | p-value |
|-------------|------------|-------------------------------------------------------|---------|----|----------|---------|---------|
| 9.6946      | Q0WX05     | Polygalacturonase inhibiting protein                  | 50      | 10 | 36.8     | 8.34    | 0.0002  |
| 9.5204      | C6T390     | Uncharacterized protein                               | 55      | 6  | 16.2     | 5.91    | 0.0001  |
| 7.7448      | A0A0R0GEW3 | Uncharacterized protein                               | 11      | 3  | 30.6     | 6.80    | 0.0004  |
| 7.7396      | Q42785     | Nonsymbiotic hemoglobin                               | 22      | 3  | 18.0     | 8.92    | 0.0000  |
| 6.7396      | I1JY29     | Uncharacterized protein                               | 42      | 10 | 41.2     | 6.00    | 0.0003  |
| 6.5628      | I1NF01     | Uncharacterized protein                               | 13      | 8  | 80.1     | 6.13    | 0.0000  |
| 6.3346      | Q0WX04     | Polygalacturonase inhibiting protein                  | 19      | 3  | 37.5     | 8.91    | 0.0004  |
| 6.2153      | C6TMH8     | Ribosomal protein L19                                 | 21      | 2  | 24.7     | 11.44   | 0.0004  |
| 5.8204      | I1LJK0     | Uncharacterized protein                               | 52      | 3  | 7.9      | 6.60    | 0.0010  |
| 5.7755      | I1L3I1     | Lectin_legB domain-containing protein                 | 12      | 3  | 33.2     | 5.10    | 0.0002  |
| 5.6935      | C6TFF5     | Uncharacterized protein                               | 26      | 2  | 11.1     | 10.45   | 0.0184  |
| 5.6256      | A0A0R0K553 | Fe2OG dioxygenase domain-containing protein           | 38      | 8  | 34.8     | 5.58    | 0.0018  |
| 5.6147      | A0A0R0KF48 | Uncharacterized protein                               | 41      | 14 | 65.2     | 6.21    | 0.0000  |
| 5.4557      | A0A0R0IID0 | Uncharacterized protein                               | 31      | 4  | 24.0     | 6.02    | 0.0006  |
| 5.4388      | C6TMH1     | ZnMc domain-containing protein                        | 12      | 2  | 40.1     | 5.63    | 0.0012  |
| 5.4217      | C6TDV4     | LRRNT_2 domain-containing protein                     | 7       | 2  | 36.2     | 8.43    | 0.0001  |
| 5.2687      | I1KR99     | LRRNT_2 domain-containing protein                     | 16      | 3  | 37.4     | 7.91    | 0.0000  |
| 4.5604      | I1MQG3     | Uncharacterized protein                               | 28      | 3  | 22.2     | 5.21    | 0.0034  |
| 4.3185      | A0A0R0KXL5 | Uncharacterized protein                               | 23      | 2  | 13.6     | 8.18    | 0.0124  |
| 4.2159      | C6TC19     | Rhodanese domain-containing protein                   | 13      | 2  | 16.4     | 8.25    | 0.0006  |
| 4.0563      | I1LL87     | Uncharacterized protein                               | 18      | 2  | 19.3     | 4.96    | 0.0340  |
| 4.0260      | I1LT24     | DUF3700 domain-containing protein                     | 33      | 6  | 28.0     | 6.68    | 0.0000  |
| 3.9997      | C6TLA6     | DUF3700 domain-containing protein                     | 20      | 3  | 27.5     | 7.37    | 0.0045  |
| 3.8885      | I1JAL3     | Uncharacterized protein                               | 9       | 3  | 61.0     | 8.68    | 0.0065  |
| 3.7787      | I1MAE6     | PKS_ER domain-containing protein                      | 39      | 11 | 40.8     | 6.52    | 0.0000  |
| 3.7308      | C6T2R5     | RNase H domain-containing protein                     | 14      | 2  | 26.7     | 7.34    | 0.0001  |
| 3.6458      | I1MBS4     | Usp domain-containing protein                         | 27      | 3  | 18.0     | 9.41    | 0.0000  |
| 3.6182      | Q42447     | Maturation protein (Maturation-associated protein)    | 27      | 3  | 25.6     | 6.52    | 0.0001  |
| 3.4729      | I1JQU3     | AMP-binding domain-containing protein                 | 6       | 2  | 74.4     | 7.18    | 0.0010  |
| 3.4605      | I1JS15     | Uncharacterized protein                               | 5       | 3  | 116.8    | 6.58    | 0.0307  |
| 3.4392      | C6TCK6     | Uncharacterized protein                               | 13      | 2  | 25.8     | 6.86    | 0.0003  |
| 3.4120      | C6THW8     | DUF3700 domain-containing protein                     | 40      | 7  | 28.0     | 6.61    | 0.0002  |
| 3.3355      | I1JZK8     | t-SNARE coiled-coil homology protein                  | 10      | 2  | 33.3     | 7.14    | 0.0002  |
| 3.2705      | C6TN86     | Uncharacterized protein                               | 10      | 2  | 38.3     | 6.00    | 0.0000  |
| 3.1554      | A0A0R0FZI3 | AB hydrolase-1 domain-containing protein              | 9       | 2  | 33.6     | 6.54    | 0.0094  |
| 3.1463      | A0A0R0F3E0 | Histone H2A                                           | 21      | 2  | 15.5     | 10.71   | 0.0082  |
| 3.0952      | K7KSU9     | GYF domain-containing protein                         | 2       | 2  | 197.7    | 6.47    | 0.0040  |
| 3.0592      | I1LYM0     | DUF1681 domain-containing protein                     | 23      | 4  | 30.7     | 6.68    | 0.0016  |
| 3.0085      | C6TKX3     | Uncharacterized protein                               | 8       | 2  | 27.2     | 6.40    | 0.0245  |
| 2.9768      | I1MN40     | VWFA domain-containing protein                        | 15      | 3  | 42.4     | 4.73    | 0.0046  |
| 2.9512      | I1N846     | Uncharacterized protein                               | 27      | 11 | 83.9     | 6.73    | 0.0147  |
| 2.9493      | C6T229     | Uncharacterized protein                               | 32      | 2  | 8.0      | 8.84    | 0.0351  |
| 2.9102      | I1KFZ1     | Smg4_UPF3 domain-containing protein                   | 8       | 2  | 58.4     | 10.02   | 0.0157  |
| 2.8082      | I1KSE3     | ALOG domain-containing protein                        | 20      | 2  | 18.8     | 9.88    | 0.0056  |
| 2.7457      | A0A0R4J2I4 | Uncharacterized protein                               | 43      | 16 | 65.6     | 5.94    | 0.0003  |
| 2.7137      | I1MEX0     | MPN domain-containing protein                         | 57      | 8  | 34.6     | 6.71    | 0.0002  |
| 2.6910      | A0A024BT07 | Acyl-[acyl-carrier-protein] desaturase (EC 1.14.19.-) | 12      | 4  | 44.0     | 7.23    | 0.0011  |
| 2.6847      | C6TB96     | Uncharacterized protein                               | 22      | 5  | 35.2     | 5.49    | 0.0001  |
| 2.6403      | A0A0R4J364 | Uncharacterized protein                               | 67      | 16 | 40.9     | 6.40    | 0.0008  |
| 2.6399      | K7MEI2     | Exocyst subunit Exo70 family protein                  | 8       | 2  | 75.6     | 6.00    | 0.0331  |
| 2.6338      | K7LDT9     | Uncharacterized protei                                | 9       | 5  | 103.3    | 6.76    | 0.0002  |
| 2.5196      | K7MVZ6     | Glucose-6-phosphate isomerase (EC 5.3.1.9)            | 37      | 10 | 62.7     | 5.72    | 0.0002  |
| 2.5094      | K7MPT4     | TPR_REGION domain-containing protein                  | 6       | 2  | 59.8     | 7.37    | 0.0073  |

|        |            |                                                   |    |    |       |       |        |
|--------|------------|---------------------------------------------------|----|----|-------|-------|--------|
| 2.5032 | I1MEH8     | Uncharacterized protein                           | 41 | 6  | 22.2  | 7.20  | 0.0006 |
| 2.4515 | I1LC12     | SHSP domain-containing protein                    | 30 | 4  | 22.4  | 6.02  | 0.0166 |
| 2.4431 | K7MID0     | Uncharacterized protein                           | 8  | 4  | 96.9  | 6.39  | 0.0131 |
| 2.4406 | I1KQV7     | Uncharacterized protein                           | 38 | 19 | 72.5  | 6.04  | 0.0002 |
| 2.4194 | I1JCQ0     | Amino_oxidase domain-containing protein           | 11 | 4  | 60.8  | 6.90  | 0.0143 |
| 2.4079 | I1J6C3     | Arf-GAP domain-containing protein                 | 34 | 8  | 43.2  | 8.92  | 0.0001 |
| 2.3830 | I1K9P4     | ZF-HD dimerization-type domain-containing protein | 18 | 2  | 32.4  | 6.52  | 0.0016 |
| 2.3471 | I1MR73     | Uncharacterized protein                           | 4  | 2  | 58.0  | 8.90  | 0.0034 |
| 2.3384 | I1KJ00     | Uncharacterized protein                           | 14 | 3  | 28.2  | 5.43  | 0.0008 |
| 2.3279 | I1JK18     | Translocase of chloroplast (EC 3.6.5.-)           | 23 | 4  | 34.9  | 9.33  | 0.0138 |
| 2.2651 | I1NHI7     | VHS domain-containing protein                     | 6  | 7  | 222.6 | 7.78  | 0.0217 |
| 2.2449 | I1MCF0     | Uncharacterized protein                           | 23 | 5  | 45.2  | 6.43  | 0.0073 |
| 2.2247 | Q01527     | Maturation protein                                | 38 | 2  | 15.6  | 9.66  | 0.0188 |
| 2.2178 | K7MM61     | Uncharacterized protein                           | 3  | 5  | 256.7 | 6.20  | 0.0080 |
| 2.2098 | Q9ZTY1     | 35 kDa seed maturation protein                    | 10 | 2  | 35.3  | 6.32  | 0.0008 |
| 2.1948 | K7LLK0     | Uncharacterized protein                           | 19 | 9  | 88.2  | 5.15  | 0.0077 |
| 2.1941 | I1K9W9     | Uncharacterized protein                           | 14 | 2  | 34.7  | 8.54  | 0.0191 |
| 2.1798 | A0A0R0GIX5 | Nicotinamide-nucleotide adenyllyltransferase      | 15 | 2  | 31.7  | 6.73  | 0.0482 |
| 2.1691 | C6TME1     | Uncharacterized protein                           | 32 | 9  | 35.8  | 9.58  | 0.0000 |
| 2.1608 | I1KUE9     | WD_REPEATS_REGION domain-containing protein       | 10 | 2  | 38.8  | 8.22  | 0.0009 |
| 2.1588 | C6T063     | ANK_REP_REGION domain-containing protein          | 36 | 2  | 16.8  | 4.63  | 0.0088 |
| 2.1461 | I1MUP6     | Uncharacterized protein                           | 47 | 14 | 46.4  | 5.11  | 0.0001 |
| 2.1243 | I1JE40     | Uncharacterized protein                           | 35 | 16 | 68.9  | 7.36  | 0.0309 |
| 2.1204 | I1M138     | Peptidase A1 domain-containing protein            | 10 | 3  | 51.2  | 8.00  | 0.0248 |
| 2.1148 | A0A0R0ENW6 | Peptidase A1 domain-containing protein            | 35 | 8  | 46.3  | 8.53  | 0.0112 |
| 2.1095 | A0A0R0KSG7 | Ribosomal protein L19                             | 17 | 2  | 24.7  | 11.40 | 0.0309 |
| 2.0244 | K7MFQ7     | Uncharacterized protein                           | 15 | 6  | 68.8  | 8.50  | 0.0097 |
| 2.0101 | I1LF63     | Importin N-terminal domain-containing protein     | 30 | 14 | 99.4  | 5.05  | 0.0465 |
| 1.9453 | I1L3K7     | Uncharacterized protein                           | 64 | 17 | 48.0  | 6.29  | 0.0000 |
| 1.9446 | I1M7P3     | Uncharacterized protein                           | 34 | 2  | 14.7  | 4.93  | 0.0000 |
| 1.9380 | I1MV69     | Uncharacterized protein                           | 25 | 4  | 27.5  | 9.20  | 0.0005 |
| 1.9057 | A0A0R4J5T8 | Uncharacterized protein                           | 11 | 4  | 75.0  | 6.54  | 0.0047 |
| 1.8982 | A0A0R4J4L3 | Annexin                                           | 31 | 9  | 35.9  | 7.91  | 0.0250 |
| 1.8830 | Q9SEL0     | Seed maturation protein PM24                      | 20 | 3  | 26.8  | 5.33  | 0.0009 |
| 1.8620 | A0A0R0F259 | Uncharacterized protein                           | 41 | 14 | 65.2  | 6.21  | 0.0002 |
| 1.8617 | I1J8S7     | Uncharacterized protein                           | 46 | 7  | 29.3  | 6.73  | 0.0028 |
| 1.8551 | I1JPH6     | Lambda class glutathione S-transferase            | 50 | 7  | 26.8  | 6.01  | 0.0042 |
| 1.8475 | I1K301     | Uncharacterized protein                           | 59 | 7  | 14.8  | 5.71  | 0.0015 |
| 1.8379 | I1N627     | PHB domain-containing protein                     | 26 | 6  | 31.5  | 5.24  | 0.0022 |
| 1.8224 | A0A0R4J3N3 | SHSP domain-containing protein                    | 32 | 3  | 18.2  | 7.50  | 0.0341 |
| 1.8084 | I1M1V8     | Uncharacterized protein                           | 56 | 18 | 63.4  | 6.11  | 0.0001 |
| 1.8043 | I1NFP9     | PB1 domain-containing protein                     | 19 | 6  | 78.2  | 6.30  | 0.0124 |
| 1.8003 | K7KGC7     | Sucrose synthase (EC 2.4.1.13)                    | 41 | 31 | 92.2  | 6.13  | 0.0000 |
| 1.7961 | I1JU00     | SHSP domain-containing protein                    | 15 | 2  | 17.9  | 7.18  | 0.0007 |
| 1.7895 | C6TFW0     | Uncharacterized protein                           | 37 | 3  | 13.3  | 9.16  | 0.0003 |
| 1.7668 | I1N9W2     | WD_REPEATS_REGION domain-containing protein       | 5  | 2  | 70.5  | 6.64  | 0.0186 |
| 1.7668 | C6SVT0     | Usp domain-containing protein                     | 42 | 6  | 18.0  | 7.15  | 0.0001 |
| 1.7482 | K7LNG2     | NmrA domain-containing protein                    | 53 | 12 | 41.8  | 8.21  | 0.0005 |
| 1.7057 | A0A0R4J3M4 | Uncharacterized protein                           | 41 | 15 | 65.1  | 6.27  | 0.0004 |
| 1.7025 | K7MZJ0     | Sucrose synthase (EC 2.4.1.13)                    | 47 | 33 | 92.2  | 6.38  | 0.0001 |
| 1.6994 | C6SVM2     | Uncharacterized protein                           | 27 | 2  | 17.4  | 8.94  | 0.0004 |
| 1.6939 | I1MWJ3     | Uncharacterized protein                           | 19 | 2  | 19.0  | 9.48  | 0.0387 |
| 1.6896 | K7L1E9     | Fe2OG dioxygenase domain-containing protein       | 15 | 3  | 34.7  | 5.71  | 0.0100 |
| 1.6649 | P04670     | Uricase-2 isozyme 1                               | 46 | 12 | 35.1  | 7.97  | 0.0025 |
| 1.6635 | K7LKJ0     | HMA domain-containing protein                     | 48 | 3  | 8.6   | 6.60  | 0.0007 |
| 1.6528 | I1JSX4     | AAA domain-containing protein                     | 18 | 8  | 74.1  | 6.19  | 0.0077 |
| 1.6458 | C6TEY7     | Ubiquitin thioesterase (EC 3.4.19.12)             | 39 | 6  | 33.8  | 4.91  | 0.0281 |

|        |            |                                                           |    |    |       |       |        |
|--------|------------|-----------------------------------------------------------|----|----|-------|-------|--------|
| 1.6396 | I1K7R0     | Uncharacterized protein                                   | 27 | 3  | 16.1  | 5.35  | 0.0090 |
| 1.6056 | I1JFL5     | Inhibitor I9 domain-containing protein                    | 26 | 3  | 14.7  | 6.52  | 0.0007 |
| 1.5807 | I1K1B0     | Uncharacterized protein                                   | 13 | 2  | 34.2  | 5.02  | 0.0340 |
| 1.5761 | I1MX49     | Uncharacterized protein                                   | 22 | 6  | 46.0  | 6.35  | 0.0288 |
| 1.5517 | I1JFD2     | BSD domain-containing protein                             | 24 | 6  | 50.4  | 4.53  | 0.0175 |
| 1.5431 | I1K850     | Uncharacterized protein                                   | 15 | 5  | 82.5  | 8.88  | 0.0364 |
| 1.5203 | A0A0R0JD83 | Ligase_CoA domain-containing protein                      | 35 | 15 | 63.1  | 6.71  | 0.0349 |
| 1.5200 | I1LZK9     | Uncharacterized protein                                   | 17 | 5  | 65.4  | 6.87  | 0.0151 |
| 1.5094 | A0A0R0KL81 | Uncharacterized protein                                   | 7  | 3  | 80.9  | 7.14  | 0.0053 |
| 1.5066 | C6TEE9     | Uncharacterized protein                                   | 55 | 10 | 30.4  | 6.09  | 0.0003 |
| 1.5041 | A0A0R0GPZ3 | SHSP domain-containing protein                            | 16 | 2  | 17.6  | 5.97  | 0.0278 |
| 1.4953 | K7K3E3     | Uncharacterized protein                                   | 4  | 3  | 147.9 | 5.27  | 0.0145 |
| 1.4737 | K7KVD9     | Uncharacterized protein                                   | 4  | 2  | 73.5  | 6.42  | 0.0317 |
| 1.4380 | C6K8D1     | Seed biotinylated protein 68 kDa isoform                  | 23 | 9  | 67.9  | 6.58  | 0.0026 |
| 1.4303 | K7M5G4     | GYF domain-containing protein                             | 3  | 3  | 205.6 | 6.46  | 0.0053 |
| 1.4286 | I1JKK8     | SEC7 domain-containing protein                            | 9  | 11 | 198.7 | 5.66  | 0.0036 |
| 1.4266 | I1KKH2     | Importin N-terminal domain-containing protein             | 6  | 3  | 114.8 | 5.68  | 0.0014 |
| 1.4158 | I1NA37     | Uncharacterized protein                                   | 35 | 4  | 21.0  | 6.93  | 0.0173 |
| 1.4130 | I1MKC8     | Starch synthase, chloroplastic/amyloplastic (EC 2.4.1.-)  | 26 | 10 | 68.1  | 7.06  | 0.0001 |
| 1.4100 | K7L6T7     | Protein kinase domain-containing protein                  | 7  | 4  | 73.6  | 7.24  | 0.0168 |
| 1.4078 | A0A0R0JL19 | Uncharacterized protein                                   | 70 | 17 | 41.0  | 6.40  | 0.0002 |
| 1.4057 | I1MUR0     | UBX domain-containing protein                             | 20 | 8  | 65.5  | 4.73  | 0.0008 |
| 1.3947 | A0A0R4J4G9 | SHSP domain-containing protein                            | 22 | 3  | 23.7  | 6.98  | 0.0055 |
| 1.3736 | Q9SWB2     | Seed maturation protein PM41                              | 31 | 2  | 8.2   | 4.97  | 0.0470 |
| 1.3723 | M1FIS9     | Ribosomal protein S4                                      | 11 | 3  | 41.3  | 11.22 | 0.0038 |
| 1.3612 | I1KXF9     | Carbonic anhydrase                                        | 20 | 4  | 28.1  | 6.77  | 0.0258 |
| 1.3576 | C6TNN5     | ZnMc domain-containing protein                            | 29 | 7  | 43.4  | 6.10  | 0.0005 |
| 1.3452 | I1M7N8     | Uncharacterized protein                                   | 20 | 5  | 32.7  | 4.96  | 0.0085 |
| 1.3402 | I1KWD8     | Uncharacterized protein                                   | 36 | 7  | 49.8  | 5.27  | 0.0350 |
| 1.3386 | A1YZE0     | Starch synthase, chloroplastic/amyloplastic (EC 2.4.1.-)  | 24 | 9  | 68.0  | 7.06  | 0.0006 |
| 1.3218 | I1JPH2     | Uncharacterized protein                                   | 21 | 2  | 20.2  | 6.93  | 0.0274 |
| 1.3125 | I1L7V7     | Usp domain-containing protein                             | 30 | 2  | 17.2  | 7.87  | 0.0270 |
| 1.2985 | Q9S7N8     | Seed maturation protein PM21                              | 48 | 2  | 10.1  | 5.01  | 0.0012 |
| 1.2956 | A0A0R4J2Q1 | Peptidase A1 domain-containing protein                    | 27 | 8  | 46.4  | 8.34  | 0.0003 |
| 1.2867 | A0A0R0FSB9 | Uncharacterized protein                                   | 49 | 2  | 11.2  | 9.20  | 0.0416 |
| 1.2828 | K7K676     | AP-1 complex subunit gamma                                | 21 | 10 | 95.5  | 6.51  | 0.0069 |
| 1.2499 | K7KHI6     | Bifunctional dihydrofolate reductase-thymidylate synthase | 15 | 5  | 59.7  | 6.73  | 0.0292 |
| 1.2465 | I1J9W0     | 40S ribosomal protein S30                                 | 11 | 2  | 11.6  | 12.07 | 0.0002 |
| 1.2405 | C6T9H6     | Uncharacterized protein                                   | 26 | 5  | 42.3  | 7.56  | 0.0089 |
| 1.2388 | I1M2S7     | Lactamase_B domain-containing protein                     | 47 | 15 | 41.4  | 8.72  | 0.0016 |
| 1.2313 | A0A0R0EX12 | Histone H4                                                | 21 | 4  | 17.9  | 11.36 | 0.0043 |
| 1.2312 | I1NDA1     | Uncharacterized protein                                   | 25 | 4  | 31.8  | 6.18  | 0.0058 |
| 1.2263 | A0A0R0KE56 | Pectinesterase (EC 3.1.1.11)                              | 27 | 5  | 32.2  | 8.70  | 0.0258 |
| 1.2232 | Q9XER5     | Seed maturation protein PM22                              | 36 | 4  | 16.7  | 5.36  | 0.0022 |
| 1.2133 | I1L957     | Uncharacterized protein                                   | 33 | 11 | 48.8  | 6.42  | 0.0004 |
| 1.2116 | K7MIR3     | Enolase_C domain-containing protein                       | 67 | 15 | 38.3  | 6.80  | 0.0001 |
| 1.1965 | O23959     | Ca+2-binding EF hand protein                              | 23 | 4  | 27.0  | 6.44  | 0.0235 |
| 1.1741 | I1J7T0     | Pectinesterase (EC 3.1.1.11)                              | 20 | 7  | 56.5  | 9.01  | 0.0245 |
| 1.1706 | C6T1V2     | SHSP domain-containing protein                            | 46 | 4  | 17.7  | 6.81  | 0.0050 |
| 1.1700 | A0A0R0L186 | SHSP domain-containing protein                            | 18 | 3  | 17.3  | 7.42  | 0.0415 |
| 1.1558 | I1M3D5     | Arf-GAP domain-containing protein                         | 12 | 4  | 52.3  | 8.43  | 0.0028 |
| 1.1315 | I1LTF0     | Uncharacterized protein                                   | 14 | 3  | 51.8  | 8.78  | 0.0069 |
| 1.1297 | C6T1S9     | Uncharacterized protein                                   | 23 | 2  | 13.6  | 10.45 | 0.0049 |
| 1.1225 | I1J4D5     | Uncharacterized protein                                   | 41 | 6  | 26.6  | 5.90  | 0.0084 |
| 1.1164 | K7MFC0     | GYF domain-containing protein                             | 5  | 7  | 179.2 | 6.23  | 0.0025 |
| 1.1142 | A0A0R4J4X6 | SHSP domain-containing protein                            | 39 | 6  | 18.5  | 8.34  | 0.0103 |

|        |            |                                              |    |    |       |       |        |
|--------|------------|----------------------------------------------|----|----|-------|-------|--------|
| 1.1137 | K7LRE0     | Uncharacterized protein                      | 24 | 4  | 10.3  | 5.21  | 0.0039 |
| 1.0920 | I1KS18     | Uncharacterized protein                      | 25 | 4  | 25.3  | 6.52  | 0.0141 |
| 1.0914 | C6T3U6     | Ribosomal protein L19                        | 17 | 2  | 24.8  | 11.44 | 0.0019 |
| 1.0870 | A0A0R0H3L4 | Poly [ADP-ribose] polymerase                 | 40 | 21 | 91.6  | 5.59  | 0.0052 |
| 1.0746 | I1KG22     | Uncharacterized protein                      | 10 | 4  | 84.8  | 5.94  | 0.0031 |
| 1.0689 | I1K964     | Proteasome subunit beta (EC 3.4.25.1)        | 78 | 11 | 25.1  | 5.55  | 0.0321 |
| 1.0657 | A0A368UH41 | TOG domain-containing protein                | 14 | 9  | 118.8 | 6.76  | 0.0380 |
| 1.0544 | I1NEU8     | Aminotran_5 domain-containing protein        | 23 | 6  | 49.5  | 7.31  | 0.0055 |
| 1.0495 | K7L8B5     | Uncharacterized protein                      | 42 | 5  | 15.3  | 4.64  | 0.0000 |
| 1.0418 | I1JH91     | Uncharacterized protein                      | 5  | 2  | 92.3  | 6.65  | 0.0254 |
| 1.0313 | K7LM54     | Rab-GAP TBC domain-containing protein        | 15 | 8  | 93.2  | 4.83  | 0.0067 |
| 1.0219 | C6T244     | Uncharacterized protein                      | 30 | 2  | 14.0  | 5.17  | 0.0021 |
| 1.0211 | A0A0R0EXK4 | Uncharacterized protein                      | 15 | 7  | 70.7  | 8.37  | 0.0309 |
| 1.0086 | I1KY70     | Uncharacterized protein                      | 5  | 2  | 86.0  | 6.02  | 0.0009 |
| 1.0072 | I1MD29     | PHD-type domain-containing protein           | 15 | 2  | 28.1  | 4.84  | 0.0245 |
| 1.0057 | I1JLC8     | Protein SLE2                                 | 35 | 3  | 11.5  | 5.60  | 0.0098 |
| 1.0056 | I1KW96     | Uncharacterized protein                      | 3  | 2  | 117.1 | 8.57  | 0.0013 |
| 1.0027 | C6TK48     | Uncharacterized protein                      | 7  | 2  | 44.9  | 5.57  | 0.0100 |
| 0.9997 | I1KX25     | Arf-GAP domain-containing protein            | 47 | 11 | 43.4  | 8.92  | 0.0014 |
| 0.9960 | A0A0R0GA14 | SHSP domain-containing protein               | 30 | 4  | 17.9  | 7.50  | 0.0182 |
| 0.9947 | A0A0R0GZ36 | Uncharacterized protein                      | 48 | 9  | 41.3  | 5.99  | 0.0111 |
| 0.9919 | Q8RVH5     | Basic 7S globulin 2                          | 40 | 8  | 47.2  | 8.25  | 0.0085 |
| 0.9871 | Q9XET0     | Seed maturation protein PM30                 | 30 | 4  | 15.1  | 8.90  | 0.0255 |
| 0.9845 | I1KMW4     | TPR_REGION domain-containing protein         | 12 | 4  | 50.0  | 8.18  | 0.0002 |
| 0.9757 | I1MB74     | Uncharacterized protein                      | 4  | 2  | 92.0  | 6.64  | 0.0177 |
| 0.9685 | Q39873     | Lea protein                                  | 22 | 8  | 49.4  | 7.52  | 0.0015 |
| 0.9632 | C6T1E1     | t-SNARE coiled-coil homology protein         | 44 | 4  | 14.4  | 5.90  | 0.0046 |
| 0.9626 | I1JS10     | Uncharacterized protein                      | 86 | 2  | 6.8   | 8.92  | 0.0065 |
| 0.9605 | I1LN49     | Uncharacterized protein                      | 50 | 8  | 27.0  | 7.06  | 0.0001 |
| 0.9603 | C6SWV4     | Uncharacterized protein                      | 40 | 5  | 18.8  | 6.32  | 0.0109 |
| 0.9597 | I1K517     | Uncharacterized protein                      | 11 | 3  | 47.0  | 5.53  | 0.0043 |
| 0.9493 | K7KBB0     | Phi class glutathione S-transferase          | 39 | 6  | 24.8  | 6.30  | 0.0342 |
| 0.9468 | I1LKD9     | Protein transport protein Sec61 subunit beta | 41 | 4  | 10.9  | 11.65 | 0.0295 |
| 0.9417 | I1M0K3     | Cysteine proteinase inhibitor                | 50 | 9  | 27.7  | 7.08  | 0.0035 |
| 0.9391 | C6SVX0     | SHSP domain-containing protein               | 39 | 6  | 18.5  | 6.09  | 0.0114 |
| 0.9390 | A0A0R0G8Z2 | Cysteine proteinase inhibitor                | 13 | 2  | 22.5  | 5.30  | 0.0280 |
| 0.9329 | C6T374     | VOC domain-containing protein                | 61 | 4  | 15.4  | 5.69  | 0.0122 |
| 0.9323 | I1KJK0     | HABP4_PAI-RBP1 domain-containing protein     | 29 | 7  | 39.3  | 6.19  | 0.0444 |
| 0.9304 | I1LNT7     | Uncharacterized protein                      | 6  | 4  | 83.7  | 6.01  | 0.0146 |
| 0.9296 | K7MQM3     | C2 domain-containing protein                 | 26 | 8  | 46.5  | 4.67  | 0.0316 |
| 0.9288 | I1KCD7     | Uncharacterized protein                      | 40 | 26 | 90.9  | 5.24  | 0.0280 |
| 0.9206 | C6TFW8     | Uncharacterized protein                      | 18 | 3  | 25.9  | 7.30  | 0.0020 |
| 0.9172 | I1K0C8     | UBX domain-containing protein                | 26 | 9  | 65.7  | 4.73  | 0.0005 |
| 0.9158 | K7MXK9     | Hydrolase_4 domain-containing protein        | 13 | 4  | 77.3  | 7.94  | 0.0287 |
| 0.9120 | I1MKT8     | Glycosyltransferase (EC 2.4.1.-)             | 29 | 8  | 54.4  | 6.84  | 0.0011 |
| 0.9099 | I1J5P9     | Glycosyltransferase (EC 2.4.1.-)             | 28 | 8  | 56.1  | 5.88  | 0.0233 |
| 0.9045 | I1JEB4     | ANK_REP_REGION domain-containing protein     | 34 | 6  | 26.0  | 5.12  | 0.0116 |
| 0.9045 | I1K7F5     | MaoC-like domain-containing protein          | 13 | 3  | 34.1  | 8.53  | 0.0119 |
| 0.8992 | I1MX00     | Protein kinase domain-containing protein     | 9  | 4  | 75.5  | 6.42  | 0.0389 |
| 0.8971 | A0A0R4J387 | Chalcone-flavonone isomerase family protein  | 62 | 8  | 23.5  | 5.00  | 0.0022 |
| 0.8956 | I1NG02     | Thioredoxin domain-containing protein        | 31 | 4  | 24.4  | 5.57  | 0.0015 |
| 0.8923 | C6T9B1     | cobW domain-containing protein               | 53 | 9  | 31.4  | 6.48  | 0.0052 |
| 0.8918 | A0A0R0E8N5 | Uricase (EC 1.7.3.3) (Urate oxidase)         | 62 | 15 | 35.1  | 8.29  | 0.0002 |
| 0.8874 | I1KHE4     | TPR_REGION domain-containing protein         | 9  | 2  | 33.1  | 8.98  | 0.0011 |
| 0.8808 | A0A0R0ES33 | Uncharacterized protein                      | 32 | 6  | 37.2  | 6.65  | 0.0155 |
| 0.8805 | I1LR42     | Uncharacterized protein                      | 5  | 3  | 93.8  | 4.59  | 0.0090 |
| 0.8788 | Q39801     | 51 kDa seed maturation protein               | 25 | 10 | 51.0  | 7.11  | 0.0039 |

|        |            |                                                      |    |    |       |       |        |
|--------|------------|------------------------------------------------------|----|----|-------|-------|--------|
| 0.8691 | B3TDK6     | Lipoxygenase (EC 1.13.11.-)                          | 73 | 45 | 96.7  | 6.58  | 0.0008 |
| 0.8657 | K7MS29     | PPDK_N domain-containing protein                     | 22 | 20 | 164.0 | 6.77  | 0.0052 |
| 0.8656 | K7MR36     | Citrate synthase (EC 2.3.3.16)                       | 30 | 9  | 56.6  | 9.38  | 0.0332 |
| 0.8631 | C6SV68     | Cysteine proteinase inhibitor                        | 31 | 2  | 11.4  | 6.06  | 0.0130 |
| 0.8629 | C6SZK3     | Glutathione peroxidase                               | 44 | 5  | 18.4  | 7.09  | 0.0037 |
| 0.8626 | I1KGM8     | Uncharacterized protein                              | 5  | 2  | 66.3  | 7.64  | 0.0171 |
| 0.8625 | A0A0R0KRH5 | Uncharacterized protein                              | 12 | 3  | 44.7  | 4.82  | 0.0191 |
| 0.8574 | I1N5N0     | Pyruvate kinase (EC 2.7.1.40)                        | 55 | 19 | 55.2  | 7.56  | 0.0012 |
| 0.8532 | I1LDP2     | Uncharacterized protein                              | 16 | 4  | 27.9  | 8.92  | 0.0036 |
| 0.8471 | A0A0R4J3K7 | Epimerase domain-containing protein                  | 11 | 3  | 35.8  | 6.86  | 0.0153 |
| 0.8454 | A0A0R4J3X4 | SHSP domain-containing protein                       | 31 | 4  | 25.6  | 7.49  | 0.0204 |
| 0.8426 | Q8W198     | Phosphate transporter                                | 36 | 12 | 36.3  | 9.04  | 0.0012 |
| 0.8420 | C6T9B7     | Uncharacterized protein                              | 21 | 5  | 31.6  | 7.24  | 0.0012 |
| 0.8419 | C6SYZ8     | Uncharacterized protein                              | 23 | 5  | 23.6  | 10.32 | 0.0020 |
| 0.8390 | I1K7Z6     | VID27 domain-containing protein                      | 10 | 4  | 70.4  | 5.58  | 0.0118 |
| 0.8384 | C6SXR9     | Uncharacterized protein                              | 15 | 3  | 26.1  | 8.05  | 0.0332 |
| 0.8337 | K7KRK2     | Uncharacterized protein                              | 17 | 3  | 31.5  | 6.44  | 0.0448 |
| 0.8320 | I1LP93     | Phospholipid scramblase                              | 12 | 3  | 40.2  | 9.57  | 0.0160 |
| 0.8297 | A0A0R0EEE4 | HMA domain-containing protein                        | 32 | 3  | 13.6  | 7.72  | 0.0065 |
| 0.8213 | K7KP23     | Uncharacterized protein                              | 5  | 2  | 60.5  | 9.00  | 0.0073 |
| 0.8202 | I1MDA0     | Uncharacterized protein                              | 19 | 2  | 17.1  | 10.17 | 0.0005 |
| 0.8158 | I1KJM6     | Uncharacterized protein                              | 24 | 7  | 55.2  | 8.10  | 0.0048 |
| 0.8129 | I1JE17     | Glycosyltransferase (EC 2.4.1.-)                     | 50 | 13 | 53.1  | 5.86  | 0.0003 |
| 0.8107 | A0A0R0GAY5 | Peroxidase (EC 1.11.1.7)                             | 7  | 2  | 37.8  | 7.94  | 0.0103 |
| 0.8068 | C6SXY3     | Glutaredoxin domain-containing protein               | 17 | 2  | 18.1  | 6.32  | 0.0012 |
| 0.7970 | I1NDG9     | Uncharacterized protein                              | 9  | 2  | 43.1  | 5.95  | 0.0401 |
| 0.7962 | I1KZ41     | Glycosyltransferase (EC 2.4.1.-)                     | 21 | 5  | 54.3  | 6.74  | 0.0034 |
| 0.7957 | I1JV82     | TPR_REGION domain-containing protein                 | 32 | 4  | 24.1  | 8.70  | 0.0043 |
| 0.7956 | A0A0R0HTR7 | Uncharacterized protein                              | 6  | 3  | 76.9  | 8.28  | 0.0297 |
| 0.7940 | I1KYL4     | ER membrane protein complex subunit 3                | 26 | 5  | 27.8  | 8.97  | 0.0060 |
| 0.7900 | K7MHI8     | G-patch domain-containing protein                    | 7  | 3  | 98.7  | 5.74  | 0.0060 |
| 0.7898 | A0A0R0G0T0 | PfkB domain-containing protein                       | 33 | 9  | 37.9  | 5.63  | 0.0025 |
| 0.7846 | A0A0R0J624 | Uncharacterized protein                              | 10 | 2  | 27.2  | 10.08 | 0.0004 |
| 0.7830 | C6SXW1     | Peptide-methionine (R)-S-oxide reductase             | 41 | 3  | 15.1  | 6.74  | 0.0192 |
| 0.7823 | I1MYR9     | Uncharacterized protein                              | 24 | 3  | 20.0  | 10.36 | 0.0457 |
| 0.7813 | A0A0R0IVF1 | Uncharacterized protein                              | 23 | 7  | 48.0  | 8.22  | 0.0057 |
| 0.7760 | I1M307     | Bulb-type lectin domain-containing protein           | 19 | 7  | 48.8  | 6.64  | 0.0344 |
| 0.7746 | I1MBI9     | Peroxidase (EC 1.11.1.7)                             | 26 | 7  | 40.0  | 9.54  | 0.0224 |
| 0.7688 | I1MYV2     | SAP domain-containing protein                        | 14 | 6  | 78.0  | 4.74  | 0.0157 |
| 0.7646 | I1KEY3     | J domain-containing protein                          | 19 | 4  | 38.4  | 9.04  | 0.0173 |
| 0.7625 | C6SY82     | Eukaryotic translation initiation factor 5A (eIF-5A) | 22 | 3  | 17.3  | 6.20  | 0.0163 |
| 0.7588 | C6SW77     | Uncharacterized protein                              | 34 | 5  | 25.8  | 9.69  | 0.0378 |
| 0.7586 | I1L999     | Uncharacterized protein                              | 12 | 2  | 19.2  | 9.86  | 0.0494 |
| 0.7550 | I1L2S8     | Uncharacterized protein                              | 10 | 2  | 33.2  | 4.63  | 0.0001 |
| 0.7517 | I1K811     | Uncharacterized protein                              | 13 | 4  | 51.3  | 6.52  | 0.0310 |
| 0.7505 | K7MP42     | Ubiquitin-like domain-containing protein             | 14 | 9  | 98.7  | 5.43  | 0.0428 |
| 0.7488 | I1MMG2     | Uncharacterized protein                              | 20 | 5  | 40.8  | 5.92  | 0.0436 |
| 0.7465 | Q9LLQ6     | Seed maturation protein PM34                         | 71 | 17 | 31.7  | 7.08  | 0.0104 |
| 0.7454 | A0A0R0JRB0 | L-lactate dehydrogenase (EC 1.1.1.27)                | 51 | 10 | 37.8  | 7.02  | 0.0003 |
| 0.7383 | C6TD56     | Glyceraldehyde-3-phosphate dehydrogenase             | 69 | 17 | 37.0  | 7.47  | 0.0019 |
| 0.7377 | I1JSN6     | Usp domain-containing protein                        | 24 | 2  | 19.9  | 6.33  | 0.0023 |
| 0.7333 | I1LJN2     | Uncharacterized protein                              | 33 | 8  | 49.2  | 6.30  | 0.0004 |
| 0.7331 | I1NBW7     | Pescadillo homolog                                   | 8  | 2  | 69.2  | 8.84  | 0.0357 |
| 0.7329 | C6TN05     | Hypersensitive induced reaction protein 4            | 12 | 2  | 32.6  | 5.31  | 0.0055 |
| 0.7307 | I1JVB1     | Uncharacterized protein                              | 38 | 2  | 10.3  | 10.05 | 0.0007 |
| 0.7279 | I1KMB5     | Uncharacterized protein                              | 9  | 2  | 42.3  | 5.64  | 0.0192 |

|        |            |                                                                                             |    |    |       |       |        |
|--------|------------|---------------------------------------------------------------------------------------------|----|----|-------|-------|--------|
| 0.7263 | K7L479     | J domain-containing protein                                                                 | 8  | 4  | 103.3 | 6.55  | 0.0075 |
| 0.7253 | I1KDR0     | Uncharacterized protein                                                                     | 64 | 16 | 57.1  | 5.39  | 0.0058 |
| 0.7200 | C6T321     | Clat_adaptor_s domain-containing protein                                                    | 21 | 2  | 19.7  | 4.86  | 0.0153 |
| 0.7197 | C6TB70     | Thioredoxin domain-containing protein                                                       | 56 | 7  | 24.4  | 6.92  | 0.0023 |
| 0.7197 | A0A0R0EF73 | Uncharacterized protein                                                                     | 8  | 8  | 183.5 | 6.18  | 0.0209 |
| 0.7195 | I1JXA0     | Uncharacterized protein                                                                     | 54 | 33 | 90.8  | 5.24  | 0.0012 |
| 0.7187 | C6SWV3     | Uncharacterized protein                                                                     | 66 | 11 | 27.6  | 6.10  | 0.0007 |
| 0.7161 | B6ZJZ9     | Peroxisomal adenine nucleotide carrier 1 (GmPNC1)                                           | 15 | 3  | 34.7  | 9.69  | 0.0125 |
| 0.7153 | C6T9Z5     | Formate dehydrogenase                                                                       | 58 | 15 | 42.8  | 6.77  | 0.0143 |
| 0.7108 | I1KDI8     | MI domain-containing protein                                                                | 13 | 7  | 85.2  | 6.95  | 0.0145 |
| 0.7088 | A0A0R4J309 | Uncharacterized protein                                                                     | 37 | 5  | 18.6  | 10.51 | 0.0002 |
| 0.7074 | C6SVF6     | Glutaredoxin domain-containing protein                                                      | 90 | 7  | 11.3  | 6.52  | 0.0003 |
| 0.7053 | I1LD03     | Dolichyl-diphosphooligosaccharide--protein glycosyltransferase subunit 1                    | 29 | 9  | 52.7  | 7.31  | 0.0488 |
| 0.6991 | I1M8B3     | Uncharacterized protein                                                                     | 6  | 4  | 78.6  | 5.43  | 0.0423 |
| 0.6952 | C6TK30     | 60S ribosomal protein L36                                                                   | 23 | 2  | 12.4  | 11.31 | 0.0003 |
| 0.6950 | I1LP75     | AAA domain-containing protein                                                               | 7  | 4  | 68.4  | 9.29  | 0.0201 |
| 0.6908 | I1M3A7     | Uncharacterized protein                                                                     | 12 | 3  | 63.8  | 5.73  | 0.0044 |
| 0.6872 | C6T470     | Uncharacterized protein                                                                     | 16 | 2  | 27.2  | 4.81  | 0.0218 |
| 0.6868 | C6TFN8     | Uncharacterized protein                                                                     | 12 | 2  | 20.9  | 8.46  | 0.0108 |
| 0.6860 | I1LCQ1     | Pyruvate kinase (EC 2.7.1.40)                                                               | 36 | 14 | 57.8  | 7.36  | 0.0003 |
| 0.6852 | I1KQG0     | T-complex protein 1 subunit delta                                                           | 66 | 22 | 57.6  | 7.28  | 0.0318 |
| 0.6839 | I1NHP3     | Uncharacterized protein                                                                     | 25 | 2  | 15.6  | 9.09  | 0.0033 |
| 0.6829 | I1LTT3     | Uncharacterized protein                                                                     | 89 | 5  | 11.2  | 4.37  | 0.0066 |
| 0.6816 | C6SWA6     | Histone H2A                                                                                 | 46 | 4  | 15.7  | 10.67 | 0.0355 |
| 0.6799 | I1KSL3     | Uncharacterized protein                                                                     | 7  | 3  | 89.9  | 5.55  | 0.0126 |
| 0.6779 | I1K1V3     | Uncharacterized protein                                                                     | 16 | 2  | 17.3  | 5.30  | 0.0394 |
| 0.6764 | I1NBP5     | Glucose-6-phosphate 1-dehydrogenase (EC 1.1.1.49)                                           | 5  | 2  | 68.0  | 6.84  | 0.0043 |
| 0.6759 | K7MBG3     | Sucrose synthase (EC 2.4.1.13)                                                              | 27 | 17 | 91.5  | 6.24  | 0.0089 |
| 0.6756 | Q84ZV2     | Uncharacterized protein                                                                     | 33 | 2  | 11.3  | 9.13  | 0.0135 |
| 0.6745 | Q9MAZ9     | Nonclathrin coat protein zeta1-COP                                                          | 46 | 4  | 20.1  | 4.86  | 0.0061 |
| 0.6732 | I1MY42     | Uncharacterized protein                                                                     | 2  | 2  | 135.6 | 7.58  | 0.0403 |
| 0.6731 | A0A0R0HN41 | Uncharacterized protein                                                                     | 61 | 4  | 12.0  | 4.46  | 0.0085 |
| 0.6721 | I1M5H3     | Nuclear pore complex protein NUP35 (Nucleoporin 35)                                         | 21 | 3  | 36.2  | 9.23  | 0.0226 |
| 0.6705 | I1LOS5     | Uncharacterized protein                                                                     | 40 | 5  | 19.0  | 6.93  | 0.0115 |
| 0.6673 | C6SW70     | Uncharacterized protein                                                                     | 42 | 11 | 28.2  | 9.88  | 0.0420 |
| 0.6627 | I1NDE9     | Uncharacterized protein                                                                     | 24 | 8  | 54.4  | 4.73  | 0.0131 |
| 0.6602 | C6T4V0     | Uncharacterized protein                                                                     | 60 | 2  | 8.0   | 4.53  | 0.0187 |
| 0.6592 | I1J8U6     | AAA domain-containing protein                                                               | 8  | 3  | 70.3  | 8.10  | 0.0131 |
| 0.6578 | K7MNV4     | Uncharacterized protein                                                                     | 21 | 3  | 22.1  | 5.22  | 0.0007 |
| 0.6578 | I1M860     | TOG domain-containing protein                                                               | 16 | 4  | 37.8  | 5.31  | 0.0387 |
| 0.6563 | I1KVZ9     | Bet_v_1 domain-containing protein                                                           | 70 | 9  | 17.6  | 5.68  | 0.0139 |
| 0.6555 | I1MT10     | Uncharacterized protein                                                                     | 54 | 26 | 70.8  | 5.39  | 0.0015 |
| 0.6548 | I1JR04     | Tr-type G domain-containing protein                                                         | 6  | 3  | 77.1  | 8.19  | 0.0451 |
| 0.6502 | I1MUN3     | Nop domain-containing protein                                                               | 33 | 13 | 61.1  | 8.43  | 0.0075 |
| 0.6489 | A0A0R0I4F6 | Uncharacterized protein                                                                     | 56 | 15 | 31.8  | 7.36  | 0.0171 |
| 0.6483 | I1KQ89     | PMEI domain-containing protein                                                              | 23 | 3  | 22.8  | 5.57  | 0.0044 |
| 0.6469 | C6T588     | Bet_v_1 domain-containing protein                                                           | 61 | 7  | 16.8  | 4.88  | 0.0075 |
| 0.6319 | A0A0R0L1W4 | Glycosyltransferase (EC 2.4.1.-)                                                            | 16 | 5  | 56.7  | 6.58  | 0.0393 |
| 0.6317 | C6T2R8     | Uncharacterized protein                                                                     | 25 | 5  | 25.0  | 5.57  | 0.0027 |
| 0.6306 | K7KUE2     | Uncharacterized protein                                                                     | 20 | 7  | 83.7  | 4.98  | 0.0480 |
| 0.6299 | I1LD65     | Dihydrolipoamide acetyltransferase component of pyruvate dehydrogenase complex (EC 2.3.1.-) | 34 | 9  | 48.9  | 8.82  | 0.0434 |
| 0.6253 | I1JZL5     | Flavin-containing monooxygenase (EC 1.-.-.)                                                 | 35 | 9  | 52.2  | 5.63  | 0.0266 |
| 0.6227 | I1N8H9     | Uncharacterized protein                                                                     | 4  | 4  | 148.8 | 4.35  | 0.0340 |
| 0.6183 | I1LA46     | Uncharacterized protein                                                                     | 25 | 5  | 30.6  | 6.68  | 0.0026 |
| 0.6157 | I1N5S0     | Formate dehydrogenase                                                                       | 72 | 17 | 42.8  | 6.77  | 0.0008 |

|         |            |                                                      |    |    |       |      |        |
|---------|------------|------------------------------------------------------|----|----|-------|------|--------|
| 0.6154  | C6SVE0     | Eukaryotic translation initiation factor 5A (eIF-5A) | 30 | 4  | 17.4  | 5.76 | 0.0441 |
| 0.6142  | I1J7G5     | Uncharacterized protein                              | 47 | 5  | 18.6  | 5.02 | 0.0014 |
| 0.6084  | I1MRJ8     | Uncharacterized protein                              | 14 | 8  | 78.9  | 8.68 | 0.0127 |
| 0.6024  | C6TDW7     | Uncharacterized protein                              | 15 | 4  | 25.5  | 8.16 | 0.0003 |
| 0.6009  | I1M5Q4     | ADP,ATP carrier protein                              | 17 | 7  | 67.5  | 9.50 | 0.0436 |
| 0.6007  | C6SVD3     | Peptidylprolyl isomerase (EC 5.2.1.8)                | 23 | 2  | 12.0  | 6.01 | 0.0089 |
| 0.5988  | I1M595     | Uncharacterized protein                              | 17 | 2  | 19.8  | 9.50 | 0.0448 |
| 0.5983  | I1MMM3     | Uncharacterized protein                              | 30 | 4  | 23.3  | 7.11 | 0.0029 |
| 0.5970  | I1KRB3     | FAD-binding PCMH-type domain-containing protein      | 8  | 4  | 64.0  | 7.31 | 0.0201 |
| 0.5970  | I1MCM4     | RanBD1 domain-containing protein                     | 14 | 4  | 48.1  | 4.91 | 0.0287 |
| 0.5941  | A0A2Z6BYW7 | Glycosyltransferase                                  | 54 | 16 | 53.6  | 6.16 | 0.0018 |
| 0.5936  | I1L1F3     | Uncharacterized protein                              | 38 | 7  | 28.3  | 9.83 | 0.0053 |
| 0.5918  | I1M984     | AA_TRNA_LIGASE_II domain-containing protein          | 45 | 19 | 60.2  | 6.10 | 0.0189 |
| 0.5913  | I1LS05     | Uncharacterized protein                              | 34 | 7  | 45.8  | 7.02 | 0.0165 |
| 0.5901  | I1JQD8     | UBA domain-containing protein                        | 14 | 3  | 45.2  | 7.21 | 0.0289 |
| 0.5852  | K7KMOV4    | Uncharacterized protein                              | 2  | 2  | 124.2 | 5.91 | 0.0224 |
| -0.5872 | C6SYK2     | Uncharacterized protein                              | 38 | 5  | 22.4  | 5.07 | 0.0112 |
| -0.5894 | I1J940     | RPW8 domain-containing protein                       | 6  | 3  | 94.5  | 6.51 | 0.0337 |
| -0.5915 | A0A0R0J0J8 | Uncharacterized protein                              | 25 | 3  | 30.1  | 7.49 | 0.0041 |
| -0.5929 | I1LJE0     | Adenylyl cyclase-associated protein                  | 28 | 8  | 50.6  | 6.80 | 0.0326 |
| -0.5930 | A0A0R0KIF2 | Importin N-terminal domain-containing protein        | 35 | 16 | 86.6  | 4.75 | 0.0009 |
| -0.5931 | A0A368UHG2 | NAD(P)-bd_dom domain-containing protein              | 59 | 13 | 38.7  | 7.90 | 0.0168 |
| -0.5936 | I1L4U2     | Serine hydroxymethyltransferase (EC 2.1.2.1)         | 55 | 15 | 57.0  | 7.59 | 0.0498 |
| -0.5942 | I1JRY5     | Uncharacterized protein                              | 20 | 5  | 37.4  | 9.55 | 0.0220 |
| -0.5952 | I1JXR7     | Exostosin domain-containing protein                  | 12 | 3  | 47.1  | 6.65 | 0.0062 |
| -0.5961 | C6SVK3     | PITH domain-containing protein                       | 21 | 2  | 22.7  | 5.27 | 0.0301 |
| -0.5997 | C6T8I2     | Aminotran_1_2 domain-containing protein              | 38 | 11 | 43.6  | 5.77 | 0.0401 |
| -0.6004 | I1KJR7     | Uncharacterized protein                              | 17 | 3  | 28.4  | 4.86 | 0.0004 |
| -0.6006 | K7LW22     | Ubiquitin-like domain-containing protein             | 4  | 3  | 116.7 | 7.56 | 0.0176 |
| -0.6035 | I1JZM5     | Uncharacterized protein                              | 7  | 2  | 51.5  | 6.76 | 0.0103 |
| -0.6043 | C6SW65     | Uncharacterized protein                              | 24 | 3  | 20.1  | 8.70 | 0.0233 |
| -0.6054 | I1NBW2     | Serine/threonine-protein phosphatase (EC 3.1.3.16)   | 32 | 7  | 42.7  | 7.78 | 0.0274 |
| -0.6078 | I1KP26     | Mg-por_mtran_C domain-containing protein             | 11 | 3  | 35.2  | 7.44 | 0.0249 |
| -0.6083 | Q2PMU2     | Photosystem I P700 chlorophyll a apoprotein A2       | 19 | 9  | 82.4  | 7.31 | 0.0380 |
| -0.6086 | K7M8I6     | Uncharacterized protein                              | 6  | 3  | 60.9  | 6.55 | 0.0382 |
| -0.6088 | C6TJL7     | Xyloglucan endotransglucosylase/hydrolase            | 21 | 4  | 34.2  | 8.21 | 0.0251 |
| -0.6101 | C6SY33     | Uncharacterized protein                              | 11 | 2  | 25.9  | 8.51 | 0.0006 |
| -0.6114 | C6THB9     | Uncharacterized protein                              | 43 | 12 | 45.6  | 6.35 | 0.0069 |
| -0.6119 | I1JJV5     | Protein kinase domain-containing protein             | 28 | 9  | 57.9  | 6.18 | 0.0467 |
| -0.6159 | Q8S5C1     | 4-coumarate:CoA ligase isoenzyme 2 (EC 6.2.1.12)     | 27 | 11 | 60.1  | 6.74 | 0.0262 |
| -0.6159 | C6TMK2     | Uncharacterized protein                              | 17 | 3  | 31.9  | 9.26 | 0.0034 |
| -0.6181 | A0A0R0KVT1 | Uncharacterized protein                              | 39 | 5  | 26.1  | 5.80 | 0.0046 |
| -0.6184 | A0A0R0JQA9 | X8 domain-containing protein                         | 19 | 2  | 21.5  | 7.24 | 0.0270 |
| -0.6214 | A0A0R4J3N6 | Uncharacterized protein                              | 6  | 2  | 41.3  | 5.34 | 0.0042 |
| -0.6229 | I1L5K6     | Carboxypeptidase (EC 3.4.16.-)                       | 22 | 6  | 55.6  | 6.71 | 0.0027 |
| -0.6237 | I1KZI6     | ENTH domain-containing protein                       | 7  | 3  | 98.5  | 5.87 | 0.0294 |
| -0.6251 | I1K5J8     | Uncharacterized protein                              | 26 | 10 | 69.3  | 7.87 | 0.0103 |
| -0.6269 | I1K380     | Uncharacterized protein                              | 13 | 3  | 40.2  | 7.24 | 0.0291 |
| -0.6275 | I1L295     | Uncharacterized protein                              | 4  | 2  | 60.1  | 6.64 | 0.0326 |
| -0.6289 | I1JST6     | RING-type E3 ubiquitin transferase (EC 2.3.2.27)     | 10 | 5  | 89.2  | 5.31 | 0.0016 |
| -0.6291 | Q1WCP1     | Cytochrome P450 monooxygenase CYP94D24               | 6  | 2  | 39.3  | 9.22 | 0.0289 |
| -0.6316 | C6TL49     | Protein kinase domain-containing protein             | 13 | 4  | 33.9  | 8.13 | 0.0061 |
| -0.6329 | I1K6N8     | ThiF domain-containing protein                       | 17 | 3  | 36.8  | 5.86 | 0.0031 |
| -0.6338 | C6TNQ1     | Fe2OG dioxygenase domain-containing protein          | 41 | 8  | 34.9  | 5.31 | 0.0038 |
| -0.6341 | I1M9P8     | X8 domain-containing protein                         | 12 | 3  | 53.0  | 6.77 | 0.0061 |
| -0.6361 | I1LST9     | Uncharacterized protein                              | 9  | 4  | 66.7  | 6.29 | 0.0035 |
| -0.6368 | A0A0R0H975 | Apocytochr_F_N domain-containing protein             | 34 | 7  | 35.3  | 8.82 | 0.0072 |

|         |            |                                                     |    |    |       |       |        |
|---------|------------|-----------------------------------------------------|----|----|-------|-------|--------|
| -0.6415 | A0A0R0GFB2 | Uncharacterized protein                             | 54 | 18 | 57.5  | 8.87  | 0.0016 |
| -0.6458 | C6SVL3     | Phycocyanin domain-containing protein               | 16 | 2  | 19.3  | 6.93  | 0.0003 |
| -0.6470 | I1L5G4     | Amidophosphoribosyltransferase amidotransferase     | 27 | 11 | 62.0  | 6.84  | 0.0017 |
| -0.6485 | I1KM16     | Uncharacterized protein                             | 64 | 13 | 28.1  | 5.68  | 0.0128 |
| -0.6500 | C6T8H5     | Tubulin gamma chain                                 | 11 | 3  | 53.1  | 5.94  | 0.0097 |
| -0.6515 | I1MVC1     | Uncharacterized protein                             | 41 | 15 | 69.4  | 8.35  | 0.0022 |
| -0.6529 | A0A0R0EQE5 | Uncharacterized protein                             | 33 | 16 | 70.3  | 6.04  | 0.0027 |
| -0.6549 | I1JR44     | Uncharacterized protein                             | 20 | 3  | 18.6  | 6.80  | 0.0394 |
| -0.6550 | I1J4T0     | t-SNARE coiled-coil homology protein                | 12 | 2  | 30.1  | 6.10  | 0.0371 |
| -0.6551 | I1MVN5     | Peroxidase (EC 1.11.1.7)                            | 66 | 13 | 35.5  | 9.00  | 0.0128 |
| -0.6574 | C6TL29     | Phosphoribulokinase (EC 2.7.1.19)                   | 23 | 6  | 45.3  | 6.28  | 0.0139 |
| -0.6593 | C6T2H1     | Flavodoxin-like domain-containing protein           | 57 | 8  | 21.7  | 6.95  | 0.0235 |
| -0.6602 | I1LI96     | Phosphoserine aminotransferase (EC 2.6.1.52)        | 32 | 10 | 45.0  | 7.94  | 0.0096 |
| -0.6607 | A0A0R4J307 | Uncharacterized protein                             | 17 | 3  | 25.4  | 6.51  | 0.0141 |
| -0.6639 | I1L367     | Uncharacterized protein                             | 46 | 12 | 55.7  | 6.34  | 0.0331 |
| -0.6653 | I1J547     | Aminotran_1_2 domain-containing protein             | 35 | 11 | 53.5  | 5.69  | 0.0012 |
| -0.6654 | C6T2V7     | Phycocyanin domain-containing protein               | 18 | 2  | 26.1  | 4.87  | 0.0368 |
| -0.6710 | I1KUQ6     | Lipoxygenase (EC 1.13.11.-)                         | 26 | 15 | 97.1  | 7.40  | 0.0223 |
| -0.6711 | I1MU50     | ENTH domain-containing protein                      | 16 | 4  | 60.8  | 6.29  | 0.0121 |
| -0.6733 | I1K7Q8     | NmrA domain-containing protein                      | 60 | 12 | 34.2  | 6.06  | 0.0277 |
| -0.6758 | I1LQ56     | Flavodoxin-like domain-containing protein           | 26 | 5  | 27.1  | 5.99  | 0.0176 |
| -0.6763 | A0A0R0LB64 | Uncharacterized protein                             | 44 | 10 | 34.2  | 9.29  | 0.0308 |
| -0.6769 | I1JL58     | PRA1 family protein                                 | 11 | 2  | 24.2  | 8.19  | 0.0352 |
| -0.6774 | I1LRA7     | Carboxypeptidase (EC 3.4.16.-)                      | 28 | 7  | 51.0  | 5.52  | 0.0159 |
| -0.6789 | I1K498     | Ferredoxin                                          | 29 | 3  | 15.8  | 4.55  | 0.0376 |
| -0.6791 | I1LU10     | Uncharacterized protein                             | 46 | 13 | 46.3  | 6.30  | 0.0018 |
| -0.6800 | A0A0R0KVX2 | Fe2OG dioxygenase domain-containing protein         | 15 | 3  | 39.7  | 6.84  | 0.0162 |
| -0.6806 | K7K5P1     | J domain-containing protein                         | 31 | 5  | 27.1  | 5.50  | 0.0010 |
| -0.6824 | A0A368UKJ9 | Pyruvate kinase (EC 2.7.1.40)                       | 34 | 12 | 63.3  | 7.59  | 0.0299 |
| -0.6848 | I1MUR9     | GMC_OxRdtase_N domain-containing protein            | 6  | 3  | 62.9  | 6.84  | 0.0212 |
| -0.6848 | K7MMN7     | FAD-binding PCMH-type domain-containing protein     | 7  | 4  | 66.1  | 8.07  | 0.0023 |
| -0.6892 | I1J4P0     | TFIIS N-terminal domain-containing protein          | 5  | 2  | 57.6  | 5.38  | 0.0135 |
| -0.6894 | I1K5M5     | AP-3 complex subunit delta                          | 4  | 3  | 108.7 | 6.42  | 0.0047 |
| -0.6902 | A0A0R0HC62 | Uncharacterized protein                             | 13 | 2  | 20.4  | 8.43  | 0.0037 |
| -0.6944 | I1JJP2     | Glucose-1-phosphate adenylyltransferase             | 35 | 11 | 56.3  | 6.74  | 0.0228 |
| -0.6945 | A0A0R4J5R0 | Fe2OG dioxygenase domain-containing protein         | 19 | 4  | 37.0  | 5.88  | 0.0015 |
| -0.6966 | I1MR46     | Uncharacterized protein                             | 23 | 8  | 62.0  | 9.41  | 0.0447 |
| -0.7031 | I1K4M6     | C2 domain-containing protein                        | 28 | 36 | 229.2 | 5.36  | 0.0470 |
| -0.7036 | A0A0R0KAJ9 | Uncharacterized protein                             | 6  | 3  | 58.8  | 6.96  | 0.0197 |
| -0.7124 | I1JGA0     | Calcium-transporting ATPase (EC 7.2.2.10)           | 16 | 10 | 113.9 | 6.11  | 0.0000 |
| -0.7137 | I1K675     | TPR_REGION domain-containing protein                | 16 | 7  | 61.5  | 5.40  | 0.0226 |
| -0.7182 | C6ZS11     | Leucine-rich repeat resistance protein-like protein | 12 | 3  | 37.1  | 8.38  | 0.0368 |
| -0.7242 | K7MKC7     | SRP54 domain-containing protein                     | 14 | 5  | 68.7  | 8.18  | 0.0000 |
| -0.7244 | A0A0R0ESN9 | Uncharacterized protein                             | 26 | 10 | 76.4  | 5.07  | 0.0042 |
| -0.7263 | I1LCX7     | RING-type E3 ubiquitin transferase (EC 2.3.2.27)    | 4  | 2  | 68.7  | 6.05  | 0.0016 |
| -0.7311 | I1JQZ6     | Pept_C1 domain-containing protein                   | 27 | 6  | 39.7  | 6.27  | 0.0043 |
| -0.7320 | A0A0R0HNL5 | NAB domain-containing protein                       | 2  | 4  | 251.2 | 4.97  | 0.0040 |
| -0.7335 | I1L2T0     | SGL domain-containing protein                       | 10 | 2  | 41.3  | 6.46  | 0.0076 |
| -0.7417 | I1JJW5     | Uncharacterized protein                             | 13 | 4  | 61.5  | 5.83  | 0.0036 |
| -0.7419 | I1M5C1     | LEA_2 domain-containing protein                     | 12 | 2  | 27.8  | 10.23 | 0.0062 |
| -0.7501 | Q9ZNNZ5    | Peroxidase (EC 1.11.1.7) (Fragment)                 | 36 | 8  | 38.5  | 8.13  | 0.0314 |
| -0.7505 | I1LSM1     | Phycocyanin domain-containing protein               | 20 | 3  | 22.8  | 6.92  | 0.0040 |
| -0.7508 | A0A1V0PL25 | Argonaute 5                                         | 8  | 4  | 103.3 | 9.57  | 0.0278 |
| -0.7510 | I1LWX5     | Uncharacterized protein                             | 21 | 6  | 54.2  | 7.42  | 0.0196 |
| -0.7512 | I1LFX6     | Uncharacterized protein                             | 20 | 11 | 96.9  | 4.89  | 0.0232 |
| -0.7530 | A0A0R0GAK0 | Uncharacterized protein                             | 48 | 10 | 30.6  | 8.40  | 0.0007 |
| -0.7564 | I1M6B9     | Neutral ceramidase (EC 3.5.1.23)                    | 28 | 13 | 84.5  | 7.24  | 0.0004 |

|         |            |                                                   |    |    |       |      |        |
|---------|------------|---------------------------------------------------|----|----|-------|------|--------|
| -0.7575 | I1KMS7     | SMK-1 domain-containing protein                   | 7  | 4  | 100.0 | 5.39 | 0.0002 |
| -0.7583 | C6T7J2     | Uncharacterized protein                           | 12 | 3  | 25.1  | 9.01 | 0.0018 |
| -0.7624 | I1M712     | Oxygen-evolving enhancer protein 2                | 31 | 4  | 28.6  | 7.87 | 0.0067 |
| -0.7648 | A0A0R0LAT1 | Protein kinase domain-containing protein          | 10 | 5  | 66.4  | 7.50 | 0.0223 |
| -0.7653 | K7MU41     | Uncharacterized protein                           | 26 | 10 | 66.9  | 8.53 | 0.0000 |
| -0.7671 | K7MYB6     | HP domain-containing protein                      | 33 | 21 | 108.4 | 5.71 | 0.0031 |
| -0.7693 | K7ML47     | Phytoeyanin domain-containing protein             | 17 | 2  | 25.3  | 9.72 | 0.0466 |
| -0.7737 | I1N1F9     | Aldedh domain-containing protein                  | 56 | 18 | 58.3  | 7.15 | 0.0006 |
| -0.7737 | A0A0R0JCW2 | Uncharacterized protein                           | 26 | 7  | 66.2  | 6.29 | 0.0308 |
| -0.7740 | A0A0R0HXE9 | Uncharacterized protein                           | 12 | 2  | 18.7  | 9.99 | 0.0206 |
| -0.7764 | I1JSJ3     | Fructose-bisphosphate aldolase (EC 4.1.2.13)      | 30 | 8  | 42.5  | 6.79 | 0.0334 |
| -0.7793 | I1KJQ4     | Reticulon-like protein                            | 9  | 3  | 62.4  | 8.41 | 0.0209 |
| -0.7800 | A0A0R0LI21 | Uncharacterized protein                           | 2  | 2  | 232.4 | 5.64 | 0.0444 |
| -0.7801 | I1JB9      | Endoglucanase (EC 3.2.1.4)                        | 8  | 2  | 56.6  | 9.22 | 0.0053 |
| -0.7834 | C6TK14     | FBPase domain-containing protein                  | 10 | 3  | 41.7  | 6.43 | 0.0482 |
| -0.7836 | I1KHK4     | Protein kinase domain-containing protein          | 11 | 4  | 77.5  | 6.20 | 0.0083 |
| -0.7843 | C6TDP2     | Uncharacterized protein                           | 30 | 8  | 30.1  | 7.93 | 0.0010 |
| -0.7881 | C6TKD0     | Fe2OG dioxygenase domain-containing protein       | 18 | 2  | 40.9  | 6.37 | 0.0033 |
| -0.7917 | A0A0R4J4D2 | PKS_ER domain-containing protein                  | 56 | 13 | 39.1  | 5.95 | 0.0012 |
| -0.7952 | K7MK51     | Uncharacterized protein                           | 7  | 4  | 87.6  | 6.98 | 0.0306 |
| -0.7974 | I1MRL3     | TPR_REGION domain-containing protein              | 7  | 2  | 45.4  | 7.28 | 0.0278 |
| -0.7980 | I1L327     | DUF862 domain-containing protein                  | 19 | 3  | 27.2  | 7.34 | 0.0489 |
| -0.7995 | I1MJG6     | Uncharacterized protein                           | 12 | 14 | 180.4 | 7.55 | 0.0154 |
| -0.7999 | A0A0R0JPA1 | Beta-galactosidase (EC 3.2.1.23)                  | 26 | 13 | 94.0  | 7.53 | 0.0011 |
| -0.7999 | K7L6W0     | LRRNT_2 domain-containing protein                 | 12 | 3  | 37.9  | 5.81 | 0.0019 |
| -0.8025 | K7MR59     | NAD(P)-bd_dom domain-containing protein           | 26 | 8  | 74.3  | 6.67 | 0.0263 |
| -0.8032 | I1NHN6     | Uncharacterized protein                           | 10 | 3  | 66.2  | 8.91 | 0.0061 |
| -0.8055 | K7MCL5     | Flavin-containing monooxygenase                   | 14 | 4  | 59.3  | 7.83 | 0.0015 |
| -0.8071 | I1KW78     | Uncharacterized protein                           | 23 | 8  | 60.8  | 9.16 | 0.0079 |
| -0.8089 | K7LKM1     | Peptidase_M28 domain-containing protein           | 10 | 5  | 99.7  | 7.62 | 0.0154 |
| -0.8102 | C6TNJ3     | S-adenosylmethionine synthase (EC 2.5.1.6)        | 63 | 13 | 42.9  | 6.14 | 0.0094 |
| -0.8108 | K7LEA7     | RING-type domain-containing protein               | 23 | 5  | 39.1  | 4.60 | 0.0024 |
| -0.8143 | A0A0R0IM08 | Uncharacterized protein                           | 34 | 5  | 30.9  | 8.41 | 0.0426 |
| -0.8148 | I1MGZ2     | Plasma membrane ATPase (EC 7.1.2.1)               | 40 | 29 | 105.0 | 6.81 | 0.0037 |
| -0.8163 | A0A0R0FLF0 | Xyloglucan endotransglucosylase/hydrolase         | 25 | 8  | 40.4  | 9.25 | 0.0048 |
| -0.8182 | I1LCP7     | Protein kinase domain-containing protein          | 7  | 2  | 54.8  | 7.21 | 0.0165 |
| -0.8186 | C6TGB8     | Uncharacterized protein                           | 36 | 10 | 46.2  | 6.10 | 0.0038 |
| -0.8233 | C6TBY6     | V-type proton ATPase proteolipid subunit          | 29 | 2  | 16.5  | 8.46 | 0.0002 |
| -0.8245 | C6TI82     | Methyltransferase (EC 2.1.1.-)                    | 33 | 9  | 38.5  | 6.65 | 0.0301 |
| -0.8311 | K7LXR3     | Uncharacterized protein                           | 6  | 2  | 83.1  | 6.95 | 0.0018 |
| -0.8327 | I1LIV5     | FAD-binding PCMH-type domain-containing protein   | 47 | 19 | 66.0  | 8.21 | 0.0011 |
| -0.8340 | I1L2C2     | Transmembrane 9 superfamily member                | 21 | 10 | 74.9  | 6.18 | 0.0010 |
| -0.8364 | K7KQQ0     | Uncharacterized protein                           | 13 | 2  | 30.8  | 7.28 | 0.0191 |
| -0.8402 | I1N842     | Xyloglucan endotransglucosylase/hydrolase         | 28 | 7  | 34.1  | 7.71 | 0.0195 |
| -0.8403 | I1JM18     | Transket_pyr domain-containing protein            | 41 | 7  | 39.0  | 6.54 | 0.0006 |
| -0.8404 | C6T225     | Uncharacterized protein                           | 24 | 4  | 22.2  | 5.00 | 0.0002 |
| -0.8405 | I1LP66     | Uncharacterized protein                           | 17 | 9  | 96.7  | 4.82 | 0.0197 |
| -0.8411 | I1L4V4     | Fn3_like domain-containing protein                | 24 | 12 | 85.1  | 5.71 | 0.0216 |
| -0.8423 | K7N544     | CMP/dCMP-type deaminase domain-containing protein | 26 | 3  | 20.6  | 5.16 | 0.0113 |
| -0.8451 | K7L413     | Hexosyltransferase (EC 2.4.1.-)                   | 6  | 3  | 75.9  | 8.92 | 0.0189 |
| -0.8469 | A0A0R0JYS9 | Peroxidase (EC 1.11.1.7)                          | 60 | 12 | 35.5  | 8.76 | 0.0177 |
| -0.8629 | K7MNN1     | Aminotran_1_2 domain-containing protein           | 12 | 3  | 52.8  | 7.94 | 0.0077 |
| -0.8647 | I1JSR9     | MFS domain-containing protein                     | 12 | 5  | 78.7  | 5.72 | 0.0012 |
| -0.8689 | C6TEX7     | Uncharacterized protein                           | 16 | 3  | 28.9  | 5.96 | 0.0000 |
| -0.8698 | I1K4S4     | Uncharacterized protein                           | 17 | 3  | 35.2  | 9.54 | 0.0260 |
| -0.8710 | I1KFE9     | Uncharacterized protein                           | 30 | 9  | 60.1  | 7.77 | 0.0022 |
| -0.8765 | C6T3D7     | G protein gamma domain-containing protein         | 35 | 3  | 16.0  | 5.71 | 0.0258 |

|         |            |                                                 |    |    |       |       |        |
|---------|------------|-------------------------------------------------|----|----|-------|-------|--------|
| -0.8786 | C6TNE6     | Chlorophyll a-b binding protein, chloroplastic  | 53 | 6  | 27.9  | 5.43  | 0.0203 |
| -0.8810 | I1K0L4     | Uncharacterized protein                         | 34 | 15 | 71.7  | 6.00  | 0.0055 |
| -0.8837 | C6TFS5     | Cytochrome b6-f complex iron-sulfur subunit     | 32 | 5  | 28.4  | 8.79  | 0.0111 |
| -0.8865 | K7KKK3     | Uncharacterized protein                         | 18 | 4  | 61.0  | 7.44  | 0.0053 |
| -0.8872 | I1L776     | Uncharacterized protein                         | 35 | 6  | 39.9  | 5.29  | 0.0127 |
| -0.8879 | Q06765     | ADR6 protein (Sali5-4a protein)                 | 52 | 8  | 30.4  | 6.84  | 0.0039 |
| -0.8880 | B0FPA3     | Extracellular Ca <sup>2+</sup> sensing receptor | 10 | 2  | 41.9  | 9.39  | 0.0269 |
| -0.8895 | A0A0R4J3B7 | Lipase_GDSL domain-containing protein           | 23 | 4  | 39.7  | 4.84  | 0.0171 |
| -0.8914 | K7LD67     | Uncharacterized protein                         | 67 | 18 | 41.7  | 5.49  | 0.0072 |
| -0.8921 | A0A0R0IIS3 | Cas1_AcylT domain-containing protein            | 4  | 2  | 67.1  | 8.81  | 0.0004 |
| -0.8924 | A0A368ULH0 | Kinesin-like protein                            | 3  | 2  | 98.3  | 7.40  | 0.0449 |
| -0.8937 | A0A0R0JYY8 | Tubulin beta chain                              | 55 | 22 | 49.9  | 5.01  | 0.0050 |
| -0.8966 | I1M4U9     | NAD(P)-bd_dom domain-containing protein         | 51 | 11 | 39.1  | 8.13  | 0.0295 |
| -0.8982 | I1JY06     | Uncharacterized protein                         | 33 | 17 | 91.7  | 5.31  | 0.0003 |
| -0.9041 | I1KIJ3     | Uncharacterized protein                         | 3  | 2  | 117.3 | 7.12  | 0.0088 |
| -0.9073 | I1JHV7     | Uncharacterized protein                         | 10 | 2  | 29.7  | 7.64  | 0.0003 |
| -0.9107 | A0A0R4J3V9 | Flavodoxin-like domain-containing protein       | 46 | 6  | 21.7  | 6.54  | 0.0037 |
| -0.9119 | I1L340     | C2 domain-containing protein                    | 15 | 3  | 30.3  | 5.03  | 0.0046 |
| -0.9144 | K7M429     | Uncharacterized protein                         | 30 | 10 | 45.6  | 6.28  | 0.0020 |
| -0.9218 | A0A0R4J339 | Uncharacterized protein                         | 18 | 6  | 82.3  | 8.54  | 0.0079 |
| -0.9234 | Q6RUF9     | Proline dehydrogenase (EC 1.5.5.2)              | 9  | 3  | 54.4  | 8.13  | 0.0047 |
| -0.9283 | I1KPM9     | TPR_REGION domain-containing protein            | 17 | 8  | 63.2  | 5.41  | 0.0023 |
| -0.9291 | I1L8N6     | Uncharacterized protein                         | 8  | 2  | 50.0  | 5.78  | 0.0064 |
| -0.9332 | I1KTW4     | ALA-interacting subunit                         | 9  | 2  | 38.5  | 9.54  | 0.0084 |
| -0.9357 | A0A0R0K666 | Peptidase A1 domain-containing protein          | 45 | 9  | 47.0  | 8.12  | 0.0207 |
| -0.9398 | I1MC85     | Uncharacterized protein                         | 32 | 10 | 45.8  | 5.82  | 0.0006 |
| -0.9409 | G0T437     | Purple acid phosphatase (EC 3.1.3.2)            | 17 | 7  | 74.1  | 6.35  | 0.0013 |
| -0.9512 | C6TH50     | Xyloglucan endotransglucosylase/hydrolase       | 22 | 5  | 35.0  | 5.01  | 0.0015 |
| -0.9561 | I1KN20     | Uncharacterized protein                         | 6  | 2  | 54.8  | 5.15  | 0.0261 |
| -0.9630 | I1JG92     | Uncharacterized protein                         | 12 | 5  | 86.3  | 6.23  | 0.0102 |
| -0.9636 | I1LLM2     | Asparagine synthetase                           | 51 | 19 | 65.2  | 6.64  | 0.0019 |
| -0.9657 | C6T487     | Uncharacterized protein                         | 19 | 3  | 19.8  | 7.09  | 0.0205 |
| -0.9680 | I1MYV1     | C2 domain-containing protein                    | 32 | 41 | 228.5 | 5.50  | 0.0270 |
| -0.9697 | I1MDX7     | Uncharacterized protein                         | 14 | 3  | 31.9  | 8.15  | 0.0123 |
| -0.9706 | I1JTX2     | Uncharacterized protein                         | 16 | 3  | 28.2  | 9.83  | 0.0001 |
| -0.9720 | I1L6Y8     | Protein kinase domain-containing protein        | 21 | 11 | 98.0  | 6.01  | 0.0006 |
| -0.9723 | I1KBK8     | Uncharacterized protein                         | 23 | 13 | 91.0  | 5.25  | 0.0128 |
| -0.9725 | I1MBL5     | Uncharacterized protein                         | 40 | 15 | 57.9  | 8.75  | 0.0187 |
| -0.9758 | I1K8M2     | Transmembrane 9 superfamily member              | 20 | 9  | 73.2  | 7.61  | 0.0300 |
| -0.9772 | I1MQP2     | Cellulase domain-containing protein             | 7  | 3  | 56.2  | 5.62  | 0.0005 |
| -0.9863 | I1LZN1     | Transmembrane 9 superfamily member              | 17 | 8  | 77.5  | 6.96  | 0.0290 |
| -0.9909 | I1LPL0     | FAD-binding PCMH-type domain-containing protein | 47 | 19 | 66.0  | 8.22  | 0.0045 |
| -0.9936 | A0A0R4J645 | Uncharacterized protein                         | 9  | 2  | 41.6  | 5.45  | 0.0126 |
| -0.9960 | A0A0R0K0E5 | FAD-binding PCMH-type domain-containing protein | 10 | 4  | 59.2  | 7.85  | 0.0015 |
| -0.9977 | I1MPK1     | Uncharacterized protein                         | 6  | 2  | 49.9  | 5.58  | 0.0012 |
| -0.9993 | C6SXF0     | Uncharacterized protein                         | 23 | 3  | 22.6  | 10.23 | 0.0039 |
| -1.0009 | I1KG34     | Uncharacterized protein                         | 74 | 32 | 68.7  | 5.50  | 0.0200 |
| -1.0047 | C6THA9     | NAD(P)-bd_dom domain-containing protein         | 51 | 11 | 39.1  | 8.13  | 0.0272 |
| -1.0052 | A0A0R0G3L8 | Phospho-2-dehydro-3-deoxyheptonate aldolase     | 22 | 9  | 54.9  | 8.28  | 0.0100 |
| -1.0065 | Q39828     | Dynamin-related protein 5A                      | 26 | 13 | 68.3  | 7.99  | 0.0198 |
| -1.0099 | I1KP02     | Uncharacterized protein                         | 27 | 11 | 65.3  | 5.05  | 0.0007 |
| -1.0105 | K7M5U1     | GH10 domain-containing protein                  | 13 | 9  | 103.8 | 6.95  | 0.0031 |
| -1.0125 | K7MLF2     | AAA domain-containing protein                   | 12 | 8  | 132.6 | 6.61  | 0.0003 |
| -1.0137 | C6SY48     | Glutathione peroxidase                          | 26 | 3  | 18.9  | 9.07  | 0.0070 |
| -1.0160 | I1K3H5     | Lactamase_B domain-containing protein           | 11 | 2  | 34.8  | 6.57  | 0.0219 |
| -1.0181 | I1KJZ0     | E3 ubiquitin-protein ligase (EC 2.3.2.27)       | 2  | 2  | 229.8 | 6.25  | 0.0252 |
| -1.0200 | I1LWZ5     | PMR5N domain-containing protein                 | 7  | 2  | 50.4  | 6.84  | 0.0341 |

|         |            |                                                |    |    |       |      |        |
|---------|------------|------------------------------------------------|----|----|-------|------|--------|
| -1.0210 | K7KRR7     | X8 domain-containing protein                   | 10 | 3  | 54.4  | 5.97 | 0.0306 |
| -1.0235 | I1KEH1     | Phytoeyanin domain-containing protein          | 20 | 3  | 23.2  | 7.87 | 0.0001 |
| -1.0237 | I1M9W9     | Uncharacterized protein                        | 4  | 2  | 107.0 | 7.27 | 0.0157 |
| -1.0258 | I1N6I1     | Hexosyltransferase (EC 2.4.1.-)                | 8  | 3  | 63.1  | 8.48 | 0.0024 |
| -1.0314 | C6T1T3     | Uncharacterized protein                        | 35 | 4  | 22.4  | 6.07 | 0.0061 |
| -1.0320 | I1KYC6     | Peptidase A1 domain-containing protein         | 14 | 4  | 51.9  | 7.84 | 0.0101 |
| -1.0327 | I1J4W3     | Uncharacterized protein                        | 10 | 4  | 73.1  | 7.23 | 0.0468 |
| -1.0344 | I1M1I9     | Uncharacterized protein                        | 5  | 3  | 82.0  | 9.28 | 0.0017 |
| -1.0392 | I1LVI0     | Protein kinase domain-containing protein       | 10 | 5  | 100.6 | 7.25 | 0.0395 |
| -1.0420 | I1ND63     | LRRNT_2 domain-containing protein              | 21 | 7  | 50.3  | 8.05 | 0.0131 |
| -1.0428 | I1M9S1     | Plasma membrane ATPase (EC 7.1.2.1)            | 32 | 22 | 104.6 | 7.21 | 0.0013 |
| -1.0483 | I1MA39     | Lipase_GDSL domain-containing protein          | 13 | 3  | 46.8  | 8.19 | 0.0301 |
| -1.0483 | A0A0R0I2M6 | Peroxidase (EC 1.11.1.7)                       | 34 | 5  | 38.5  | 6.04 | 0.0114 |
| -1.0506 | C6TI50     | Peroxidase (EC 1.11.1.7)                       | 31 | 5  | 38.0  | 8.43 | 0.0220 |
| -1.0557 | I1LLG3     | Peptidase A1 domain-containing protein         | 29 | 6  | 46.8  | 9.01 | 0.0010 |
| -1.0565 | I1MHW2     | Uncharacterized protein                        | 4  | 3  | 94.2  | 6.64 | 0.0046 |
| -1.0567 | A0A0R4J2V8 | Dirigent protein                               | 28 | 3  | 23.9  | 6.28 | 0.0027 |
| -1.0571 | A0A0R0L0K1 | Uncharacterized protein                        | 10 | 4  | 62.4  | 9.07 | 0.0098 |
| -1.0572 | I1M9K9     | Uncharacterized protein                        | 25 | 8  | 39.8  | 7.74 | 0.0076 |
| -1.0579 | A0A0R0HFK7 | Exostosin domain-containing protein            | 5  | 2  | 59.4  | 8.84 | 0.0081 |
| -1.0621 | I1MEL2     | Uncharacterized protein                        | 31 | 2  | 13.3  | 8.81 | 0.0086 |
| -1.0643 | I1LJG0     | Glycosyltransferase (EC 2.4.2.-)               | 22 | 6  | 49.4  | 8.78 | 0.0028 |
| -1.0643 | C6SX09     | Uncharacterized protein                        | 34 | 7  | 29.2  | 6.35 | 0.0066 |
| -1.0693 | A0A0R0JQ91 | Chlorophyll a-b binding protein, chloroplastic | 33 | 4  | 27.9  | 7.44 | 0.0366 |
| -1.0728 | I1NIY9     | Mitochondrial Rho GTPase (EC 3.6.5.-)          | 43 | 16 | 71.9  | 5.54 | 0.0037 |
| -1.0749 | I1LQ25     | Glucose-1-phosphate adenylyltransferase        | 13 | 4  | 58.5  | 8.29 | 0.0130 |
| -1.0807 | C6TJF9     | Uncharacterized protein                        | 55 | 8  | 24.0  | 6.58 | 0.0014 |
| -1.0811 | I1MXA0     | Uncharacterized protein                        | 4  | 2  | 63.2  | 5.36 | 0.0029 |
| -1.0826 | C6SVL0     | Uncharacterized protein                        | 47 | 6  | 21.8  | 5.33 | 0.0043 |
| -1.0969 | K7MPZ4     | dUTPase domain-containing protein              | 43 | 3  | 15.7  | 5.53 | 0.0045 |
| -1.1072 | C6T9R8     | Glyceraldehyde-3-phosphate dehydrogenase       | 37 | 10 | 48.1  | 7.43 | 0.0235 |
| -1.1073 | I1LMX6     | Uroporphyrinogen decarboxylase (EC 4.1.1.37)   | 25 | 5  | 42.7  | 7.49 | 0.0012 |
| -1.1092 | I1MY52     | PKS_ER domain-containing protein               | 22 | 4  | 39.4  | 7.33 | 0.0195 |
| -1.1108 | I1K7G0     | Methyltransferase (EC 2.1.1.-)                 | 34 | 10 | 40.4  | 6.74 | 0.0001 |
| -1.1108 | I1MY38     | HATPase_c domain-containing protein            | 38 | 28 | 93.2  | 4.98 | 0.0468 |
| -1.1121 | I1NBM7     | Uncharacterized protein                        | 32 | 10 | 55.5  | 6.73 | 0.0055 |
| -1.1152 | A0A0R0FQV9 | Xyloglucan endotransglucosylase/hydrolase      | 28 | 7  | 33.7  | 6.93 | 0.0202 |
| -1.1202 | I1LLM7     | Asparagine synthetase                          | 51 | 19 | 65.2  | 6.64 | 0.0079 |
| -1.1250 | K7LQ40     | Pyr_redox_2 domain-containing protein          | 9  | 2  | 39.4  | 8.54 | 0.0000 |
| -1.1318 | D2D5G3     | Methyltransferase (EC 2.1.1.-)                 | 31 | 9  | 40.4  | 6.95 | 0.0065 |
| -1.1418 | A0A0R0GAQ0 | Peptidase A1 domain-containing protein         | 5  | 2  | 50.1  | 8.75 | 0.0080 |
| -1.1497 | I1NCT8     | Potassium transporter                          | 4  | 2  | 88.4  | 8.56 | 0.0018 |
| -1.1536 | I1K0I0     | Uncharacterized protein                        | 10 | 5  | 75.6  | 8.37 | 0.0183 |
| -1.1598 | I1L1D9     | Uncharacterized protein                        | 35 | 2  | 10.5  | 9.35 | 0.0310 |
| -1.1673 | C6TA28     | Nucleoside diphosphate kinase (EC 2.7.4.6)     | 15 | 2  | 25.2  | 9.03 | 0.0074 |
| -1.1673 | C6SVC7     | Uncharacterized protein                        | 32 | 3  | 20.2  | 7.87 | 0.0003 |
| -1.1714 | C6F122     | Beta-galactosidase (EC 3.2.1.23)               | 14 | 5  | 79.8  | 8.03 | 0.0421 |
| -1.1738 | I1LBD2     | Uncharacterized protein                        | 14 | 2  | 22.0  | 5.21 | 0.0187 |
| -1.1770 | A0A0R0GA40 | Uncharacterized protein                        | 13 | 3  | 50.8  | 6.01 | 0.0170 |
| -1.1783 | A0A0R0H2Z4 | Uncharacterized protein                        | 22 | 7  | 59.8  | 8.94 | 0.0247 |
| -1.1817 | I1J7R6     | FACT complex subunit SSRP1                     | 6  | 3  | 71.8  | 5.78 | 0.0329 |
| -1.1833 | K7N361     | Lipase                                         | 11 | 3  | 49.2  | 7.23 | 0.0063 |
| -1.1900 | I1K108     | Uncharacterized protein                        | 52 | 18 | 69.1  | 7.93 | 0.0001 |
| -1.1922 | I1KET7     | PMR5N domain-containing protein                | 8  | 2  | 40.6  | 8.94 | 0.0045 |
| -1.1958 | C6SYP7     | Dirigent protein                               | 18 | 2  | 24.2  | 8.37 | 0.0015 |
| -1.2125 | I1MBC5     | Asparagine synthetase                          | 57 | 21 | 65.5  | 6.47 | 0.0005 |
| -1.2182 | I1NAB2     | Uncharacterized protein                        | 9  | 8  | 146.2 | 7.62 | 0.0046 |

|         |            |                                                 |    |    |       |       |        |
|---------|------------|-------------------------------------------------|----|----|-------|-------|--------|
| -1.2192 | I1L6Z0     | Cellulase domain-containing protein             | 7  | 3  | 55.5  | 5.64  | 0.0238 |
| -1.2422 | I1K6B1     | NAB domain-containing protein                   | 5  | 4  | 139.4 | 4.94  | 0.0078 |
| -1.2507 | I1J5A5     | Aldedh domain-containing protein                | 50 | 16 | 58.4  | 6.84  | 0.0043 |
| -1.2593 | C6SZQ8     | Phytoecyanin domain-containing protein          | 24 | 2  | 17.3  | 6.76  | 0.0246 |
| -1.2730 | I1LRP4     | Uncharacterized protein                         | 27 | 8  | 60.2  | 7.28  | 0.0280 |
| -1.2771 | I1MLA1     | Uncharacterized protein                         | 6  | 2  | 55.0  | 8.94  | 0.0026 |
| -1.2786 | I1MTI7     | Aldedh domain-containing protein                | 27 | 8  | 49.7  | 8.13  | 0.0022 |
| -1.2803 | I1KHL4     | Chlorophyll a-b binding protein, chloroplastic  | 22 | 3  | 30.8  | 6.39  | 0.0228 |
| -1.2808 | I1L2Z2     | SPX domain-containing protein                   | 9  | 4  | 78.1  | 6.61  | 0.0026 |
| -1.2818 | I1MCZ5     | LEA_2 domain-containing protein                 | 12 | 2  | 27.9  | 10.27 | 0.0001 |
| -1.2873 | I1MHW9     | Uncharacterized protein                         | 12 | 4  | 59.1  | 6.11  | 0.0174 |
| -1.2874 | I1J5R4     | Uncharacterized protein                         | 15 | 2  | 25.9  | 5.07  | 0.0292 |
| -1.2946 | I1KQC0     | Uncharacterized protein                         | 15 | 6  | 68.8  | 8.95  | 0.0455 |
| -1.3102 | I1KRB5     | FAD-binding PCMH-type domain-containing protein | 33 | 12 | 58.8  | 8.70  | 0.0039 |
| -1.3289 | I1K510     | Uncharacterized protein                         | 18 | 8  | 93.7  | 5.17  | 0.0036 |
| -1.3330 | I1KMK2     | Uncharacterized protein                         | 4  | 3  | 162.5 | 8.13  | 0.0062 |
| -1.3344 | A8HTK0     | Thioredoxin                                     | 51 | 4  | 13.3  | 5.53  | 0.0084 |
| -1.3413 | K7LQS4     | Uncharacterized protein                         | 5  | 2  | 72.1  | 6.54  | 0.0105 |
| -1.3421 | I1JWM6     | COBRA-like protein                              | 10 | 2  | 50.6  | 8.68  | 0.0377 |
| -1.3427 | I1MS92     | Uncharacterized protein                         | 5  | 2  | 55.0  | 8.28  | 0.0063 |
| -1.3447 | A8C8H5     | Glutamate decarboxylase (EC 4.1.1.15)           | 59 | 19 | 57.2  | 5.82  | 0.0014 |
| -1.3474 | I1LZU4     | CYTH domain-containing protein                  | 13 | 2  | 22.3  | 5.39  | 0.0002 |
| -1.3518 | I1KBS7     | Uncharacterized protein                         | 39 | 12 | 62.5  | 4.86  | 0.0008 |
| -1.3558 | I1MQL3     | Uncharacterized protein                         | 18 | 14 | 116.4 | 9.31  | 0.0134 |
| -1.3585 | A0A0R0GN50 | Phosphotransferase (EC 2.7.1.-)                 | 29 | 9  | 53.7  | 5.24  | 0.0044 |
| -1.3586 | I1MZM7     | Uncharacterized protein                         | 27 | 4  | 26.7  | 6.42  | 0.0076 |
| -1.3632 | C6THI3     | PKS_ER domain-containing protein                | 58 | 12 | 39.1  | 6.84  | 0.0102 |
| -1.3635 | I1MER4     | PMR5N domain-containing protein                 | 28 | 6  | 42.3  | 8.75  | 0.0015 |
| -1.3677 | K7KN46     | Uncharacterized protein                         | 2  | 2  | 239.3 | 5.77  | 0.0471 |
| -1.3708 | K7LP97     | RRM domain-containing protein                   | 42 | 5  | 16.9  | 8.12  | 0.0015 |
| -1.3770 | K7LCZ8     | Cellulose synthase (EC 2.4.1.12)                | 20 | 11 | 120.1 | 7.39  | 0.0017 |
| -1.3800 | C6T447     | Uncharacterized protein                         | 40 | 6  | 25.1  | 6.35  | 0.0172 |
| -1.3876 | I1N4W1     | PMR5N domain-containing protein                 | 24 | 6  | 51.3  | 8.51  | 0.0006 |
| -1.3922 | I1KSC1     | Uncharacterized protein                         | 11 | 5  | 66.5  | 8.19  | 0.0001 |
| -1.3923 | A0A0R0EHS8 | PMR5N domain-containing protein                 | 33 | 3  | 20.5  | 8.31  | 0.0020 |
| -1.3928 | C6TI75     | NTP_transferase domain-containing protein       | 22 | 5  | 39.6  | 7.49  | 0.0369 |
| -1.4015 | I1KNV8     | Uncharacterized protein                         | 14 | 7  | 95.1  | 5.14  | 0.0141 |
| -1.4032 | I1K702     | PLCXc domain-containing protein                 | 26 | 5  | 36.2  | 8.02  | 0.0072 |
| -1.4111 | I1KRH0     | AAA domain-containing protein                   | 9  | 2  | 45.4  | 6.29  | 0.0120 |
| -1.4310 | A0A0R0HUK1 | Uncharacterized protein                         | 18 | 3  | 30.7  | 7.42  | 0.0187 |
| -1.4347 | I1NII6     | IPPC domain-containing protein                  | 2  | 2  | 127.2 | 6.47  | 0.0300 |
| -1.4531 | K7MP10     | Uncharacterized protein                         | 10 | 6  | 118.6 | 5.02  | 0.0112 |
| -1.4605 | A0A0R0FVX1 | Uncharacterized protein                         | 32 | 12 | 58.6  | 7.37  | 0.0001 |
| -1.4696 | I1L0D9     | Peroxidase (EC 1.11.1.7)                        | 36 | 6  | 38.0  | 7.30  | 0.0062 |
| -1.4723 | K7KZ57     | Uncharacterized protein                         | 5  | 2  | 51.6  | 6.42  | 0.0029 |
| -1.4724 | C6T736     | V-SNARE domain-containing protein               | 42 | 6  | 24.7  | 9.50  | 0.0001 |
| -1.4725 | A0A0R0J452 | Uncharacterized protein                         | 19 | 3  | 25.2  | 6.15  | 0.0058 |
| -1.4859 | C6TMX0     | Xyloglucan endotransglucosylase/hydrolase       | 31 | 8  | 34.4  | 8.95  | 0.0192 |
| -1.5011 | I1KZ04     | Cytochrome b561 and DOMON protein               | 13 | 3  | 43.2  | 9.38  | 0.0018 |
| -1.5060 | I1MLV5     | Fe2OG dioxygenase domain-containing protein     | 32 | 7  | 35.8  | 5.69  | 0.0481 |
| -1.5145 | K7LJA2     | Uncharacterized protein                         | 8  | 2  | 51.2  | 6.02  | 0.0005 |
| -1.5155 | I1LHR1     | RRM domain-containing protein                   | 8  | 2  | 57.6  | 8.41  | 0.0343 |
| -1.5285 | C6T3E5     | MPN domain-containing protein                   | 39 | 4  | 22.9  | 5.78  | 0.0203 |
| -1.5380 | I1M3B6     | Uncharacterized protein                         | 3  | 2  | 131.6 | 7.34  | 0.0003 |
| -1.5532 | I1M3S8     | Uncharacterized protein                         | 4  | 3  | 85.7  | 5.12  | 0.0062 |
| -1.5570 | I1KD34     | COBRA-like protein                              | 14 | 3  | 50.7  | 8.60  | 0.0002 |
| -1.5571 | I1L3E3     | Uncharacterized protein                         | 6  | 2  | 39.4  | 9.48  | 0.0010 |

|         |            |                                                |    |    |       |      |        |
|---------|------------|------------------------------------------------|----|----|-------|------|--------|
| -1.5647 | Q8LGT8     | Phosphoglycerate mutase-like protein           | 20 | 4  | 31.8  | 6.34 | 0.0488 |
| -1.5938 | A0A0R0IYY7 | Uncharacterized protein                        | 51 | 19 | 59.0  | 8.65 | 0.0001 |
| -1.6086 | K7K7V7     | Pterin-binding domain-containing protein       | 15 | 5  | 57.4  | 7.42 | 0.0100 |
| -1.6092 | C6TD35     | PABS domain-containing protein                 | 9  | 2  | 37.0  | 5.40 | 0.0033 |
| -1.6144 | A0A0R0G7V6 | Uncharacterized protein                        | 5  | 2  | 62.8  | 6.99 | 0.0177 |
| -1.6241 | A0A0R4J508 | Expansin                                       | 11 | 2  | 27.9  | 9.26 | 0.0015 |
| -1.6335 | I1JIW7     | Uncharacterized protein                        | 30 | 7  | 24.9  | 9.42 | 0.0024 |
| -1.6454 | I1LVS4     | Uncharacterized protein                        | 27 | 9  | 61.7  | 5.20 | 0.0127 |
| -1.6549 | C6TDZ7     | Uncharacterized protein                        | 14 | 3  | 40.2  | 6.19 | 0.0006 |
| -1.6588 | I1JT65     | Uncharacterized protein                        | 18 | 4  | 40.1  | 6.37 | 0.0001 |
| -1.6799 | C6THF2     | Uncharacterized protein                        | 14 | 2  | 31.5  | 5.36 | 0.0001 |
| -1.6808 | A0A0R0IA82 | Peptidase A1 domain-containing protein         | 14 | 3  | 52.8  | 5.35 | 0.0012 |
| -1.6826 | A0A0R0KTP5 | Uncharacterized protein                        | 30 | 4  | 30.4  | 8.15 | 0.0494 |
| -1.6847 | A0A024FRX1 | Glycosyltransferase (EC 2.4.1.-)               | 10 | 3  | 52.2  | 6.14 | 0.0003 |
| -1.6949 | I1MMC2     | t-SNARE coiled-coil homology protein           | 18 | 3  | 30.0  | 6.32 | 0.0027 |
| -1.7112 | I1KTE1     | Cellulose synthase (EC 2.4.1.12)               | 12 | 8  | 123.9 | 6.93 | 0.0009 |
| -1.7140 | I1MNI2     | Uncharacterized protein                        | 16 | 3  | 39.6  | 6.80 | 0.0080 |
| -1.7162 | A0A0R0KYU7 | Xyloglucan endotransglucosylase/hydrolase      | 29 | 8  | 36.0  | 8.25 | 0.0000 |
| -1.7217 | A0A0R0INP8 | Peroxidase (EC 1.11.1.7)                       | 29 | 7  | 34.5  | 8.90 | 0.0017 |
| -1.7267 | I1LCV9     | Carboxypeptidase (EC 3.4.16.-)                 | 16 | 6  | 56.0  | 5.38 | 0.0025 |
| -1.7448 | C6SVM4     | Uncharacterized protein                        | 35 | 4  | 22.3  | 5.82 | 0.0041 |
| -1.7567 | I1LA99     | Uncharacterized protein                        | 10 | 4  | 86.2  | 5.92 | 0.0440 |
| -1.7632 | I1L7W1     | Uncharacterized protein                        | 4  | 4  | 167.6 | 8.15 | 0.0014 |
| -1.7641 | C6ZRR4     | NAK-type protein kinase                        | 8  | 5  | 102.2 | 6.34 | 0.0008 |
| -1.7689 | I1LL85     | Uncharacterized protein                        | 5  | 2  | 60.7  | 8.48 | 0.0003 |
| -1.7749 | I1K8B5     | Uncharacterized protein                        | 11 | 2  | 53.5  | 6.13 | 0.0074 |
| -1.7803 | Q8S564     | 4-coumarate:coenzyme A ligase (EC 6.2.1.12)    | 26 | 9  | 59.3  | 5.91 | 0.0004 |
| -1.7845 | I1JUE0     | Cellulose synthase (EC 2.4.1.12)               | 28 | 19 | 122.0 | 6.76 | 0.0001 |
| -1.7961 | I1NAW5     | Uncharacterized protein                        | 15 | 3  | 50.5  | 6.71 | 0.0150 |
| -1.7981 | I1L0Z7     | Uncharacterized protein                        | 6  | 6  | 168.3 | 7.47 | 0.0002 |
| -1.8001 | C6SXG7     | FMN_red domain-containing protein              | 63 | 7  | 21.5  | 8.82 | 0.0126 |
| -1.8130 | I1MWI1     | zinc_ribbon_10 domain-containing protein       | 9  | 2  | 44.8  | 8.84 | 0.0012 |
| -1.8142 | I1MXX3     | Uncharacterized protein                        | 21 | 2  | 16.5  | 9.31 | 0.0023 |
| -1.8150 | C6TLB6     | Uncharacterized protein                        | 46 | 11 | 46.3  | 6.30 | 0.0010 |
| -1.8279 | C6TL20     | Lipase_GDSL domain-containing protein          | 31 | 7  | 40.2  | 6.10 | 0.0017 |
| -1.8295 | I1LI35     | Vacuolar protein sorting-associated protein 35 | 18 | 8  | 89.7  | 5.44 | 0.0008 |
| -1.8427 | C6SYN8     | Uncharacterized protein                        | 24 | 2  | 15.5  | 7.96 | 0.0423 |
| -1.8565 | I1K3A6     | Uncharacterized protein                        | 10 | 4  | 64.3  | 6.57 | 0.0001 |
| -1.8580 | I1NEV9     | Uncharacterized protein                        | 15 | 2  | 24.2  | 7.83 | 0.0160 |
| -1.8758 | I1L6R1     | Uncharacterized protein                        | 13 | 6  | 66.9  | 8.27 | 0.0249 |
| -1.8945 | A0A0R0KRN8 | Glycosyltransferase (EC 2.4.1.-)               | 7  | 2  | 50.9  | 7.50 | 0.0010 |
| -1.9108 | I1JCY0     | Chlorophyll a-b binding protein, chloroplastic | 18 | 3  | 26.7  | 6.68 | 0.0153 |
| -1.9271 | C6SZJ5     | FAS1 domain-containing protein                 | 14 | 2  | 26.3  | 9.57 | 0.0026 |
| -1.9278 | A0A0R0HZ32 | Uncharacterized protein                        | 13 | 2  | 20.0  | 5.30 | 0.0000 |
| -1.9318 | I1MNV4     | Uncharacterized protein                        | 3  | 2  | 125.9 | 5.22 | 0.0067 |
| -1.9357 | I1JVD1     | Uncharacterized protein                        | 6  | 3  | 78.7  | 6.73 | 0.0165 |
| -1.9358 | I1ND18     | Uncharacterized protein                        | 9  | 3  | 73.8  | 6.83 | 0.0056 |
| -1.9361 | A0A0R4J551 | Phytoeyanin domain-containing protein          | 19 | 2  | 20.9  | 7.36 | 0.0361 |
| -1.9599 | K7KP88     | Uncharacterized protein                        | 3  | 5  | 255.0 | 6.07 | 0.0129 |
| -1.9635 | Q2LAL4     | Cytochrome P450 monooxygenase CYP83E8          | 38 | 13 | 57.4  | 7.96 | 0.0017 |
| -1.9707 | I1KH95     | Uncharacterized protein                        | 5  | 2  | 93.0  | 8.76 | 0.0011 |
| -1.9772 | I1K8W4     | Cellulose synthase (EC 2.4.1.12)               | 28 | 18 | 122.0 | 6.76 | 0.0004 |
| -1.9853 | I1LDY8     | Uncharacterized protein                        | 23 | 5  | 52.1  | 7.80 | 0.0011 |
| -2.0002 | I1M192     | Uncharacterized protein                        | 26 | 5  | 33.3  | 5.81 | 0.0048 |
| -2.0075 | C6TEQ7     | Lipase_GDSL domain-containing protein          | 15 | 2  | 37.8  | 7.85 | 0.0078 |
| -2.0174 | A0A0R0FGJ1 | Protein kinase domain-containing protein       | 4  | 2  | 95.1  | 6.23 | 0.0092 |

|         |            |                                                 |    |    |       |      |        |
|---------|------------|-------------------------------------------------|----|----|-------|------|--------|
| -2.0339 | K7MNL1     | AB hydrolase-1 domain-containing protein        | 10 | 2  | 29.9  | 6.21 | 0.0258 |
| -2.0362 | Q2LAL0     | Cytochrome P450 monooxygenase CYP81E11          | 22 | 6  | 57.9  | 8.91 | 0.0107 |
| -2.0459 | C6T8K0     | LEA_2 domain-containing protein                 | 19 | 4  | 34.2  | 9.94 | 0.0001 |
| -2.0550 | I1LH27     | Tubulin alpha chain                             | 56 | 20 | 49.7  | 5.06 | 0.0019 |
| -2.0794 | I1KWS8     | Glyco_hydro_19_cat domain-containing protein    | 10 | 2  | 36.0  | 6.27 | 0.0004 |
| -2.0933 | K7M4N7     | Uncharacterized protein                         | 4  | 2  | 65.1  | 8.12 | 0.0002 |
| -2.1012 | A0A0R0HPC7 | Pectate lyase (EC 4.2.2.2)                      | 5  | 2  | 42.1  | 8.09 | 0.0004 |
| -2.1108 | I1JRU5     | Lipase_GDSL domain-containing protein           | 25 | 6  | 40.4  | 5.74 | 0.0008 |
| -2.1334 | C6TJK9     | Peptidyl-prolyl cis-trans isomerase             | 10 | 2  | 28.3  | 8.60 | 0.0005 |
| -2.1461 | I1K3E9     | CULLIN_2 domain-containing protein              | 10 | 6  | 88.5  | 7.65 | 0.0166 |
| -2.2140 | I1N843     | Glyceraldehyde-3-phosphate dehydrogenase        | 47 | 14 | 43.2  | 8.25 | 0.0000 |
| -2.2167 | I1LB67     | t-SNARE coiled-coil homology protein            | 10 | 2  | 36.3  | 8.81 | 0.0194 |
| -2.2268 | I1NHU7     | Uncharacterized protein                         | 10 | 2  | 39.0  | 6.29 | 0.0278 |
| -2.2439 | A0A0R0EP22 | Uncharacterized protein                         | 14 | 6  | 76.5  | 7.87 | 0.0237 |
| -2.2451 | A0A0R0LOI9 | HTH myb-type domain-containing protein          | 2  | 2  | 46.7  | 6.84 | 0.0076 |
| -2.2454 | I1MI08     | Transmembrane 9 superfamily member              | 21 | 10 | 74.9  | 5.88 | 0.0014 |
| -2.2574 | I1KNP5     | Endoglucanase (EC 3.2.1.4)                      | 9  | 4  | 68.7  | 8.72 | 0.0427 |
| -2.2622 | K7L6B3     | Uncharacterized protein                         | 13 | 2  | 31.1  | 6.93 | 0.0008 |
| -2.3237 | K7LYU8     | Uncharacterized protein                         | 7  | 2  | 66.9  | 7.18 | 0.0196 |
| -2.3297 | I1MVM2     | Uncharacterized protein                         | 5  | 2  | 69.8  | 6.38 | 0.0381 |
| -2.3618 | C6SZD1     | UBIQUITIN_CONJUGAT_2 protein                    | 11 | 2  | 18.1  | 5.39 | 0.0053 |
| -2.3838 | I1MZV7     | Uncharacterized protein                         | 5  | 2  | 49.6  | 8.68 | 0.0095 |
| -2.4066 | I1MY41     | Uncharacterized protein                         | 13 | 5  | 61.3  | 6.65 | 0.0047 |
| -2.4512 | I1L2J3     | Uncharacterized protein                         | 16 | 5  | 66.7  | 7.18 | 0.0217 |
| -2.4562 | K7MNZ5     | Uncharacterized protein                         | 15 | 3  | 40.4  | 6.70 | 0.0006 |
| -2.4712 | A0A0R0IPL8 | NAD(P)-bd_dom domain-containing protein         | 35 | 7  | 38.5  | 6.54 | 0.0421 |
| -2.4892 | I1MFX5     | Endoglucanase (EC 3.2.1.4)                      | 13 | 6  | 68.3  | 8.66 | 0.0003 |
| -2.4906 | A0A0R0LJE6 | Uncharacterized protein                         | 4  | 2  | 83.1  | 7.11 | 0.0220 |
| -2.4911 | A0A0R0I5R9 | Uncharacterized protein                         | 38 | 12 | 48.0  | 6.52 | 0.0005 |
| -2.5087 | Q9XFI6     | Peroxidase (EC 1.11.1.7)                        | 23 | 5  | 37.4  | 8.35 | 0.0021 |
| -2.5298 | I1K2X6     | FAD-binding PCMH-type domain-containing protein | 30 | 11 | 59.5  | 9.03 | 0.0339 |
| -2.5372 | K7M1F7     | Lipase_GDSL domain-containing protein           | 8  | 2  | 40.5  | 7.91 | 0.0005 |
| -2.6118 | Q2MJR4     | Myo-inositol-1-phosphate synthase               | 40 | 9  | 56.4  | 5.67 | 0.0061 |
| -2.6285 | I1K6Q2     | Uncharacterized protein                         | 12 | 3  | 48.3  | 5.78 | 0.0166 |
| -2.6332 | A0A368UNA6 | SSD domain-containing protein                   | 14 | 10 | 138.7 | 5.22 | 0.0095 |
| -2.6470 | I1L1D2     | Uncharacterized protein                         | 6  | 3  | 88.5  | 7.15 | 0.0414 |
| -2.6623 | Q70MR6     | Ornithine decarboxylase (EC 4.1.1.17)           | 9  | 2  | 46.4  | 5.49 | 0.0103 |
| -2.6754 | I1L158     | Cellulose synthase (EC 2.4.1.12)                | 6  | 3  | 119.2 | 7.62 | 0.0154 |
| -2.6970 | I1JFT2     | Glycosyltransferase (EC 2.4.1.-)                | 6  | 2  | 54.9  | 6.52 | 0.0009 |
| -2.7072 | A0A0R0HMK4 | Uncharacterized protein                         | 8  | 2  | 46.1  | 7.50 | 0.0003 |
| -2.7144 | I1K0W4     | Glutamate dehydrogenase                         | 17 | 4  | 44.8  | 6.61 | 0.0259 |
| -2.7338 | C6KHU4     | Phenylalanine ammonia-lyase (EC 4.3.1.24)       | 41 | 16 | 78.1  | 6.19 | 0.0001 |
| -2.7677 | K7MQS3     | Peptidase A1 domain-containing protein          | 16 | 3  | 52.0  | 8.12 | 0.0003 |
| -2.7941 | I1NGM0     | Uncharacterized protein                         | 5  | 2  | 75.1  | 9.01 | 0.0009 |
| -2.8082 | I1M8S3     | Uncharacterized protein                         | 36 | 15 | 82.1  | 7.39 | 0.0009 |
| -2.8427 | I1KG57     | Uncharacterized protein                         | 32 | 9  | 46.6  | 5.88 | 0.0109 |
| -2.8776 | I1J785     | Uncharacterized protein                         | 25 | 8  | 52.0  | 7.78 | 0.0194 |
| -2.9483 | I1N641     | Uncharacterized protein                         | 16 | 14 | 136.1 | 7.99 | 0.0001 |
| -2.9488 | A0A0R4J3Q3 | ABC transporter domain-containing protein       | 33 | 4  | 28.3  | 5.90 | 0.0232 |
| -3.0120 | I1KLU0     | Mitogen-activated protein kinase (EC 2.7.11.24) | 27 | 7  | 49.9  | 5.96 | 0.0000 |
| -3.0368 | I1L5J4     | Uncharacterized protein                         | 7  | 2  | 45.5  | 8.72 | 0.0218 |
| -3.0375 | C6TK45     | Uncharacterized protein                         | 8  | 2  | 43.8  | 8.46 | 0.0005 |
| -3.0905 | I1MAU6     | Uncharacterized protein                         | 8  | 4  | 78.8  | 6.55 | 0.0198 |
| -3.1094 | C6TH72     | Fe2OG dioxygenase domain-containing protein     | 25 | 4  | 32.9  | 5.43 | 0.0431 |
| -3.1585 | C6TD22     | Glyco_hydro_19_cat domain-containing protein    | 15 | 3  | 36.4  | 6.51 | 0.0001 |
| -3.2153 | I1M1T9     | ALOG domain-containing protein                  | 20 | 3  | 20.2  | 9.72 | 0.0047 |
| -3.2262 | C6T3V3     | Glutathione peroxidase                          | 18 | 3  | 19.1  | 9.61 | 0.0001 |

|          |            |                                                   |    |    |       |      |        |
|----------|------------|---------------------------------------------------|----|----|-------|------|--------|
| -3.2293  | I1MC22     | Lipase_GDSL domain-containing protein             | 10 | 2  | 39.9  | 7.85 | 0.0413 |
| -3.2428  | I1L090     | Endoglucanase (EC 3.2.1.4)                        | 13 | 6  | 68.3  | 8.68 | 0.0001 |
| -3.2597  | A0A024FRL5 | Glycosyltransferase (EC 2.4.1.-)                  | 8  | 2  | 52.0  | 5.92 | 0.0050 |
| -3.3298  | A0A0R0JYG7 | Protein kinase domain-containing protein          | 11 | 4  | 76.1  | 6.54 | 0.0065 |
| -3.3321  | I1ML02     | Uncharacterized protein                           | 8  | 4  | 69.9  | 6.62 | 0.0006 |
| -3.3431  | I1N0K6     | WD_REPEATS_REGION domain-containing protein       | 43 | 6  | 32.6  | 6.16 | 0.0323 |
| -3.3501  | I1JQB4     | Uncharacterized protein                           | 15 | 3  | 50.1  | 6.46 | 0.0092 |
| -3.3546  | I1KYC4     | Peptidase A1 domain-containing protein            | 15 | 4  | 51.9  | 8.07 | 0.0013 |
| -3.3578  | I1N6V6     | PPR_long domain-containing protein                | 11 | 3  | 50.7  | 7.42 | 0.0060 |
| -3.3939  | I1N019     | Uncharacterized protein                           | 12 | 4  | 72.2  | 6.25 | 0.0020 |
| -3.3941  | I1JSP4     | X8 domain-containing protein                      | 10 | 2  | 48.3  | 5.16 | 0.0008 |
| -3.4054  | I1JB2      | Uncharacterized protein                           | 45 | 11 | 50.2  | 6.99 | 0.0387 |
| -3.4989  | I1LRC1     | Uncharacterized protein                           | 21 | 9  | 62.5  | 9.11 | 0.0001 |
| -3.5022  | A0A0R4J4M3 | FAS1 domain-containing protein                    | 13 | 2  | 27.8  | 8.88 | 0.0194 |
| -3.5037  | A0A0R0KUR1 | Phenylalanine ammonia-lyase (EC 4.3.1.24)         | 20 | 9  | 77.9  | 6.42 | 0.0001 |
| -3.5069  | I1MXD5     | Uncharacterized protein                           | 6  | 2  | 53.2  | 5.58 | 0.0018 |
| -3.6505  | I1JT08     | Uncharacterized protein                           | 10 | 3  | 81.4  | 6.67 | 0.0086 |
| -3.6567  | I1MVG7     | Uncharacterized protein                           | 23 | 7  | 76.9  | 4.35 | 0.0221 |
| -3.7044  | A0A0R4J2X1 | Uncharacterized protein                           | 8  | 2  | 44.0  | 8.34 | 0.0005 |
| -3.7556  | A0A0R0HVZ4 | Exocyst subunit Exo70 family protein              | 5  | 2  | 72.0  | 6.99 | 0.0033 |
| -3.7919  | I1MXJ1     | Uncharacterized protein                           | 36 | 15 | 82.2  | 7.09 | 0.0001 |
| -3.7953  | C6TKJ2     | Xyloglucan endotransglucosylase/hydrolase         | 35 | 7  | 35.6  | 8.37 | 0.0010 |
| -3.8034  | I1M5G8     | Malic enzyme                                      | 27 | 9  | 71.3  | 7.55 | 0.0270 |
| -3.8111  | K7KP00     | Uncharacterized protein                           | 18 | 3  | 25.2  | 9.41 | 0.0039 |
| -3.8424  | I1LWJ6     | Uncharacterized protein                           | 17 | 14 | 136.0 | 7.99 | 0.0000 |
| -3.8971  | A0A0R0IBM9 | CMP/dCMP-type deaminase domain-containing protein | 19 | 3  | 20.7  | 5.86 | 0.0031 |
| -4.0931  | Q70MR5     | Ornithine decarboxylase (EC 4.1.1.17)             | 9  | 2  | 46.3  | 5.60 | 0.0021 |
| -4.1630  | I1JDD7     | Cellulose synthase (EC 2.4.1.12)                  | 11 | 7  | 121.4 | 7.18 | 0.0163 |
| -4.2009  | I1MLF6     | Uncharacterized protein                           | 5  | 2  | 73.9  | 5.45 | 0.0125 |
| -4.3376  | I1NA96     | Phenylalanine ammonia-lyase (EC 4.3.1.24)         | 28 | 11 | 77.7  | 6.49 | 0.0012 |
| -4.4031  | I1KI92     | PlsC domain-containing protein                    | 9  | 3  | 55.5  | 9.23 | 0.0000 |
| -4.5513  | I1N0I7     | t-SNARE coiled-coil homology protein              | 16 | 3  | 28.1  | 8.90 | 0.0001 |
| -4.6020  | I1LVD2     | Cellulose synthase (EC 2.4.1.12)                  | 13 | 7  | 120.5 | 7.08 | 0.0003 |
| -4.7092  | I1KPJ3     | Endoglucanase (EC 3.2.1.4)                        | 6  | 3  | 68.7  | 8.72 | 0.0034 |
| -4.8318  | I1LZ94     | Phenylalanine ammonia-lyase (EC 4.3.1.24)         | 38 | 15 | 78.1  | 6.10 | 0.0036 |
| -5.0603  | I1M8D6     | X8 domain-containing protein                      | 7  | 2  | 51.2  | 5.19 | 0.0321 |
| -5.3458  | A0A0R0I8A1 | Xyloglucan endotransglucosylase/hydrolase         | 41 | 7  | 29.9  | 7.96 | 0.0009 |
| -5.8235  | A0A0R0FIC1 | Flavodoxin-like domain-containing protein         | 4  | 2  | 71.6  | 6.92 | 0.0001 |
| -5.8610  | C6TKY7     | Str_synth domain-containing protein               | 8  | 2  | 38.8  | 7.81 | 0.0001 |
| -6.0312  | I1LKW4     | Uncharacterized protein                           | 21 | 9  | 62.4  | 9.11 | 0.0008 |
| -6.1644  | A0A0R0GCM7 | CMP/dCMP-type deaminase domain-containing protein | 19 | 3  | 20.6  | 6.13 | 0.0002 |
| -6.6578  | I1K2B5     | Uncharacterized protein                           | 20 | 9  | 79.6  | 6.60 | 0.0024 |
| -7.3191  | I1LJF7     | MFS domain-containing protein                     | 8  | 3  | 56.5  | 9.38 | 0.0009 |
| -10.4654 | A0A0R0EIR6 | Glycosyltransferase                               | 36 | 9  | 54.4  | 5.92 | 0.0000 |

Abbreviation means as follows: Cov, coverage; MP, matched protein; MW, molecular weight; Cal, calculated.  
Grey background is to proteins not considered to be differentially accumulated.
